# Supplementary material for: Deciphering genome-wide transcriptomic changes in grapevines heavily infested by spotted lanternflies
Source: Frontiers journal article supplement (doi:10.3389/finsc.2022.971221), 2022-08-25
Supplement: Data_Sheet_1.ZIP [file Data_Sheet_1.ZIP]

## Sheet: Annotation
V3.Gene.ID	baseMean	log2FoldChange	lfcSE	stat	pvalue	padj	Functional.annotation	Functionnal.category	Best.arabidopsis.match
Vitvi00g00612	22.8863	-1.42638	0.514892	-2.77025	0.0056014	0.0179674	Unknown	Unknown
Vitvi00g00671	160.34	-1.43072	0.329097	-4.34741	1.38e-05	9.4e-05	Cytochrome c oxidase subunit 2	Metabolism.Primary metabolism.Generation of metabolite precursors and energy.Electron transport.Respiratory-chain phosphorylation	ATMG00160
Vitvi00g00710	44.7837	1.73849	0.535031	3.24932	0.0011568	0.0046131	R protein MLA10	Response to stimulus.Stress response.Biotic stress response.Plant-pathogen interaction.R proteins from Plant-pathogen interaction
Vitvi00g00794	101.614	-2.94617	0.724231	-4.068	4.74e-05	0.000280744	Stem-specific protein TSJT1	Unknown	AT4G27450
Vitvi00g00870	162.637	1.36165	0.297553	4.57617	4.74e-06	3.6e-05	Unknown protein	Unknown	AT5G48520
Vitvi00g00903	109.766	-1.88857	0.255455	-7.39295	1.44e-13	4.34e-12	Unknown	Unknown
Vitvi00g00909	126.831	-1.39451	0.420381	-3.31725	0.000909075	0.00374202	S-locus lectin protein kinase	Signaling.Signaling pathway.Protein kinase	AT1G11350
Vitvi00g00937	144.871	-1.43417	0.367652	-3.9009	9.58e-05	0.00052484	DNA excision repair protein ERCC-4	Metabolism.Primary metabolism.Nucleobase, nucleoside, nucleotide, nucleic acid metabolism.Nucleic acid metabolism.DNA metabolism.DNA recombination and repair.repair.Nucleotide excision repair
Vitvi00g00944	25.7928	2.38288	0.979124	2.43369	0.0149458	0.0408792	Basic helix-loop-helix (bHLH) family	Regulation overview.Regulation of gene expression.Regulation of transcription.Transcription factor.bHLH family transcription factor	AT4G37850
Vitvi00g00983	206.554	1.36115	0.369641	3.68235	0.000231096	0.00113303	Leucine-rich repeat family protein	Diverse functions.Gene family with diverse functions.NBS-LRR superfamily	AT5G10290
Vitvi00g01098	7086.92	1.04098	0.239685	4.34312	1.4e-05	9.55e-05	BAM1 (big apical meristem 1)	Development.Reproductive development.Flower development	AT5G65700
Vitvi00g01102	160.659	4.77101	0.690637	6.90813	4.91e-12	1.16e-10	fimbrin 1	Cellular process.Cellular component organization and biogenesis.Cytoskeleton organization and biogenesis.Actin organization and biogenesis	AT5G48460
Vitvi00g01146	200.008	4.26537	1.43206	2.9785	0.00289666	0.0101867	Subtilisin-like proteinase AIR3	Metabolism.Primary metabolism.Protein metabolism and modification.Proteolysis.Peptidase-mediated proteolysis.Subtilase-mediated proteolysis
Vitvi00g01151	901.529	1.897	0.257359	7.37104	1.69e-13	5.05e-12	UDP-rhamnose/rhamnosyltransferase	Metabolism.Secondary metabolism.Phenylpropanoid metabolism.Flavonoid metabolism.Flavonoid biosynthesis.Anthocyanin biosynthesis.Anthocyanin-glycoside biosynthesis	AT2G22590
Vitvi00g01196	97.6091	-1.22436	0.281702	-4.34629	1.38e-05	9.44e-05	Unknown	Unknown
Vitvi00g01223	59.0159	-2.83733	0.514983	-5.50956	3.6e-08	4.4e-07	Extensin	Cellular process.Cellular component organization and biogenesis.Cell wall organization and biogenesis.Cell wall structural protein
Vitvi00g01285	71.0977	2.13058	0.495024	4.304	1.68e-05	0.000111722	UDP-N-acetylglucosamine pyrophosphorylase	Metabolism.Primary metabolism.Carbohydrate metabolism.Monosaccharide metabolism.Amino sugar metabolism
Vitvi00g01392	20.1164	7.58735	0.963035	7.87858	3.31e-15	1.25e-13	Endo-1,4-beta-glucanase korrigan (KOR)	Cellular process.Cellular component organization and biogenesis.Cell wall organization and biogenesis.Cell wall metabolism.Cell wall catabolism.Cellulose catabolism	AT1G65610
Vitvi00g01421	92.2678	1.23998	0.508488	2.43857	0.0147455	0.0404306	Glyoxylate reductase	Metabolism.Primary metabolism.Generation of metabolite precursors and energy.Glyoxylate and dicarboxylate metabolism
Vitvi00g01425	67.344	1.38888	0.321714	4.31713	1.58e-05	0.000106053	Unknown	Unknown
Vitvi00g01805	1580.15	1.88034	0.344518	5.4579	4.82e-08	5.69e-07	CRK10 (cysteine-rich RLK10)	Signaling.Signaling pathway.Protein kinase	AT4G23180
Vitvi00g02047	42.3842	1.44275	0.487946	2.95679	0.00310864	0.0108266	Unknown	Unknown
Vitvi00g02075	52.863	1.21336	0.406959	2.98154	0.00286806	0.0101006	No hit	No hit
Vitvi00g02077	168.929	2.55461	0.465594	5.48677	4.09e-08	4.93e-07	Glucan 1,3-beta-glucosidase	Metabolism.Primary metabolism.Carbohydrate metabolism.Polysaccharide metabolism.Starch and sucrose metabolism
Vitvi00g02173	782.686	-4.73877	1.22001	-3.88422	0.000102659	0.000557722	Expansin beta 1 precursor	Signaling.Hormone Signaling.Auxin Signaling.Auxin-mediated Signaling pathway	AT4G17030
Vitvi00g02199	9.1591	6.45182	1.29042	4.9998	5.74e-07	5.45e-06	Unknown protein	Unknown	AT4G16810
Vitvi00g02226	89.8977	4.46721	1.01025	4.42189	9.78e-06	6.93e-05	Ser/Thr receptor-like kinase1	Signaling.Signaling pathway.Protein kinase	AT5G38280
Vitvi00g02269	43.756	-1.84917	0.750567	-2.4637	0.0137512	0.0381435	No hit	No hit
Vitvi00g02289	5598.73	-4.52951	0.451486	-10.0324	1.1e-23	1.08e-21	Heavy-metal-associated domain-containing protein	Unclear
Vitvi01g00012	636.461	3.01103	0.339206	8.8767	6.89e-19	4.03e-17	Unknown protein	Unknown	AT1G69160
Vitvi01g00034	599.792	-1.10318	0.371277	-2.97131	0.0029653	0.0103834	SP1L1 (SPIRAL1-like1)	Response to stimulus.Stress response.Biotic stress response	AT3G29770
Vitvi01g00037	348.318	-1.71596	0.243693	-7.0415	1.9e-12	4.86e-11	Nuclear transport factor 2 (NTF2)	Transport overview.Primary Active Transporters.P-P-bond hydrolysis-driven transporters.Nuclear mRNA Exporter	AT1G13740
Vitvi01g00043	1495.37	3.14421	0.236269	13.3077	2.09e-40	9.48e-38	Pentatricopeptide (PPR) repeat-containing protein	Diverse functions.Gene family with diverse functions.Pentatricopeptide domain family	AT1G69290
Vitvi01g00048	512.722	1.91425	0.483578	3.95853	7.54e-05	0.000423639	Ureide permease 2 (AtUPS2)	Transport overview.Electrochemical Potential-driven Transporters.Porters.Drug/Metabolite Transporter.Nucleobase Uptake Transporter	AT2G03530
Vitvi01g00053	50.5411	2.16249	0.835481	2.58832	0.00964451	0.0283521	Acclimation of photosynthesis to environment	Transport overview.Electrochemical Potential-driven Transporters.Porters.Drug/Metabolite Transporter.Triose-phosphate Transporter	AT5G46110
Vitvi01g00059	37.7676	5.47458	0.783421	6.98805	2.79e-12	6.96e-11	SNAP25A protein	Cellular process.Cellular transport.Protein trafficking.Vesicle-mediated trafficking.SNARE interactions in vesicular transport	AT5G61210
Vitvi01g00066	1700.78	5.98524	0.479848	12.4732	1.05e-35	3.47e-33	Glycosyl hydrolase family 1	Metabolism.Primary metabolism.Carbohydrate metabolism.Carbohydrate catabolism	AT1G26560
Vitvi01g00067	365.501	5.5222	1.19099	4.63664	3.54e-06	2.79e-05	Beta-glucosidase	Metabolism.Cellular metabolism.Amino acid derivative metabolism.Cyanoamino acid metabolism	AT1G26560
Vitvi01g00101	97.9013	5.08928	0.731157	6.96058	3.39e-12	8.25e-11	Zinc transporter ZIP5	Transport overview.Electrochemical Potential-driven Transporters.Porters.Zinc (Zn2+)-Iron (Fe2+) Permease	AT1G05300
Vitvi01g00104	234.663	1.17353	0.368718	3.18274	0.00145886	0.00565641	Polygalacturonase QRT3	Cellular process.Cellular component organization and biogenesis.Cell wall organization and biogenesis.Cell wall metabolism.Cell wall modification.Pectin modification	AT4G20050
Vitvi01g00105	10.1366	2.96289	1.1494	2.57777	0.00994394	0.0290825	Polygalacturonase QRT3	Cellular process.Cellular component organization and biogenesis.Cell wall organization and biogenesis.Cell wall metabolism.Cell wall modification.Pectin modification	AT4G20040
Vitvi01g00141	294.387	-1.86799	0.562553	-3.32057	0.000898354	0.00370535	No hit	No hit
Vitvi01g00146	6115.85	-1.00304	0.249866	-4.01431	5.96e-05	0.000343445	Peptidase, trypsin serine and cysteine proteases	Metabolism.Primary metabolism.Protein metabolism and modification.Proteolysis.Peptidase-mediated proteolysis	AT2G35155
Vitvi01g00147	88.0542	-1.66947	0.371608	-4.49254	7.04e-06	5.17e-05	Unknown protein	Unknown	AT1G31175
Vitvi01g00152	1188.86	-2.23686	0.290346	-7.7041	1.32e-14	4.59e-13	Unknown protein	Unknown	AT2G35140
Vitvi01g00158	191.694	4.16639	0.628497	6.62913	3.38e-11	7.06e-10	Serine carboxypeptidase S10	Metabolism.Primary metabolism.Protein metabolism and modification.Proteolysis.Peptidase-mediated proteolysis	AT5G08260
Vitvi01g00159	308.526	-1.4375	0.300172	-4.78894	1.68e-06	1.42e-05	2-oxo acid dehydrogenase, lipoyl-binding site	Metabolism.Primary metabolism.Carbohydrate metabolism.Glycolysis Gluconeogenesis.Glycolysis
Vitvi01g00160	469.909	2.90675	0.359237	8.09145	5.9e-16	2.45e-14	Serine carboxypeptidase S10	Metabolism.Primary metabolism.Protein metabolism and modification.Proteolysis.Peptidase-mediated proteolysis	AT5G08260
Vitvi01g00162	428.99	-1.10301	0.325366	-3.39007	0.000698751	0.00299126	CYP86B1	Metabolism.Cellular metabolism.Oxidation reduction.Cytochrome P450 oxidoreductase	AT5G23190
Vitvi01g00163	218.237	1.94678	0.53301	3.65243	0.000259773	0.00125804	Ribosomal protein L36a/L44 (RPL36aB) 60S	Metabolism.Primary metabolism.Protein metabolism and modification.Protein synthesis.Ribosome	AT4G14320
Vitvi01g00175	4417.7	1.59121	0.316251	5.03147	4.87e-07	4.67e-06	Glutamine synthetase	Metabolism.Primary metabolism.Amino acid metabolism.Glutamate metabolism	AT5G37600
Vitvi01g00191	50.7934	5.29671	1.27258	4.16217	3.15e-05	0.000195843	Unknown	Unknown
Vitvi01g00198	283.382	1.93376	0.394881	4.89708	9.73e-07	8.77e-06	Calcium-binding protein CML	Response to stimulus.Stress response.Biotic stress response.Plant-pathogen interaction	AT3G25600
Vitvi01g00204	823.557	-1.00815	0.191681	-5.25954	1.44e-07	1.56e-06	Carboxylesterase	Metabolism.Cellular metabolism.Esterase activity	AT1G26120
Vitvi01g00210	3.43424	-5.43813	1.68614	-3.22519	0.0012589	0.00496534	No hit	No hit
Vitvi01g00224	221.247	1.88714	0.474306	3.97874	6.93e-05	0.00039265	CHUP1 (chloroplast unusual positioning 1)	Cellular process.Cellular component organization and biogenesis.Cytoskeleton organization and biogenesis.Actin organization and biogenesis	AT3G25690
Vitvi01g00226	411.913	1.11845	0.289804	3.85934	0.000113692	0.000610499	Cationic amino acid transporter 8	Transport overview.Electrochemical Potential-driven Transporters.Porters.Amino Acid-Polyamine-Organocation.Cationic Amino Acid Transporter	AT1G17120
Vitvi01g00230	234.319	3.82385	0.811425	4.71251	2.45e-06	2e-05	DNA-binding protein, chloroplast nucleoid	Metabolism.Primary metabolism.Nucleobase, nucleoside, nucleotide, nucleic acid metabolism.Nucleic acid metabolism.DNA metabolism	AT3G25700
Vitvi01g00234	4137.24	2.30665	0.389634	5.92004	3.22e-09	4.82e-08	Leucoanthocyanidin reductase 1	Metabolism.Secondary metabolism.Phenylpropanoid metabolism.Flavonoid metabolism.Flavonoid biosynthesis	AT1G75290
Vitvi01g00244	5356.94	1.52996	0.324896	4.70907	2.49e-06	2.03e-05	AP2 domain-containing protein RAP2.8	Signaling.Hormone Signaling.Ethylene Signaling.Ethylene-mediated Signaling pathway	AT1G25560
Vitvi01g00258	465.766	3.06161	0.545856	5.60883	2.04e-08	2.62e-07	Aspartyl protease	Metabolism.Primary metabolism.Protein metabolism and modification.Proteolysis.Peptidase-mediated proteolysis	AT1G25510
Vitvi01g00262	11.6004	4.07963	1.2342	3.30547	0.000948161	0.00388443	Fw2.2 ORFX	Unknown	AT1G49030
Vitvi01g00270	80.8084	1.907	0.409824	4.65321	3.27e-06	2.59e-05	Arabidopsis histidine phosphotransfer AHP2	Signaling.Hormone Signaling.Cytokinin Signaling.Cytokinin-mediated Signaling pathway	AT1G13330
Vitvi01g00277	908.734	1.73124	0.430421	4.0222	5.77e-05	0.000333631	Proton-dependent oligopeptide transport (POT) family protein	Transport overview.Electrochemical Potential-driven Transporters.Porters.Proton-dependent Oligopeptide Transporter	AT1G68570
Vitvi01g00280	2653.86	1.24509	0.286907	4.33971	1.43e-05	9.68e-05	Alpha-glucosidase	Metabolism.Primary metabolism.Carbohydrate metabolism.Monosaccharide metabolism.Galactose metabolism	AT1G68560
Vitvi01g00291	38.2431	3.36499	0.925647	3.63529	0.000277668	0.00133548	Lateral organ boundaries protein 41	Regulation overview.Regulation of gene expression.Regulation of transcription.Transcription factor.AS2 family transcription factor	AT3G02550
Vitvi01g00298	70.7761	3.22926	1.14439	2.82181	0.0047753	0.0156529	Adenylate isopentenyltransferase	Metabolism.Primary metabolism.Lipid metabolism.Steroid metabolism.Steroid biosynthesis	AT1G68460
Vitvi01g00299	405.36	-2.04076	0.681341	-2.99521	0.00274255	0.00971717	IMP dehydrogenase/GMP reductase	Metabolism.Primary metabolism.Nucleobase, nucleoside, nucleotide, nucleic acid metabolism.Nucleotide metabolism.Purine metabolism	AT1G68440
Vitvi01g00300	1973.35	3.83341	0.349704	10.9619	5.83e-28	9.34e-26	Bifunctional nuclease	Metabolism.Primary metabolism.Nucleobase, nucleoside, nucleotide, nucleic acid metabolism.Nucleic acid metabolism.DNA metabolism.DNA catabolism	AT1G68290
Vitvi01g00304	46.1332	1.58038	0.546592	2.89133	0.00383614	0.0129896	Phosphomannose isomerase	Metabolism.Primary metabolism.Carbohydrate metabolism.Monosaccharide metabolism.Fructose and mannose metabolism	AT1G67070
Vitvi01g00305	305.307	2.05824	0.314012	6.55465	5.58e-11	1.12e-09	Unknown protein	Unknown	AT1G68330
Vitvi01g00308	6.49559	5.95939	1.16234	5.12708	2.94e-07	2.97e-06	Unknown	Unknown
Vitvi01g00317	367.168	2.10584	0.596785	3.52864	0.000417694	0.00191007	Unknown protein	Unknown	AT1G68390
Vitvi01g00318	432.797	2.67172	0.306158	8.7266	2.62e-18	1.44e-16	RKL1 (Receptor-like kinase 1)	Signaling.Signaling pathway.Protein kinase	AT1G68400
Vitvi01g00320	600.848	-1.38397	0.267426	-5.17515	2.28e-07	2.36e-06	Sterol-C5(6)-desaturase	Metabolism.Primary metabolism.Lipid metabolism.Steroid metabolism.Steroid biosynthesis	AT3G02580
Vitvi01g00321	161.601	2.17137	0.470987	4.61025	4.02e-06	3.12e-05	Receptor serine/threonine kinase PR5K	Signaling.Signaling pathway.Protein kinase	AT5G38260
Vitvi01g00325	354.085	1.05908	0.415322	2.55003	0.0107713	0.0310982	Protein phosphatase 2C	Signaling.Signaling pathway.Protein phosphatase.PP2C	AT1G68410
Vitvi01g00331	3052.41	6.83856	1.46952	4.65361	3.26e-06	2.59e-05	Reticulon family protein (RTNLB9)	Unclear	AT3G18260
Vitvi01g00335	1028.1	1.0376	0.225514	4.60106	4.2e-06	3.25e-05	Receptor-like kinase RHG1	Signaling.Signaling pathway.Protein kinase	AT2G01210
Vitvi01g00337	559.136	6.494	0.949791	6.8373	8.07e-12	1.85e-10	Zinc finger (C3HC4-type ring finger)	Regulation overview.Regulation of gene expression.Regulation of transcription.Transcription factor.Zinc finger C3HC4 family transcription factor	AT1G17970
Vitvi01g00347	18.6445	7.47606	1.09844	6.8061	1e-11	2.27e-10	Zinc finger (CCCH-type) family protein	Regulation overview.Regulation of gene expression.Regulation of transcription.Transcription factor.C3H family transcription factor	AT1G68200
Vitvi01g00348	143.883	2.55182	0.543491	4.69524	2.66e-06	2.16e-05	Receptor kinase homolog LRK10	Signaling.Signaling pathway.Protein kinase	AT1G66920
Vitvi01g00350	42.9683	4.76549	1.31372	3.62749	0.000286195	0.00137031	Receptor-like kinase ARK1AS	Signaling.Signaling pathway.Protein kinase	AT1G66910
Vitvi01g00384	3179.79	1.89582	0.245449	7.72388	1.13e-14	3.98e-13	Unknown protein	Unknown	AT1G71110
Vitvi01g00386	1217.23	1.14314	0.161227	7.09024	1.34e-12	3.51e-11	Auxin Efflux Carrier	Signaling.Hormone Signaling.Auxin Signaling.Auxin transport
Vitvi01g00389	63.0956	-2.36068	0.572213	-4.12552	3.7e-05	0.000226267	Unknown protein	Unknown	AT2G01300
Vitvi01g00393	941.684	1.58075	0.55306	2.85818	0.00426074	0.014227	Heavy-metal-associated domain-containing protein	Unclear	AT5G17450
Vitvi01g00394	135.284	2.74321	0.377639	7.26409	3.76e-13	1.07e-11	Copper-binding family protein	Unclear	AT1G23000
Vitvi01g00401	1021.05	1.05496	0.260829	4.04464	5.24e-05	0.000306785	Myb domain protein 4	Regulation overview.Regulation of gene expression.Regulation of transcription.Transcription factor.MYB family transcription factor	AT4G38620
Vitvi01g00402	681.595	1.16601	0.296383	3.93413	8.35e-05	0.000464427	Armadillo/beta-catenin repeat / U-box domain-containing protein	Unknown	AT1G23030
Vitvi01g00408	1134.01	-2.67406	0.359238	-7.4437	9.79e-14	3.04e-12	Molecular chaperone DnaJ	Transport overview.Primary Active Transporters.P-P-bond hydrolysis-driven transporters.General Secretory Pathway (Sec)	AT1G56300
Vitvi01g00415	178.509	3.48799	0.619541	5.62996	1.8e-08	2.34e-07	Serine carboxypeptidase-like 50 SCPL50 (	Metabolism.Primary metabolism.Protein metabolism and modification.Proteolysis.Peptidase-mediated proteolysis	AT1G15000
Vitvi01g00417	1243.59	-1.08016	0.283185	-3.81434	0.000136547	0.000715674	MAPK (MPK9)	Signaling.Signaling pathway.Protein kinase.MAPK cascade	AT3G18040
Vitvi01g00423	453.693	-1.95393	0.323881	-6.03287	1.61e-09	2.57e-08	Sulfate transporter 91	Transport overview.Electrochemical Potential-driven Transporters.Porters.Sulfate Permease	AT1G23090
Vitvi01g00427	2.2151	4.40618	1.80033	2.44743	0.0143879	0.0395961	Wuschel related homeobox 1	Regulation overview.Regulation of gene expression.Regulation of transcription.Transcription factor.Homeobox domain family transcription factor	AT3G18010
Vitvi01g00433	139.664	-1.4559	0.339301	-4.29089	1.78e-05	0.000117691	Major latex-like protein 34	Response to stimulus.Stress response.Biotic stress response
Vitvi01g00443	15.5447	6.72399	1.46072	4.60319	4.16e-06	3.22e-05	Phosphoethanolamine N-methyltransferase	Metabolism.Primary metabolism.Lipid metabolism.Glycerolipid metabolism.Glycerophospholipid metabolism	AT1G48600
Vitvi01g00444	5829.64	-1.34913	0.18154	-7.4316	1.07e-13	3.3e-12	GTPase activating protein	Signaling.Signaling pathway.G-protein signaling pathway	AT1G70810
Vitvi01g00449	139.65	1.70107	0.473721	3.59087	0.000329575	0.00155375	Inorganic carbon transport protein	Unclear	AT1G70760
Vitvi01g00457	4135.57	2.37357	0.423156	5.60921	2.03e-08	2.62e-07	Invertase/pectin methylesterase inhibitor	Cellular process.Cellular component organization and biogenesis.Cell wall organization and biogenesis
Vitvi01g00458	875.689	2.19353	0.280573	7.81806	5.36e-15	1.98e-13	Invertase/pectin methylesterase inhibitor	Cellular process.Cellular component organization and biogenesis.Cell wall organization and biogenesis	AT1G14890
Vitvi01g00463	112.782	2.42437	0.516812	4.69101	2.72e-06	2.2e-05	Unknown protein	Unknown	AT1G14870
Vitvi01g00465	912.702	1.65361	0.344732	4.79679	1.61e-06	1.38e-05	PGPS/D12	Unknown	AT1G14870
Vitvi01g00466	704.797	2.07323	0.260376	7.96246	1.69e-15	6.63e-14	Dynein light subunit lc6, flagellar outer arm	Cellular process.Cellular component organization and biogenesis.Cytoskeleton organization and biogenesis.Microtubule organization and biogenesis.Microtubule-driven movement	AT1G23220
Vitvi01g00468	357.925	2.41965	0.239106	10.1196	4.52e-24	4.66e-22	Beta-1,3-glucanase	Metabolism.Primary metabolism.Carbohydrate metabolism.Polysaccharide metabolism.Beta-1,3 glucan metabolism.Beta-1,3 glucan catabolism	AT2G01630
Vitvi01g00481	1177.71	1.05869	0.384852	2.75091	0.00594296	0.0189077	1-aminocyclopropane-1-carboxylate oxidase	Metabolism.Primary metabolism.Organic acid metabolism.Propanoate metabolism	AT2G30840
Vitvi01g00499	6088.22	-1.50368	0.296632	-5.06919	4e-07	3.9e-06	Adagio protein 1	Signaling.Signaling pathway.Circadian clock Signaling	AT1G68050
Vitvi01g00501	420.143	1.97094	0.480555	4.10139	4.11e-05	0.000248174	SEC14 cytosolic factor	Transport overview.Electrochemical Potential-driven Transporters.Porters.Drug/Metabolite Transporter.Triose-phosphate Transporter	AT1G14820
Vitvi01g00508	244.243	1.79547	0.381726	4.70356	2.56e-06	2.08e-05	NSL1 (necrotic spotted lesions 1)	Cellular process.Cell growth and death.Cell death	AT1G14780
Vitvi01g00513	150.526	2.91873	0.567924	5.13929	2.76e-07	2.8e-06	Vacuolar iron transporter 1	Transport overview.Electrochemical Potential-driven Transporters.Porters.Vacuolar Iron Transporter	AT2G01770
Vitvi01g00519	230.434	1.01845	0.221227	4.60365	4.15e-06	3.21e-05	PLATZ transcription factor	Regulation overview.Regulation of gene expression.Regulation of transcription.Transcription factor.PLATZ family transcription factor	AT2G01818
Vitvi01g00521	4502.92	1.22881	0.173667	7.07568	1.49e-12	3.86e-11	Lectin protein kinase family	Signaling.Signaling pathway.Protein kinase	AT1G34300
Vitvi01g00526	1493.71	1.33274	0.208018	6.40683	1.49e-10	2.78e-09	Receptor protein kinase	Signaling.Signaling pathway.Protein kinase	AT1G66150
Vitvi01g00532	806.428	3.22274	0.374492	8.60563	7.59e-18	3.92e-16	Cytochrome B561	Transport overview.Transmembrane Electron Carriers.Transmembrane 1-electron transfer carriers.Eukaryotic Cytochrome b561	AT1G14730
Vitvi01g00539	397.361	3.17001	0.572062	5.54138	3e-08	3.72e-07	Purple acid phosphatase 3 ATPAP3/PAP3	Metabolism.Primary metabolism.Coenzyme and prosthetic group metabolism.Riboflavin metabolism	AT1G14700
Vitvi01g00556	4033.37	-1.51439	0.357645	-4.23435	2.29e-05	0.000147413	Deoxymugineic acid synthase	Metabolism.Primary metabolism.Amino acid metabolism.Methionine metabolism	AT1G59950
Vitvi01g00567	776.455	1.47032	0.227084	6.47479	9.49e-11	1.82e-09	No hit	No hit
Vitvi01g00568	3547.38	-1.87782	0.326431	-5.75258	8.79e-09	1.22e-07	Glutamate decarboxylase	Metabolism.Primary metabolism.Amino acid metabolism.Glutamate metabolism.Glutamate catabolism	AT5G17330
Vitvi01g00589	4461.49	1.49069	0.247025	6.03456	1.59e-09	2.54e-08	Photosystem II core complex proteins psbY, chloroplast precursor	Metabolism.Primary metabolism.Generation of metabolite precursors and energy.Photosynthesis.Photosystem II	AT1G67740
Vitvi01g00603	34.8117	-1.69413	0.60187	-2.81478	0.00488106	0.0159432	Cysteine proteinase	Metabolism.Primary metabolism.Protein metabolism and modification.Proteolysis.Peptidase-mediated proteolysis	AT5G50260
Vitvi01g00609	50.6161	2.25069	0.574673	3.91648	8.99e-05	0.000495948	No hit	No hit
Vitvi01g00610	368.992	4.15344	0.760394	5.46223	4.7e-08	5.57e-07	Unknown protein	Unknown	AT3G01680
Vitvi01g00611	274.446	2.03053	0.410152	4.95067	7.4e-07	6.86e-06	Unknown protein	Unknown	AT1G67790
Vitvi01g00612	4.15008	5.31252	1.91974	2.76732	0.00565191	0.0181105	CYP86A2	Metabolism.Cellular metabolism.Oxidation reduction.Cytochrome P450 oxidoreductase	AT1G24540
Vitvi01g00615	23.3447	2.98381	1.12637	2.64904	0.00807199	0.0244801	SEC14 cytosolic factor	Transport overview.Electrochemical Potential-driven Transporters.Porters.Drug/Metabolite Transporter.Triose-phosphate Transporter	AT3G51670
Vitvi01g00617	1113.35	2.02156	0.21914	9.22495	2.84e-20	1.92e-18	CYP71B10	Metabolism.Secondary metabolism.Phenylpropanoid metabolism.Phenylpropanoid biosynthesis	AT3G26300
Vitvi01g00620	107.138	1.16973	0.44562	2.62494	0.00866639	0.0259843	CYP71B34	Metabolism.Secondary metabolism.Terpenoid metabolism.Monoterpenoid metabolism.Monoterpenoid biosynthesis	AT3G26300
Vitvi01g00635	149.78	1.92222	0.438569	4.38293	1.17e-05	8.12e-05	Alpha-L-fucosidase 2 precursor	Metabolism.Primary metabolism.Carbohydrate metabolism.Oligosaccharide metabolism.N-Glycan metabolism.N-Glycan catabolism	AT3G26430
Vitvi01g00639	39.4183	2.66685	0.996196	2.67703	0.00742774	0.0228057	No hit	No hit
Vitvi01g00646	2464.3	2.65664	0.389381	6.82273	8.93e-12	2.04e-10	Octicosapeptide/Phox/Bem1p (PB1) domain-containing protein	Unknown	AT3G26510
Vitvi01g00647	492.883	2.12203	0.356152	5.9582	2.55e-09	3.9e-08	Inorganic phosphate transporter 2-1, chloroplast precursor	Transport overview.Electrochemical Potential-driven Transporters.Porters.Major Facilitator Superfamily.Phosphate: H+ Symporter	AT3G26570
Vitvi01g00648	425.632	-1.30313	0.288739	-4.51317	6.39e-06	4.73e-05	Unknown protein	Unknown	AT1G70630
Vitvi01g00649	1989.05	-1.1339	0.241623	-4.69287	2.69e-06	2.18e-05	Cyclin-related	Cellular process.Cell growth and death	AT1G70620
Vitvi01g00657	195.742	1.56797	0.517487	3.02996	0.00244584	0.00880711	MATE efflux family protein	Transport overview.Electrochemical Potential-driven Transporters.Porters.Multidrug/Oligosaccharidyl-lipid/Polysaccharide Flippase.Multi Antimicrobial Extrusion	AT1G12950
Vitvi01g00658	5340.97	1.0047	0.342583	2.93271	0.00336014	0.0115938	Copper amine oxidase	Metabolism.Primary metabolism.Amino acid metabolism.Arginine and proline metabolism.Urea cycle	AT2G42490
Vitvi01g00676	465.623	1.51242	0.253148	5.97447	2.31e-09	3.57e-08	No hit	No hit
Vitvi01g00681	19972.5	-1.61393	0.174066	-9.27193	1.83e-20	1.28e-18	Alpha-glucan water dikinase, chloroplast precursor	Transport overview.Accessory factors involved in transport.Auxiliary transport proteins.Phosphotransferase System Enzyme I	AT1G10760
Vitvi01g00683	17.5171	-1.82962	0.772493	-2.36846	0.0178625	0.0475166	No hit	No hit
Vitvi01g00687	199.175	-1.2475	0.393139	-3.17318	0.00150782	0.00581338	Cysteine-rich receptor-like protein kinase 2	Signaling.Signaling pathway.Protein kinase	AT1G70520
Vitvi01g00697	721.015	-1.35888	0.419905	-3.23616	0.00121151	0.00480084	Kelch repeat-containing F-box protein	Unknown	AT1G23390
Vitvi01g00708	473.748	2.12141	0.408856	5.18866	2.12e-07	2.2e-06	Pentatricopeptide (PPR) repeat	Diverse functions.Gene family with diverse functions.Pentatricopeptide domain family	AT1G74600
Vitvi01g00710	182.218	5.9478	1.26159	4.71455	2.42e-06	1.98e-05	Polygalacturonase GH28	Cellular process.Cellular component organization and biogenesis.Cell wall organization and biogenesis.Cell wall metabolism.Cell wall modification.Pectin modification	AT1G60590
Vitvi01g00714	936.935	4.07775	0.877141	4.64891	3.34e-06	2.64e-05	Galactinol synthase	Metabolism.Primary metabolism.Carbohydrate metabolism.Monosaccharide metabolism.Galactose metabolism	AT1G60470
Vitvi01g00719	71.8405	3.4078	0.749768	4.54514	5.49e-06	4.12e-05	Protein disulfide isomerase	Metabolism.Primary metabolism.Protein metabolism and modification.Protein folding.Disulfide bond rearrangement	AT1G60420
Vitvi01g00722	3120.79	-1.37595	0.269999	-5.09615	3.47e-07	3.44e-06	DC1 domain-containing protein	Unknown	AT1G60420
Vitvi01g00729	675.589	-2.30576	0.312698	-7.37377	1.66e-13	4.95e-12	SRO2 (similar to rcd one 2)	Metabolism.Primary metabolism.Coenzyme and prosthetic group metabolism.Nicotinate and nicotinamide metabolism	AT1G23550
Vitvi01g00730	49.116	-1.44443	0.566843	-2.54821	0.0108277	0.0312426	MAP4K alpha1	Signaling.Signaling pathway.Protein kinase.MAPK cascade	AT5G14720
Vitvi01g00732	378.509	-1.46924	0.343042	-4.28297	1.84e-05	0.000121534	Unknown protein	Unknown	AT1G23710
Vitvi01g00742	123.168	4.90412	1.37886	3.55664	0.000375629	0.00174075	Polyamine oxidase precursor	Metabolism.single reactions	AT5G13700
Vitvi01g00745	129.428	3.50698	0.472168	7.4274	1.11e-13	3.4e-12	Polygalacturonase BURP	Cellular process.Cellular component organization and biogenesis.Cell wall organization and biogenesis.Cell wall metabolism.Cell wall modification.Pectin modification	AT1G70370
Vitvi01g00747	667.213	5.15539	0.422716	12.1959	3.27e-34	9.33e-32	Polygalacturonase JP630	Cellular process.Cellular component organization and biogenesis.Cell wall organization and biogenesis.Cell wall metabolism.Cell wall modification.Pectin modification	AT1G23760
Vitvi01g00753	9.12504	3.78589	1.149	3.29495	0.000984397	0.00401701	No hit	No hit
Vitvi01g00770	172.498	4.16975	0.535721	7.78343	7.06e-15	2.54e-13	Unknown protein	Unknown	AT1G23790
Vitvi01g00782	501.369	-1.2008	0.358363	-3.35078	0.000805833	0.00338463	Armadillo/beta-catenin repeat	Unknown	AT1G60190
Vitvi01g00796	367.703	-1.42142	0.2981	-4.76828	1.86e-06	1.56e-05	Zinc finger (C3HC4-type ring finger)	Regulation overview.Regulation of gene expression.Regulation of transcription.Transcription factor.Zinc finger C3HC4 family transcription factor	AT5G40250
Vitvi01g00799	623.259	1.4936	0.23957	6.23451	4.53e-10	7.86e-09	NHL repeat-containing protein	Unknown	AT1G70280
Vitvi01g00808	64.9208	-1.43026	0.520527	-2.74772	0.00600113	0.0190651	D8-sphingolipid desaturase	Unclear
Vitvi01g00810	2.96154	4.81912	1.80357	2.67199	0.00754019	0.0230932	Nodulin	Response to stimulus.Stress response.Biotic stress response	AT3G28050
Vitvi01g00817	59.4198	3.60797	0.928516	3.88574	0.00010202	0.000554866	Receptor protein kinase	Signaling.Signaling pathway.Protein kinase	AT1G24030
Vitvi01g00822	445.581	6.36277	0.737247	8.63044	6.11e-18	3.21e-16	N-hydroxythioamide S-beta-glucosyltransferase	Metabolism.Secondary metabolism.Primary amino acids derivated metabolism.Glucosinolate metabolism	AT1G24100
Vitvi01g00830	2804.49	-1.03495	0.181622	-5.69837	1.21e-08	1.63e-07	Cyclin delta-2	Cellular process.Cell growth and death	AT1G70210
Vitvi01g00833	1221.41	1.83815	0.239596	7.67184	1.7e-14	5.83e-13	Nucleobase-ascorbate transporter 6 (NAT6)	Transport overview.Electrochemical Potential-driven Transporters.Porters.Nucleobase:Cation Symporter-2	AT5G62890
Vitvi01g00857	1016.56	-1.141	0.268321	-4.25236	2.12e-05	0.000137445	ARR3 typeA	Signaling.Hormone Signaling.Cytokinin Signaling.Cytokinin-mediated Signaling pathway	AT1G10470
Vitvi01g00864	164.487	2.37719	0.39482	6.02093	1.73e-09	2.74e-08	Binding	Unknown	AT1G27210
Vitvi01g00867	2320.43	1.19076	0.233414	5.1015	3.37e-07	3.35e-06	Myb family	Regulation overview.Regulation of gene expression.Regulation of transcription.Transcription factor.MYB-related family transcription factor	AT1G70000
Vitvi01g00875	51.2093	2.4766	1.02922	2.40628	0.0161157	0.0435546	R protein L6	Response to stimulus.Stress response.Biotic stress response.Plant-pathogen interaction.R proteins from Plant-pathogen interaction	AT1G27170
Vitvi01g00886	791.726	1.11333	0.236031	4.71687	2.39e-06	1.96e-05	Unknown protein	Unknown	AT1G74790
Vitvi01g00889	3970.38	3.84466	0.941164	4.08501	4.41e-05	0.000263563	Glutathione S-transferase 29 GSTU18	Metabolism.Primary metabolism.Coenzyme and prosthetic group metabolism.Peptide derived compounds biosynthesis.Glutathione metabolism	AT1G10360
Vitvi01g00893	100.187	1.80211	0.605253	2.97745	0.00290657	0.0102139	Glutathione S-transferase 29 GSTU18	Metabolism.Primary metabolism.Coenzyme and prosthetic group metabolism.Peptide derived compounds biosynthesis.Glutathione metabolism	AT1G10360
Vitvi01g00907	11696.9	-1.53072	0.330307	-4.63424	3.58e-06	2.81e-05	Thioredoxin H-type 2 (Trx-H-2)	Cellular process.Cellular homeostasis.Cell redox homeostasis	AT5G39950
Vitvi01g00911	1708.54	1.52268	0.538417	2.82806	0.00468308	0.0154065	Proton-dependent oligopeptide transport (POT) family protein	Transport overview.Electrochemical Potential-driven Transporters.Porters.Proton-dependent Oligopeptide Transporter	AT1G69870
Vitvi01g00940	143.832	1.63834	0.583561	2.80749	0.00499298	0.0162521	WRKY DNA-binding protein 72	Regulation overview.Regulation of gene expression.Regulation of transcription.Transcription factor.WRKY family transcription factor	AT5G15130
Vitvi01g00953	148.535	-1.01744	0.341384	-2.98035	0.00287924	0.0101356	Avr9/Cf-9 induced kinase 1	Response to stimulus.Stress response.Biotic stress response	AT2G02800
Vitvi01g00958	447.746	2.3326	0.58888	3.96108	7.46e-05	0.000419667	Homeobox-leucine zipper protein HB13	Regulation overview.Regulation of gene expression.Regulation of transcription.Transcription factor.Homeobox domain family transcription factor	AT1G69780
Vitvi01g00965	9.71408	6.53584	1.56833	4.16738	3.08e-05	0.000192019	No hit	No hit
Vitvi01g00979	3868.59	2.27783	0.313259	7.27139	3.56e-13	1.02e-11	ABA-responsive protein (HVA22c)	Signaling.Hormone Signaling.ABA Signaling.ABA-mediated Signaling pathway	AT1G74520
Vitvi01g00980	199.231	3.1563	0.517456	6.09965	1.06e-09	1.74e-08	TCP family transcription factor TCP15	Regulation overview.Regulation of gene expression.Regulation of transcription.Transcription factor.TCP family transcription factor	AT1G69690
Vitvi01g00989	507.137	3.60422	0.485298	7.42681	1.11e-13	3.41e-12	Kinase	Signaling.Signaling pathway.Protein kinase
Vitvi01g00994	942.514	4.68396	1.16226	4.03006	5.58e-05	0.000323591	Phytochrome kinase substrate	Response to stimulus.Stress response.Biotic stress response	AT2G02950
Vitvi01g00995	6578.22	1.06166	0.317455	3.34428	0.000824957	0.00345078	Ankyrin protein kinase	Diverse functions.Gene family with diverse functions.Ankyrin domain family	AT1G26850
Vitvi01g01007	64.3903	3.08012	0.98065	3.14089	0.00168434	0.0063995	Glutathione S-transferase 10 GSTU10	Metabolism.Primary metabolism.Coenzyme and prosthetic group metabolism.Peptide derived compounds biosynthesis.Glutathione metabolism	AT1G74590
Vitvi01g01027	68.3392	1.90728	0.63875	2.98596	0.00282691	0.00998434	Calcium-binding protein CML	Response to stimulus.Stress response.Biotic stress response.Plant-pathogen interaction	AT3G29000
Vitvi01g01030	4887.69	3.02042	0.570316	5.29604	1.18e-07	1.3e-06	Expansin [Vitis labrusca x Vitis vinifera] EXPA15	Signaling.Hormone Signaling.Auxin Signaling.Auxin-mediated Signaling pathway	AT1G26770
Vitvi01g01048	288.912	-1.87299	0.366362	-5.1124	3.18e-07	3.18e-06	No hit	No hit
Vitvi01g01085	247.481	3.69668	0.831829	4.44403	8.83e-06	6.32e-05	Unknown protein	Unknown	AT1G26760
Vitvi01g01165	1739.67	1.25333	0.382049	3.28053	0.00103611	0.00420007	DREPP plasma membrane polypeptide	Unclassified	AT4G20260
Vitvi01g01173	2473.5	-1.30941	0.217262	-6.02684	1.67e-09	2.66e-08	Unknown protein	Unknown	AT5G44670
Vitvi01g01258	229.006	2.92189	0.356317	8.20026	2.4e-16	1.05e-14	Clavata1 receptor kinase (CLV1)	Signaling.Signaling pathway.Protein kinase	AT4G20270
Vitvi01g01259	72.9035	1.39692	0.308655	4.52585	6.02e-06	4.47e-05	EDA18 (embryo sac development arrest 18)	Development.Reproductive development.Embryo development	AT5G44690
Vitvi01g01268	840.332	-1.0622	0.158765	-6.69039	2.23e-11	4.74e-10	WD-40 repeat protein	Unknown	AT5G17370
Vitvi01g01282	1108.65	2.64772	0.230602	11.4817	1.63e-30	3.33e-28	Unknown protein	Unknown	AT2G03350
Vitvi01g01284	2.5517	4.60827	1.79146	2.57235	0.0101011	0.0294649	UDP-glucoronosyl and UDP-glucosyl transferase	Unclear	AT3G22250
Vitvi01g01301	68.5089	3.34011	0.538338	6.20448	5.49e-10	9.41e-09	DNA glycosylase	Metabolism.Primary metabolism.Nucleobase, nucleoside, nucleotide, nucleic acid metabolism.Nucleic acid metabolism.DNA metabolism	AT1G13635
Vitvi01g01307	79.8691	9.57619	0.889199	10.7695	4.8e-27	7.18e-25	Esterase/lipase/thioesterase	Unclear	AT3G30380
Vitvi01g01313	319.285	1.1469	0.479344	2.39264	0.0167274	0.0449701	Armadillo/beta-catenin repeat protein / U-box domain-containing protein,	Unknown	AT1G68940
Vitvi01g01351	2517.02	1.52871	0.217689	7.02243	2.18e-12	5.53e-11	NIK1 (NSP- interacting kinase 1)	Signaling.Signaling pathway.Protein kinase	AT5G16000
Vitvi01g01373	202.858	1.08166	0.453635	2.38443	0.0171057	0.0458212	YGGT	Unknown	AT5G36120
Vitvi01g01376	2405.37	1.42785	0.169203	8.43869	3.21e-17	1.57e-15	Cell elongation protein / DWARF1 / DIMINUTO (DIM)	Metabolism.Primary metabolism.Lipid metabolism.Steroid metabolism.Steroid biosynthesis	AT3G19820
Vitvi01g01378	264.496	1.08981	0.166416	6.54869	5.8e-11	1.16e-09	Uracil-DNA glycosylase	Metabolism.Primary metabolism.Nucleobase, nucleoside, nucleotide, nucleic acid metabolism.Nucleic acid metabolism.DNA metabolism	AT3G18630
Vitvi01g01388	1465.88	-1.82065	0.304179	-5.98547	2.16e-09	3.35e-08	23S ribosomal RNA	Metabolism.Primary metabolism.Protein metabolism and modification.Protein synthesis.Ribosome
Vitvi01g01404	449.657	4.82632	1.09027	4.42674	9.57e-06	6.79e-05	Phototropic-responsive NPH3	Signaling.Signaling pathway.Light Signaling	AT3G19850
Vitvi01g01434	230.836	1.62395	0.561033	2.89457	0.00379682	0.012876	Receptor protein kinase	Signaling.Signaling pathway.Protein kinase	AT1G10850
Vitvi01g01435	169.053	1.24337	0.317774	3.91276	9.12e-05	0.000502637	Zinc knuckle	Metabolism.Primary metabolism.Nucleobase, nucleoside, nucleotide, nucleic acid metabolism.Nucleic acid metabolism	AT3G02820
Vitvi01g01458	593.117	1.44676	0.252782	5.72334	1.04e-08	1.42e-07	Regulator of nonsense transcripts 1	Metabolism.Primary metabolism.Nucleobase, nucleoside, nucleotide, nucleic acid metabolism.Nucleic acid metabolism.RNA metabolism.tRNA metabolism.tRNA processing	AT1G65780
Vitvi01g01476	82983	-1.33275	0.30198	-4.41336	1.02e-05	7.18e-05	Gamma-thionin precursor	Response to stimulus.Stress response.Biotic stress response	AT2G02100
Vitvi01g01493	92.5583	4.53971	1.08445	4.18618	2.84e-05	0.000178377	Indeterminate(ID)-domain 5	Regulation overview.Regulation of gene expression.Regulation of transcription.Transcription factor.C2H2 family transcription factor	AT2G02070
Vitvi01g01507	146.983	5.12475	0.804121	6.37311	1.85e-10	3.41e-09	Unknown protein	Unknown	AT5G40700
Vitvi01g01534	285.667	4.27351	0.473384	9.02759	1.76e-19	1.1e-17	Mitotic spindle checkpoint protein (MAD2)	Signaling.Signaling pathway.Protein kinase.MAPK cascade	AT3G25980
Vitvi01g01536	207.684	1.65	0.584489	2.82297	0.00475806	0.0156072	ABC transporter C member 9	Transport overview.Macromolecule transport.Multidrug transport.Multidrug ABC transport	AT3G13080
Vitvi01g01540	1912	1.09438	0.198471	5.51406	3.51e-08	4.29e-07	Ankyrin repeat	Transport overview.Accessory factors involved in transport.Auxiliary transport proteins.Ankyrin	AT3G01750
Vitvi01g01550	58.1574	1.82346	0.573804	3.17785	0.00148369	0.00573215	ATP-dependent DNA helicase RecQ	Metabolism.Primary metabolism.Nucleobase, nucleoside, nucleotide, nucleic acid metabolism.Nucleic acid metabolism.DNA metabolism.DNA recombination and repair.recombination	AT1G27880
Vitvi01g01559	96.1171	2.56607	0.337474	7.60376	2.88e-14	9.56e-13	DNA polymerase alpha, subunit B	Metabolism.Primary metabolism.Nucleobase, nucleoside, nucleotide, nucleic acid metabolism.Nucleic acid metabolism.DNA metabolism.DNA replication	AT1G67630
Vitvi01g01567	1377.24	1.36518	0.147083	9.28169	1.67e-20	1.17e-18	Unknown protein	Unknown	AT3G01810
Vitvi01g01573	382.576	-1.35643	0.295446	-4.59114	4.41e-06	3.39e-05	Chaperone BCS1 mitochondrial	Metabolism.Primary metabolism.Protein metabolism and modification.Protein folding.Chaperone-mediated protein folding	AT3G50940
Vitvi01g01576	3147.08	1.05578	0.20458	5.16074	2.46e-07	2.54e-06	Armadillo/beta-catenin repeat protein / U-box domain-containing	Unknown	AT1G24330
Vitvi01g01621	2756.86	-1.07358	0.196437	-5.46529	4.62e-08	5.49e-07	Kelch repeat-containing F-box protein	Unknown	AT1G67480
Vitvi01g01641	225.369	2.08341	0.448944	4.64069	3.47e-06	2.74e-05	Microtubule associated protein (MAP65-6)	Cellular process.Cellular component organization and biogenesis.Cytoskeleton organization and biogenesis.Microtubule organization and biogenesis.Microtubule-driven movement	AT1G27920
Vitvi01g01642	86.7252	1.40176	0.340359	4.11847	3.81e-05	0.000232723	Nuclear transcription factor Y subunit B related	Regulation overview.Regulation of gene expression.Regulation of transcription.Transcription factor.CCAAT family transcription factor.HAP3-type-type	AT5G43250
Vitvi01g01644	18172.7	-3.84749	0.726568	-5.29543	1.19e-07	1.31e-06	CYP78A5	Metabolism.Cellular metabolism.Oxidation reduction.Cytochrome P450 oxidoreductase	AT1G13710
Vitvi01g01648	4786.35	1.73785	0.41551	4.18244	2.88e-05	0.000181012	LHCA2 (Photosystem I light harvesting complex gene 2)	Metabolism.Primary metabolism.Generation of metabolite precursors and energy.Photosynthesis.Antenna proteins
Vitvi01g01655	498.322	1.63456	0.471888	3.46388	0.000532446	0.00236301	Unknown protein	Unknown	AT1G27930
Vitvi01g01660	1441.76	1.783	0.259502	6.87085	6.38e-12	1.49e-10	Squamosa promoter-binding protein 2 (SPL2)	Regulation overview.Regulation of gene expression.Regulation of transcription.Transcription factor.SBP family transcription factor	AT5G43270
Vitvi01g01684	411.795	4.14536	0.474318	8.73961	2.34e-18	1.29e-16	Unknown	Unknown
Vitvi01g01686	1491.19	1.55542	0.234696	6.62738	3.42e-11	7.13e-10	Unknown protein	Unknown
Vitvi01g01687	6.66574	-6.39607	2.43796	-2.62353	0.00870241	0.0260739	Unknown protein	Unknown	AT1G27990
Vitvi01g01701	1193.85	10.1843	1.3173	7.73116	1.07e-14	3.77e-13	11-beta-hydroxysteroid dehydrogenase	Metabolism.Primary metabolism.Lipid metabolism.Steroid metabolism.C21-Steroid hormone metabolism	AT5G50700
Vitvi01g01711	8548.59	-1.31002	0.483868	-2.70739	0.00678145	0.0211604	Auxin responsive SAUR protein	Signaling.Hormone Signaling.Auxin Signaling.Auxin-mediated Signaling pathway
Vitvi01g01714	336.005	5.81295	1.23543	4.70519	2.54e-06	2.06e-05	No hit	No hit
Vitvi01g01729	1253.42	1.06897	0.145668	7.3384	2.16e-13	6.32e-12	Constans-like 14	Development.Reproductive development.Flower development	AT2G33500
Vitvi01g01733	609.607	1.42881	0.453704	3.14922	0.00163707	0.00624505	Humj1	Unknown	AT2G33510
Vitvi01g01734	2808.33	-2.01251	0.368884	-5.45567	4.88e-08	5.76e-07	GEM-like protein 5	Cellular process.Cell growth and death	AT5G13200
Vitvi01g01737	138.968	1.83516	0.584579	3.13928	0.00169366	0.00643093	Unknown protein	Unknown	AT5G13210
Vitvi01g01748	164.226	2.39752	0.503736	4.75949	1.94e-06	1.62e-05	ACP4 (Acyl carrier protein 4)	Transport overview.Primary Active Transporters.Oxidoreduction-driven transporters.Proton-translocating NADH Dehydrogenase	AT4G25050
Vitvi01g01751	86.5652	-1.70294	0.60446	-2.81729	0.00484303	0.0158393	feronia receptor-like kinase	Signaling.Signaling pathway.Protein kinase	AT3G51550
Vitvi01g01753	278.11	1.55971	0.232197	6.71722	1.85e-11	3.99e-10	Serine carboxypeptidase S10	Metabolism.Primary metabolism.Protein metabolism and modification.Proteolysis.Peptidase-mediated proteolysis	AT1G28110
Vitvi01g01764	542.961	2.59434	0.638037	4.06612	4.78e-05	0.000282604	SOUL heme-binding	Transport overview.Macromolecule transport.Heme prostetic groups trafficking	AT1G17100
Vitvi01g01773	1079.94	1.04459	0.194749	5.36378	8.15e-08	9.23e-07	ORTH2/VIM1 (variant in methylation 1)	Regulation overview.Regulation of gene expression.Regulation of transcription.Transcription factor.SET PCG family transcription factor	AT1G57820
Vitvi01g01789	559.381	1.06803	0.310071	3.44447	0.000572181	0.00251795	Unknown protein	Unknown	AT3G23760
Vitvi01g01793	2272.26	2.09271	0.233362	8.96766	3.03e-19	1.84e-17	Nudix hydrolase 13	Metabolism.Primary metabolism.Nucleobase, nucleoside, nucleotide, nucleic acid metabolism.Nudix hydrolase family	AT1G12880
Vitvi01g01794	349.258	3.87606	0.393649	9.84649	7.1e-23	6.45e-21	U-box domain-containing protein	Unknown
Vitvi01g01796	638.826	3.30824	0.381519	8.67124	4.27e-18	2.28e-16	Zinc finger (DHHC type)	Regulation overview.Regulation of gene expression.Regulation of transcription.Transcription factor.Zinc finger DHHC family transcription factor	AT3G26935
Vitvi01g01797	355.642	-2.1397	0.295801	-7.2336	4.7e-13	1.31e-11	Unknown	Unknown
Vitvi01g01799	533.622	4.22954	0.465651	9.08308	1.06e-19	6.83e-18	Minichromosome maintenance protein 2	Metabolism.Primary metabolism.Nucleobase, nucleoside, nucleotide, nucleic acid metabolism.Nucleic acid metabolism.DNA metabolism.DNA replication	AT1G44900
Vitvi01g01801	478.55	1.50201	0.424417	3.53899	0.000401661	0.00184639	Unknown protein	Unknown
Vitvi01g01805	3323.22	3.37926	0.297907	11.3434	8e-30	1.55e-27	Xyloglucan endotransglucosylase/hydrolase precursor	Cellular process.Cellular component organization and biogenesis.Cell wall organization and biogenesis.Cell wall metabolism.Cell wall modification.Xyloglucan modification	AT5G13870
Vitvi01g01808	4193.98	-1.23313	0.205558	-5.99897	1.99e-09	3.1e-08	No hit	No hit
Vitvi01g01810	80.3089	2.91332	0.439221	6.63292	3.29e-11	6.89e-10	Unknown protein	Unknown	AT3G50120
Vitvi01g01822	113.05	1.01414	0.395908	2.56155	0.0104206	0.0302328	Exostosin-like	Metabolism.Primary metabolism.Carbohydrate metabolism.Oligosaccharide metabolism.Glycan metabolism.Glycan structures-biosynthesis1	AT4G38040
Vitvi01g01826	779.891	1.37332	0.53233	2.57982	0.00988513	0.028945	Ethylene-responsive transcription factor ERF114	Signaling.Hormone Signaling.Ethylene Signaling.Ethylene-mediated Signaling pathway	AT5G61890
Vitvi01g01835	60.9569	4.9648	0.74521	6.66228	2.7e-11	5.71e-10	Universal stress protein (USP) family protein	Response to stimulus.Stress response	AT2G03720
Vitvi01g01844	2662.72	1.1768	0.245596	4.7916	1.65e-06	1.41e-05	WRKY DNA-binding protein 57	Regulation overview.Regulation of gene expression.Regulation of transcription.Transcription factor.WRKY family transcription factor	AT1G69310
Vitvi01g01846	6106.31	2.16333	0.39011	5.54544	2.93e-08	3.65e-07	Nodulin	Response to stimulus.Stress response.Biotic stress response
Vitvi01g01848	18.8674	7.49455	1.86558	4.01728	5.89e-05	0.000339583	RPM1 (resistance to p. syringae pv maculicola 1)	Response to stimulus.Stress response.Biotic stress response.Plant-pathogen interaction	AT3G07040
Vitvi01g01849	47.5329	4.78208	1.39196	3.43551	0.00059143	0.00258918	RPM1 (resistance to p. syringae pv maculicola 1)	Response to stimulus.Stress response.Biotic stress response.Plant-pathogen interaction	AT3G07040
Vitvi01g01853	7.24795	6.11384	2.00428	3.0504	0.00228539	0.00831725	No hit	No hit
Vitvi01g01859	3884.09	2.89293	0.476051	6.07693	1.23e-09	1.98e-08	Cationic amino acid transporter 5	Transport overview.Electrochemical Potential-driven Transporters.Porters.Amino Acid-Polyamine-Organocation.Cationic Amino Acid Transporter	AT2G34960
Vitvi01g01877	10632.3	-1.447	0.270816	-5.34312	9.14e-08	1.03e-06	ATPP2-A9 (Phloem protein 2-A9)	Unclassified	AT1G31200
Vitvi01g01879	310.365	-1.30086	0.354439	-3.67019	0.000242373	0.00118335	No hit	No hit
Vitvi01g01884	1468.15	-2.30447	0.434139	-5.30814	1.11e-07	1.23e-06	Galactose-binding like	Unknown	AT4G19840
Vitvi01g01887	530.949	6.00511	0.456026	13.1683	1.33e-39	5.55e-37	Phosphate-induced protein 1	Unclear	AT2G35150
Vitvi01g01901	16.5239	7.30304	1.57244	4.64439	3.41e-06	2.69e-05	Unknown	Unknown
Vitvi01g01902	157.809	6.98117	1.71724	4.06534	4.8e-05	0.000283414	Unknown	Unknown
Vitvi01g01904	78.0242	-1.07741	0.364801	-2.95342	0.00314273	0.0109345	Metal-dependent phosphohydrolase HD domain-containing protein-like	Unclassified	AT1G26160
Vitvi01g01907	22.9227	3.80532	1.00229	3.79663	0.000146677	0.000761932	No hit	No hit
Vitvi01g01908	644.898	-1.76065	0.440841	-3.99385	6.5e-05	0.000370921	No hit	No hit
Vitvi01g01912	38.8668	4.40622	0.982944	4.48267	7.37e-06	5.39e-05	No hit	No hit
Vitvi01g01915	208.358	4.48376	0.695004	6.45142	1.11e-10	2.1e-09	No hit	No hit
Vitvi01g01917	22.5797	2.70109	0.911178	2.96439	0.00303283	0.0106062	No hit	No hit
Vitvi01g01918	868.711	1.73927	0.382721	4.54449	5.51e-06	4.13e-05	No hit	No hit
Vitvi01g01919	395.488	1.63586	0.575385	2.84307	0.00446817	0.0147928	No hit	No hit
Vitvi01g01920	53.3193	-1.31715	0.442346	-2.97765	0.00290466	0.0102119	Unknown	Unknown
Vitvi01g01921	7.70854	6.20319	1.68149	3.68911	0.000225042	0.00110733	Myb-related protein 3R-1 (Plant c-MYB-like protein 1) MYB3R1	Cellular process.Cell growth and death
Vitvi01g01922	31824.8	-2.33144	0.332426	-7.01342	2.33e-12	5.86e-11	No hit	No hit
Vitvi01g01923	18720.9	-2.61878	0.390085	-6.71334	1.9e-11	4.08e-10	No hit	No hit
Vitvi01g01928	423.007	1.14122	0.255889	4.45985	8.2e-06	5.93e-05	No hit	No hit
Vitvi01g01930	9.9536	6.08027	1.19024	5.10844	3.25e-07	3.24e-06	Unknown protein	Unknown	AT4G15830
Vitvi01g01931	106.417	-1.20839	0.377372	-3.20213	0.00136415	0.00533503	No hit	No hit
Vitvi01g01932	1277.61	-1.32022	0.223417	-5.90924	3.44e-09	5.12e-08	Unknown	Unknown
Vitvi01g01941	78.6278	-2.31963	0.652241	-3.5564	0.000375979	0.00174204	Map kinase substrate 1 MKS1	Signaling.Signaling pathway.Protein kinase.MAPK cascade
Vitvi01g01973	400.426	1.94972	0.417113	4.67432	2.95e-06	2.36e-05	Serine carboxypeptidase CPVL precursor	Metabolism.Primary metabolism.Protein metabolism and modification.Proteolysis.Peptidase-mediated proteolysis	AT1G15000
Vitvi01g01979	311.17	7.80402	2.2655	3.44473	0.000571631	0.00251598	Bet v I allergen	Response to stimulus.Stress response.Biotic stress response	AT1G70830
Vitvi01g01980	1252.3	2.70908	0.417078	6.49539	8.28e-11	1.61e-09	Major Latex Protein Family	Response to stimulus.Stress response.Biotic stress response	AT1G70830
Vitvi01g01982	2688.03	2.06595	0.44677	4.6242	3.76e-06	2.94e-05	Bet v I allergen	Response to stimulus.Stress response.Biotic stress response	AT1G70830
Vitvi01g01983	733.432	1.05448	0.290489	3.63001	0.000283413	0.00135884	No hit	No hit
Vitvi01g01993	360.526	-1.53852	0.196177	-7.84248	4.42e-15	1.65e-13	Unknown protein	Unknown
Vitvi01g02001	4149.15	-1.67806	0.520221	-3.22566	0.00125681	0.00495952	S-adenosyl-L-methionine:carboxyl methyltransferase	Unclear	AT1G68040
Vitvi01g02006	285.519	5.67838	0.445707	12.7402	3.54e-37	1.31e-34	Unknown	Unknown
Vitvi01g02009	219.995	-1.61408	0.327301	-4.93147	8.16e-07	7.49e-06	Deoxymugineic acid synthase	Metabolism.Primary metabolism.Amino acid metabolism.Methionine metabolism	AT1G59950
Vitvi01g02012	13814.2	-2.08363	0.381443	-5.4625	4.69e-08	5.57e-07	Protease inhibitor/seed storage/lipid transfer protein (LTP)	Transport overview.Macromolecule transport.Lipid transport
Vitvi01g02013	489.529	2.23486	0.425462	5.25279	1.5e-07	1.61e-06	Glutamate decarboxylase	Metabolism.Primary metabolism.Amino acid metabolism.Glutamate metabolism.Glutamate catabolism	AT2G02010
Vitvi01g02017	38.6816	1.63238	0.387458	4.21303	2.52e-05	0.000160073	No hit	No hit
Vitvi01g02030	1689	-1.70399	0.23179	-7.35143	1.96e-13	5.75e-12	Unknown protein	Unknown	AT1G24580
Vitvi01g02031	21166.7	-2.85918	0.45839	-6.23745	4.45e-10	7.73e-09	No hit	No hit
Vitvi01g02056	27136.5	-1.04027	0.105513	-9.85912	6.26e-23	5.73e-21	Iron sulfur cluster assembly protein 1	Unclear	AT4G22220
Vitvi01g02057	4698.87	1.74443	0.251326	6.94092	3.9e-12	9.4e-11	No hit	No hit
Vitvi01g02058	11227.8	1.42648	0.231391	6.16481	7.06e-10	1.19e-08	Protein disulfide isomerase	Metabolism.Primary metabolism.Protein metabolism and modification.Protein folding.Disulfide bond rearrangement	AT1G60420
Vitvi01g02060	535.356	-1.09965	0.22534	-4.87994	1.06e-06	9.48e-06	Subtilisin-like serine protease 2	Metabolism.Primary metabolism.Protein metabolism and modification.Proteolysis.Peptidase-mediated proteolysis.Subtilase-mediated proteolysis	AT4G34980
Vitvi01g02061	279.866	1.0274	0.387106	2.65405	0.00795321	0.024195	Protein disulfide isomerase	Metabolism.Primary metabolism.Protein metabolism and modification.Protein folding.Disulfide bond rearrangement	AT1G60420
Vitvi01g02062	531.394	4.35009	0.494333	8.79991	1.37e-18	7.81e-17	Unknown	Unknown
Vitvi01g02081	23.7249	-1.90053	0.750915	-2.53095	0.0113753	0.0326	No hit	No hit
Vitvi01g02093	3576.75	1.16267	0.295192	3.9387	8.19e-05	0.000456923	ARL1 (ARG1-like 1)	Transport overview.Primary Active Transporters.P-P-bond hydrolysis-driven transporters.General Secretory Pathway (Sec)	AT1G24120
Vitvi01g02096	405.748	-1.48586	0.460459	-3.22691	0.00125134	0.00494109	Unknown	Unknown	AT3G48180
Vitvi01g02097	51.1478	4.56158	0.849201	5.37162	7.8e-08	8.87e-07	Cupin family protein	Unknown	AT1G10460
Vitvi01g02100	875.33	-4.02367	0.420105	-9.57779	9.91e-22	8e-20	Unknown	Unknown
Vitvi01g02127	1939.01	-1.219	0.293019	-4.16014	3.18e-05	0.000197306	Unknown protein	Unknown	AT1G26920
Vitvi01g02131	56.645	2.49414	0.910084	2.74056	0.00613348	0.0194252	Glutathione S-transferase 10 GSTU10	Metabolism.Primary metabolism.Coenzyme and prosthetic group metabolism.Peptide derived compounds biosynthesis.Glutathione metabolism	AT1G74590
Vitvi01g02132	463.425	3.10865	0.693294	4.48389	7.33e-06	5.36e-05	Glutathione S-transferase 10 GSTU10	Metabolism.Primary metabolism.Coenzyme and prosthetic group metabolism.Peptide derived compounds biosynthesis.Glutathione metabolism	AT1G74590
Vitvi01g02136	2575.7	-1.13689	0.126241	-9.0057	2.14e-19	1.33e-17	Negatively light-regulated protein	Unknown	AT5G64130
Vitvi01g02195	183.607	-1.77185	0.367949	-4.81549	1.47e-06	1.26e-05	Gibberellin 2-oxidase 8 ATGA2OX8	Metabolism.Secondary metabolism.Terpenoid metabolism.Diterpenoid metabolism.Diterpenoid biosynthesis	AT4G21200
Vitvi01g02214	220.747	2.1798	0.536428	4.06355	4.83e-05	0.000285327	Anthranilate N-benzoyltransferase	Metabolism.Primary metabolism.Amino acid metabolism.Aromatic amino acid metabolism.Aromatic amino acid biosynthesis
Vitvi01g02215	12.4992	-2.30948	0.667428	-3.46027	0.000539633	0.00238972	No hit	No hit
Vitvi01g02224	309.647	-1.42313	0.298061	-4.77463	1.8e-06	1.52e-05	Chaperone BCS1 mitochondrial	Metabolism.Primary metabolism.Protein metabolism and modification.Protein folding.Chaperone-mediated protein folding	AT3G50930
Vitvi01g02262	12.2714	-5.15495	1.60079	-3.22026	0.00128074	0.00504258	Nodulin MtN21 family	Transport overview.Electrochemical Potential-driven Transporters.Porters.Drug/Metabolite Transporter.Plant Drug/Metabolite Exporter	AT3G30340
Vitvi01g02275	123.642	3.00041	0.702186	4.27296	1.93e-05	0.000126514	Unknown protein	Unknown	AT3G48660
Vitvi01g02287	3.56744	5.09092	2.16852	2.34765	0.0188925	0.0496905	Glutaredoxin-like	Response to stimulus.Stress response.Abiotic stress response.Oxidative stress response	AT5G14070
Vitvi01g02300	49.351	2.61061	0.554226	4.71037	2.47e-06	2.02e-05	C2 domain-containing protein	Signaling.Signaling pathway.Protein kinase
Vitvi01g02312	23.8543	-1.2155	0.409482	-2.96838	0.00299376	0.0104756	Photosystem II PsbF protein	Metabolism.Primary metabolism.Generation of metabolite precursors and energy.Photosynthesis.Photosystem II
Vitvi01g02318	78.9879	-1.94848	0.515734	-3.77808	0.000158041	0.000812874	NADH dehydrogenase subunit 7	Metabolism.Primary metabolism.Generation of metabolite precursors and energy.Electron transport.Respiratory-chain phosphorylation	ATMG00510
Vitvi02g00015	42.5714	2.83535	0.958954	2.95671	0.00310941	0.0108278	Bisphosphoglycerate mutase	Metabolism.Primary metabolism.Carbohydrate metabolism.Glycolysis Gluconeogenesis	AT3G05170
Vitvi02g00021	7033.25	-1.09104	0.38569	-2.82881	0.00467209	0.0153766	SP1L5 (SPIRAL1-like5)	Cellular process.Cellular component organization and biogenesis.Cytoskeleton organization and biogenesis	AT4G23496
Vitvi02g00022	2316.05	2.92243	0.747988	3.90706	9.34e-05	0.000513597	Polygalacturonase GH28	Cellular process.Cellular component organization and biogenesis.Cell wall organization and biogenesis.Cell wall metabolism.Cell wall modification.Pectin modification	AT4G23500
Vitvi02g00025	2150.26	1.26119	0.289862	4.351	1.36e-05	9.26e-05	Heat shock protein 90-1	Metabolism.Primary metabolism.Protein metabolism and modification.Protein folding.Chaperone-mediated protein folding.HSP-mediated protein folding	AT5G52640
Vitvi02g00028	29.8427	5.14585	1.02916	5.00002	5.73e-07	5.45e-06	MYB Domain protein 103	Regulation overview.Regulation of gene expression.Regulation of transcription.Transcription factor.MYB family transcription factor	AT1G63910
Vitvi02g00029	128.715	1.21402	0.379476	3.19921	0.00137804	0.00538218	Unknown protein	Unknown	AT1G63930
Vitvi02g00031	180.827	1.75369	0.713632	2.45741	0.0139943	0.0387128	Heavy-metal-associated domain-containing protein	Unclear
Vitvi02g00038	10.547	3.35782	1.39905	2.40007	0.016392	0.0441855	DNA topoisomerase VIA	Cellular process.Cell growth and death	AT1G63990
Vitvi02g00039	207.95	1.41745	0.52692	2.69006	0.0071439	0.0221139	WRKY DNA-binding protein 27	Regulation overview.Regulation of gene expression.Regulation of transcription.Transcription factor.WRKY family transcription factor	AT5G52830
Vitvi02g00046	473.391	-3.10771	0.587406	-5.29056	1.22e-07	1.34e-06	Unknown protein	Unknown	AT5G41590
Vitvi02g00051	458.36	1.80854	0.30361	5.9568	2.57e-09	3.93e-08	Unknown protein	Unknown	AT1G64080
Vitvi02g00060	1822.39	-2.36547	0.432013	-5.47545	4.36e-08	5.2e-07	AAA-type ATPase	Diverse functions.Gene family with diverse functions.AAA-type ATPase domain family	AT1G64110
Vitvi02g00066	118.583	-1.55958	0.591017	-2.63881	0.00831986	0.0250895	Aluminum-activated malate transporter 9	Transport overview.Electrochemical Potential-driven Transporters.Porters.Aromatic Acid Exporter	AT3G18440
Vitvi02g00070	60.8481	4.10967	0.743261	5.52924	3.22e-08	3.96e-07	Pinoresinol forming dirigent protein	Metabolism.Secondary metabolism.Phenylpropanoid metabolism.Phenylpropanoid biosynthesis	AT4G23690
Vitvi02g00083	229.305	2.36991	0.592824	3.99767	6.4e-05	0.000365503	No hit	No hit
Vitvi02g00085	343.366	1.96356	0.604716	3.24708	0.00116594	0.00464427	ABC transporter C member 15	Transport overview.Macromolecule transport.Multidrug transport.Multidrug ABC transport	AT3G59140
Vitvi02g00087	5001.1	1.21997	0.268634	4.5414	5.59e-06	4.18e-05	V-type H+-transporting ATPase subunit E	Metabolism.Primary metabolism.Generation of metabolite precursors and energy.Electron transport.Respiratory-chain phosphorylation	AT4G11150
Vitvi02g00090	82.7183	-1.72235	0.35955	-4.79031	1.67e-06	1.42e-05	Aldose 1-epimerase	Metabolism.Primary metabolism.Carbohydrate metabolism.Glycolysis Gluconeogenesis	AT4G23730
Vitvi02g00093	160.781	-1.53517	0.220763	-6.95393	3.55e-12	8.62e-11	Ethylene-responsive transcription factor cytokinin response factor 2	Signaling.Hormone Signaling.Cytokinin Signaling.Cytokinin-mediated Signaling pathway	AT4G23750
Vitvi02g00108	473.168	4.00094	0.219433	18.233	2.82e-74	2.31e-70	High mobility group HMG1/2	Regulation overview.Regulation of gene expression.Regulation of transcription.Transcription factor.HMG family transcription factor	AT4G11080
Vitvi02g00110	1135.18	3.76605	0.499956	7.53277	4.97e-14	1.61e-12	UDP-glucuronosyl/UDP-glucosyltransferase	Metabolism.Primary metabolism.Carbohydrate metabolism.Monosaccharide metabolism.Pentose glucuronate interconversion	AT4G01070
Vitvi02g00116	507.625	1.60376	0.37562	4.26964	1.96e-05	0.000128236	Unknown protein	Unknown
Vitvi02g00117	25224.1	1.06173	0.271625	3.90882	9.27e-05	0.000510212	No hit	No hit
Vitvi02g00118	1982.68	1.91803	0.252081	7.60876	2.77e-14	9.23e-13	Polygalacturonase GH28	Cellular process.Cellular component organization and biogenesis.Cell wall organization and biogenesis.Cell wall metabolism.Cell wall modification.Pectin modification	AT4G23820
Vitvi02g00120	137.178	3.49122	0.518316	6.73569	1.63e-11	3.54e-10	Primase polypeptide 1	Metabolism.Primary metabolism.Nucleobase, nucleoside, nucleotide, nucleic acid metabolism.Nucleic acid metabolism.DNA metabolism.DNA replication	AT5G41880
Vitvi02g00125	5713.57	3.83993	0.282372	13.5988	4.07e-42	2.32e-39	Endo-1,4-beta-glucanase	Cellular process.Cellular component organization and biogenesis.Cell wall organization and biogenesis.Cell wall metabolism.Cell wall catabolism.Cellulose catabolism	AT1G64390
Vitvi02g00126	101.753	-3.47396	0.445169	-7.8037	6.01e-15	2.2e-13	Protein phosphatase 2C DBP	Regulation overview.Regulation of gene expression.Regulation of transcription.Transcription factor.DBP family transcription factor	AT5G59220
Vitvi02g00130	911.68	1.47101	0.479173	3.06989	0.00214136	0.00786427	Zinc finger (C3HC4-type ring finger) family protein ATL1E	Regulation overview.Regulation of gene expression.Regulation of transcription.Transcription factor.Zinc finger C3HC4 family transcription factor	AT2G25410
Vitvi02g00146	611.064	1.82778	0.283663	6.44349	1.17e-10	2.21e-09	Triacylglycerol lipase	Metabolism.Primary metabolism.Lipid metabolism.Glycerolipid metabolism.Glycerolipid catabolism	AT4G10955
Vitvi02g00147	443.052	3.10126	0.439161	7.06178	1.64e-12	4.24e-11	Harpin-induced 1	Response to stimulus.Stress response.Biotic stress response.Virus stress response	AT4G23930
Vitvi02g00149	878.751	1.07725	0.25634	4.20243	2.64e-05	0.000166984	Phosphatidylinositol 4-kinase type-II	Metabolism.Primary metabolism.Carbohydrate metabolism.Monosaccharide metabolism.Inositol phosphate metabolism	AT2G46500
Vitvi02g00151	23.3508	-1.13054	0.409964	-2.75765	0.00582187	0.0185774	Lipase GDSL	Unclear	AT4G10950
Vitvi02g00152	101.795	-3.86783	0.632806	-6.11218	9.83e-10	1.61e-08	SOS3 (salt overly sensitive 3)	Signaling.Hormone Signaling.ABA Signaling.ABA-mediated Signaling pathway	AT5G24270
Vitvi02g00160	513.584	2.70354	0.661559	4.08662	4.38e-05	0.000262052	Unknown	Unknown
Vitvi02g00165	714.631	1.88531	0.287074	6.56735	5.12e-11	1.04e-09	Cellulose synthase CSLG3	Cellular process.Cellular component organization and biogenesis.Cell wall organization and biogenesis.Cell wall metabolism.Cell wall biosynthesis.Cellulose biosynthesis	AT4G23990
Vitvi02g00211	250.141	2.59732	0.311781	8.33057	8.05e-17	3.74e-15	Plastocyanin domain-containing protein	Metabolism.Primary metabolism.Generation of metabolite precursors and energy.Photosynthesis.Photosynthetic-chain phosphorylation	AT1G64640
Vitvi02g00216	563.115	1.00813	0.31711	3.17911	0.00147729	0.0057128	Unknown protein	Unknown	AT1G62870
Vitvi02g00220	262.217	3.81305	0.543212	7.01945	2.23e-12	5.63e-11	Metal-nicotianamine transporter YSL1	Transport overview.Electrochemical Potential-driven Transporters.Porters.Oligopeptide Transporter	AT4G24120
Vitvi02g00226	4980.43	-2.69273	0.425248	-6.33213	2.42e-10	4.37e-09	CYP78A8	Metabolism.Cellular metabolism.Oxidation reduction.Cytochrome P450 oxidoreductase	AT3G61880
Vitvi02g00231	91.9162	2.29944	0.606491	3.79138	0.000149813	0.000776198	Basic helix-loop-helix (bHLH) family	Regulation overview.Regulation of gene expression.Regulation of transcription.Transcription factor.bHLH family transcription factor	AT4G00870
Vitvi02g00235	125.221	3.82689	1.62807	2.35057	0.0187446	0.0493862	Unknown protein	Unknown	AT1G64680
Vitvi02g00236	1530.73	3.55429	0.610887	5.81824	5.95e-09	8.49e-08	Cellulase CEL2	Cellular process.Cellular component organization and biogenesis.Cell wall organization and biogenesis.Cell wall metabolism.Cell wall catabolism.Cellulose catabolism	AT1G02800
Vitvi02g00239	15.8373	-4.03666	0.95216	-4.23948	2.24e-05	0.000144465	Growth-regulating factor 5	Regulation overview.Regulation of gene expression.Regulation of transcription.Transcription factor.GRF family transcription factor
Vitvi02g00242	339.805	1.61633	0.359294	4.49863	6.84e-06	5.04e-05	NAC Secondary wall thickening promoting factor1	Regulation overview.Regulation of gene expression.Regulation of transcription.Transcription factor.NAC family transcription factor	AT2G46770
Vitvi02g00243	330.389	3.3004	0.262178	12.5884	2.45e-36	8.22e-34	Unknown protein	Unknown	AT1G64700
Vitvi02g00248	2321.75	1.68448	0.285038	5.90965	3.43e-09	5.11e-08	Glucan endo-1,3-beta-glucosidase 7 precursor	Metabolism.Primary metabolism.Carbohydrate metabolism.Polysaccharide metabolism.Starch and sucrose metabolism	AT1G32860
Vitvi02g00257	106.447	2.87967	0.547501	5.25967	1.44e-07	1.56e-06	Ankyrin 3, epithelial isoform a	Transport overview.Accessory factors involved in transport.Auxiliary transport proteins.Ankyrin	AT5G14230
Vitvi02g00264	133.764	-5.12862	0.917706	-5.58852	2.29e-08	2.92e-07	Caffeic acid O-3-methyltransferase	Metabolism.Secondary metabolism.Phenylpropanoid metabolism.Phenylpropanoid biosynthesis	AT5G54160
Vitvi02g00265	38.878	-3.95606	0.791324	-4.9993	5.75e-07	5.46e-06	Caffeic acid O-3-methyltransferase	Metabolism.Secondary metabolism.Phenylpropanoid metabolism.Phenylpropanoid biosynthesis	AT5G54160
Vitvi02g00270	5306.42	1.66787	0.473895	3.5195	0.000432361	0.00196833	Naringenin,2-oxoglutarate 3-dioxygenase	Metabolism.Secondary metabolism.Phenylpropanoid metabolism.Flavonoid metabolism.Flavonoid biosynthesis	AT4G10490
Vitvi02g00271	511.244	2.78019	0.468559	5.93348	2.97e-09	4.47e-08	flavanone 3-beta-hydroxylase	Metabolism.Secondary metabolism.Phenylpropanoid metabolism.Flavonoid metabolism.Flavonoid biosynthesis	AT4G10490
Vitvi02g00275	47.8402	1.69965	0.586365	2.89863	0.00374803	0.0127476	NGA1 (NGATHA1)	Regulation overview.Regulation of gene expression.Regulation of transcription.Transcription factor.ABI3 family transcription factor	AT2G46870
Vitvi02g00276	2933.32	-1.13313	0.296513	-3.82152	0.00013263	0.00069738	Copper chaperone (CCH)	Metabolism.Primary metabolism.Protein metabolism and modification.Protein folding.Chaperone-mediated protein folding	AT2G18196
Vitvi02g00280	66.6145	-1.29404	0.457387	-2.82921	0.00466628	0.0153616	Zinc finger (C3HC4-type ring finger)	Regulation overview.Regulation of gene expression.Regulation of transcription.Transcription factor.Zinc finger C3HC4 family transcription factor	AT5G47610
Vitvi02g00286	43.8523	1.50743	0.621721	2.42461	0.0153249	0.0417625	Ethylene-responsive transcription factor related to APETALA2 11	Signaling.Hormone Signaling.Ethylene Signaling.Ethylene-mediated Signaling pathway
Vitvi02g00287	179.632	-2.34916	0.28847	-8.14351	3.84e-16	1.64e-14	Nodulin MtN21 family	Transport overview.Electrochemical Potential-driven Transporters.Porters.Drug/Metabolite Transporter.Plant Drug/Metabolite Exporter	AT3G30340
Vitvi02g00288	2426.79	3.63846	0.373442	9.74304	1.98e-22	1.71e-20	2-oxoglutarate-dependent dioxygenase	Metabolism.Cellular metabolism.Oxidation reduction	AT1G63310
Vitvi02g00289	102.438	5.02356	0.717282	7.0036	2.49e-12	6.28e-11	Dehydration-responsive protein	Response to stimulus.Stress response.Abiotic stress response.Drought stress response	AT1G33170
Vitvi02g00295	1025.85	2.45795	0.240937	10.2016	1.95e-24	2.18e-22	Aquaporin NIP5;1	Transport overview.Channels and pores.a-Type channels.Major Intrinsic Protein
Vitvi02g00301	233.057	2.34303	0.726921	3.22323	0.00126756	0.00499593	Arsenite transport protein (ArsB)	Transport overview.Electrochemical Potential-driven Transporters.Porters.Arsenite-Antimonite Efflux	AT1G02260
Vitvi02g00327	689.059	1.24796	0.493822	2.52715	0.0114994	0.0328898	Tubulin beta-6 chain	Cellular process.Cellular component organization and biogenesis.Cytoskeleton organization and biogenesis.Microtubule organization and biogenesis	AT5G12250
Vitvi02g00340	1325.77	3.33457	0.316278	10.5432	5.46e-26	7.05e-24	Tubulin beta-8 chain	Cellular process.Cellular component organization and biogenesis.Cytoskeleton organization and biogenesis.Microtubule organization and biogenesis	AT5G23860
Vitvi02g00348	151.618	2.48995	0.543138	4.58437	4.55e-06	3.48e-05	Remorin	Unclear	AT5G23750
Vitvi02g00370	66.6838	9.31684	0.915908	10.1722	2.64e-24	2.86e-22	Scarecrow transcription factor 29 (SCL29)	Regulation overview.Regulation of gene expression.Regulation of transcription.Transcription factor.GRAS family transcription factor	AT1G63100
Vitvi02g00374	2084.85	-2.20458	0.316747	-6.96004	3.4e-12	8.27e-11	Rab/Ypt GTPase Ara4-interacting protein	Signaling.Signaling pathway.G-protein signaling pathway.RAB-GTPase regulation	AT4G11740
Vitvi02g00382	2308.84	-1.35889	0.39159	-3.47018	0.000520105	0.00231494	Rhomboid ATRBL2	Unclear	AT5G07250
Vitvi02g00390	711.513	1.45585	0.357948	4.06721	4.76e-05	0.000281557	UDP-glucose 4-epimerase	Metabolism.Primary metabolism.Carbohydrate metabolism.Monosaccharide metabolism.Galactose metabolism	AT1G12780
Vitvi02g00391	2035.61	2.60657	0.548636	4.751	2.02e-06	1.69e-05	Thaumatin [Vitis vinifera]	Response to stimulus.Stress response	AT4G11650
Vitvi02g00393	9123.9	-2.47452	0.799284	-3.09593	0.00196199	0.0073006	Osmotin	Response to stimulus.Stress response.Abiotic stress response.Osmotic stress response	AT4G11650
Vitvi02g00395	423.687	-1.11986	0.468569	-2.38997	0.0168499	0.0452597	S-N-methylcoclaurine 3'-hydroxylase	Metabolism.Secondary metabolism.Primary amino acids derivated metabolism.Alkaloid metabolism.Alkaloid biosynthesis	AT1G33720
Vitvi02g00404	189.05	-1.00466	0.22582	-4.44895	8.63e-06	6.2e-05	Sugar transporter 1	Transport overview.Electrochemical Potential-driven Transporters.Porters.Major Facilitator Superfamily.Sugar Porter
Vitvi02g00421	1292.43	-1.01234	0.210716	-4.80428	1.55e-06	1.33e-05	TCP family transcription factor TCP9	Regulation overview.Regulation of gene expression.Regulation of transcription.Transcription factor.TCP family transcription factor	AT5G51910
Vitvi02g00432	10.9447	4.50052	1.46161	3.07914	0.00207596	0.00766655	Unknown protein	Unknown	AT4G22900
Vitvi02g00435	9526.23	2.53391	0.25358	9.99252	1.64e-23	1.59e-21	Leucoanthocyanidin dioxgenase	Metabolism.Secondary metabolism.Phenylpropanoid metabolism.Flavonoid metabolism.Flavonoid biosynthesis.Anthocyanin biosynthesis	AT4G22880
Vitvi02g00446	1855.9	1.16153	0.379293	3.06235	0.00219604	0.00803738	CYP76B1	Metabolism.Cellular metabolism.Oxidation reduction.Cytochrome P450 oxidoreductase	AT3G61040
Vitvi02g00450	1461.25	1.25276	0.26288	4.76554	1.88e-06	1.58e-05	Phosphate translocator protein2, Plastidic	Transport overview.Electrochemical Potential-driven Transporters.Porters.Drug/Metabolite Transporter.Triose-phosphate Transporter	AT1G12500
Vitvi02g00460	54.9091	1.36358	0.503611	2.70761	0.00677695	0.0211491	Unknown protein	Unknown	AT2G45450
Vitvi02g00465	11.495	3.35188	1.02965	3.25536	0.0011325	0.00453019	AT-hook DNA-binding protein	Unknown	AT4G22810
Vitvi02g00472	36.7829	1.39172	0.556461	2.50102	0.0123837	0.0349793	Unknown protein	Unknown	AT2G27830
Vitvi02g00481	368.722	-1.24397	0.479915	-2.59206	0.00954028	0.0281199	Unknown protein	Unknown	AT2G45360
Vitvi02g00499	593.808	3.62788	0.356733	10.1697	2.71e-24	2.91e-22	Invertase/pectin methylesterase inhibitor	Cellular process.Cellular component organization and biogenesis.Cell wall organization and biogenesis	AT4G12390
Vitvi02g00500	541.988	1.73016	0.59487	2.90847	0.00363203	0.012396	Invertase/pectin methylesterase inhibitor	Cellular process.Cellular component organization and biogenesis.Cell wall organization and biogenesis
Vitvi02g00502	1305.31	1.42169	0.319656	4.44755	8.69e-06	6.23e-05	Elongation factor G, chloroplast precursor	Metabolism.Primary metabolism.Protein metabolism and modification.Protein synthesis.Translation.Translational elongation	AT1G62750
Vitvi02g00511	2239.2	2.90958	0.452369	6.43188	1.26e-10	2.37e-09	Multi-copper oxidase (SKU5)	Transport overview.Incompletely characterized transport systems.Recognized transporters of unknown biochemical mechanism.Iron/Lead Transporter.Oxidase-dep Fe2+ Transporter	AT4G12420
Vitvi02g00512	1927.22	1.02959	0.372047	2.76736	0.00565117	0.0181105	Vacuolar invertase 2, GIN2	Metabolism.Primary metabolism.Carbohydrate metabolism.Monosaccharide metabolism.Galactose metabolism	AT1G12240
Vitvi02g00519	260.447	1.69902	0.675506	2.51518	0.0118973	0.0338431	flavin-containing monooxygenase family protein / FMO family protein	Metabolism.single reactions	AT1G62600
Vitvi02g00529	2545.29	2.9856	0.286086	10.4361	1.7e-25	2.06e-23	Nitrate transporter	Transport overview.Electrochemical Potential-driven Transporters.Porters.Proton-dependent Oligopeptide Transporter	AT1G12110
Vitvi02g00531	602.389	7.9133	1.04269	7.5893	3.22e-14	1.06e-12	Protease inhibitor/seed storage/lipid transfer protein (LTP)	Transport overview.Macromolecule transport.Lipid transport	AT1G62500
Vitvi02g00532	100699	2.75292	0.519391	5.30029	1.16e-07	1.28e-06	Protease inhibitor/seed storage/lipid transfer protein (LTP)	Transport overview.Macromolecule transport.Lipid transport	AT2G45180
Vitvi02g00533	1572.39	1.09993	0.185043	5.94418	2.78e-09	4.21e-08	No hit	No hit
Vitvi02g00545	176.504	1.81253	0.295956	6.12433	9.11e-10	1.51e-08	VAP27-1 (VAMP/synaptobrevin-associated protein 27-1)	Transport overview.Incompletely characterized transport systems.Putative transport protein.VAMP-associated protein	AT3G60600
Vitvi02g00546	173.513	1.08866	0.342926	3.17463	0.00150027	0.00578799	SEC14 cytosolic factor	Transport overview.Electrochemical Potential-driven Transporters.Porters.Drug/Metabolite Transporter.Triose-phosphate Transporter	AT5G47510
Vitvi02g00553	199.597	3.61024	0.371963	9.70593	2.84e-22	2.42e-20	Pectinesterase family	Cellular process.Cellular component organization and biogenesis.Cell wall organization and biogenesis.Cell wall metabolism.Cell wall modification.Pectin modification	AT5G47500
Vitvi02g00554	3853.26	-1.125	0.181992	-6.18161	6.35e-10	1.08e-08	Pex19 protein	Cellular process.Cellular component organization and biogenesis.Organelle organization and biogenesis.Peroxisome organization and biogenesis	AT5G17550
Vitvi02g00578	46.6589	2.57909	0.942631	2.73606	0.00621805	0.0196626	Unknown	Unknown
Vitvi02g00603	586.487	1.76075	0.228148	7.71758	1.19e-14	4.17e-13	Novel plant snare 11	Cellular process.Cellular transport.Protein trafficking.Vesicle-mediated trafficking	AT2G35190
Vitvi02g00614	5314.34	-1.50934	0.185521	-8.13566	4.1e-16	1.74e-14	Senescence-associated protein	Unknown	AT4G17670
Vitvi02g00620	129.728	1.3909	0.543363	2.5598	0.0104734	0.0303449	1-aminocyclopropane-1-carboxylate oxidase	Metabolism.Primary metabolism.Organic acid metabolism.Propanoate metabolism	AT4G25310
Vitvi02g00633	417.651	2.04705	0.37476	5.46228	4.7e-08	5.57e-07	Ribose-phosphate pyrophosphokinase 1	Metabolism.Primary metabolism.Carbohydrate metabolism.Monosaccharide metabolism.Monosaccharide catabolism.Pentose-phosphate shunt	AT1G32380
Vitvi02g00648	217.506	2.54111	0.565284	4.49528	6.95e-06	5.11e-05	Purine permease 10 PUP10	Transport overview.Electrochemical Potential-driven Transporters.Porters.Drug/Metabolite Transporter.Plant Organocation Permease
Vitvi02g00653	142.276	-2.85382	0.666537	-4.28155	1.86e-05	0.000122162	Expansin-like B1	Signaling.Hormone Signaling.Auxin Signaling.Auxin-mediated Signaling pathway	AT4G17030
Vitvi02g00659	804.424	-1.33181	0.283879	-4.69147	2.71e-06	2.2e-05	Unknown protein	Unknown	AT2G35290
Vitvi02g00672	104.827	2.73296	1.06563	2.56464	0.0103282	0.0300131	No hit	No hit
Vitvi02g00673	1055.64	4.17585	0.268002	15.5814	9.74e-55	1.41e-51	NAC domain-containing protein 71	Regulation overview.Regulation of gene expression.Regulation of transcription.Transcription factor.NAC family transcription factor	AT4G17980
Vitvi02g00683	326.656	2.75407	0.632009	4.35764	1.31e-05	9.01e-05	Proton-dependent oligopeptide transport (POT) family protein	Transport overview.Electrochemical Potential-driven Transporters.Porters.Proton-dependent Oligopeptide Transporter	AT1G32450
Vitvi02g00691	1487.14	-1.29378	0.173219	-7.46901	8.08e-14	2.54e-12	PHD finger transcription factor	Regulation overview.Regulation of gene expression.Regulation of transcription.Transcription factor.PHD family transcription factor	AT5G16680
Vitvi02g00693	741.68	1.2817	0.194415	6.59262	4.32e-11	8.82e-10	Carnitine/acylcarnitine carrier, Mitochondrial	Transport overview.Electrochemical Potential-driven Transporters.Porters.Mitochondrial Carrier.Mitochondrial carnitine/acyl carnitine carrier	AT5G46800
Vitvi02g00695	169.467	2.68336	0.388372	6.90926	4.87e-12	1.16e-10	Abscisic acid receptor PYL1 RCAR12	Signaling.Hormone Signaling.ABA Signaling.ABA-mediated Signaling pathway	AT5G46790
Vitvi02g00701	37.2232	2.73073	0.947497	2.88205	0.00395094	0.0133278	No hit	No hit
Vitvi02g00705	2579.91	3.06082	0.261771	11.6927	1.39e-31	3.21e-29	TRN2 (TORNADO 2)	Development.Meristem organization and activity	AT5G46700
Vitvi02g00709	552.041	1.41392	0.413963	3.41558	0.000636475	0.00275978	Basic helix-loop-helix BHLH071	Regulation overview.Regulation of gene expression.Regulation of transcription.Transcription factor.bHLH family transcription factor	AT5G46690
Vitvi02g00711	3.64183	-5.52535	2.16389	-2.55343	0.0106667	0.0308387	NADH dehydrogenase (ubiquinone) flavoprotein 2	Metabolism.Primary metabolism.Generation of metabolite precursors and energy.Electron transport.Respiratory-chain phosphorylation
Vitvi02g00763	86.9127	-2.63485	0.600133	-4.39045	1.13e-05	7.88e-05	4-hydroxyphenylpyruvate dioxygenase	Metabolism.Primary metabolism.Amino acid metabolism.Aromatic amino acid metabolism.Tyrosine metabolism.Tyrosine catabolism	AT1G06570
Vitvi02g00851	53.0801	3.82482	0.57465	6.65592	2.82e-11	5.95e-10	RPM1 (resistance to p. syringae pv maculicola 1)	Response to stimulus.Stress response.Biotic stress response.Plant-pathogen interaction	AT3G07040
Vitvi02g00867	63.6113	9.24722	1.16971	7.90555	2.67e-15	1.02e-13	Geraniol 10-hydroxylase	Metabolism.Secondary metabolism.Terpenoid metabolism.Monoterpenoid metabolism.Monoterpenoid biosynthesis	AT2G45550
Vitvi02g00915	3063.58	1.36278	0.49025	2.77977	0.00543976	0.017513	Phosphoribulokinase	Metabolism.Primary metabolism.Carbon fixation
Vitvi02g00936	753.463	1.75619	0.202577	8.66926	4.35e-18	2.31e-16	No hit	No hit
Vitvi02g00972	84.1513	-1.40803	0.37185	-3.78656	0.000152748	0.000788955	No hit	No hit
Vitvi02g01004	155.521	2.39835	0.443733	5.40494	6.48e-08	7.47e-07	Myb family	Regulation overview.Regulation of gene expression.Regulation of transcription.Transcription factor.G2-like family transcription factor	AT5G45580
Vitvi02g01047	151.657	2.49809	0.301118	8.29606	1.08e-16	4.93e-15	BRXL1 (Brevis radix like 1)	Response to stimulus.Stress response.Biotic stress response	AT1G31880
Vitvi02g01113	9.34473	6.48163	1.54558	4.19365	2.75e-05	0.000172959	Anthraniloyal-CoA: methanol anthraniloyal transferase	Metabolism.Primary metabolism.Amino acid metabolism.Aromatic amino acid metabolism.Aromatic amino acid biosynthesis	AT5G17540
Vitvi02g01118	156.023	3.75952	1.52628	2.46319	0.0137705	0.0381873	Anthraniloyal-CoA: methanol anthraniloyal transferase	Metabolism.Primary metabolism.Amino acid metabolism.Aromatic amino acid metabolism.Aromatic amino acid biosynthesis	AT5G17540
Vitvi02g01121	89.6812	3.87618	1.16437	3.329	0.000871592	0.00361197	Anthraniloyal-CoA: methanol anthraniloyal transferase	Metabolism.Primary metabolism.Amino acid metabolism.Aromatic amino acid metabolism.Aromatic amino acid biosynthesis	AT5G17540
Vitvi02g01126	33.1925	8.30954	1.43852	5.77645	7.63e-09	1.07e-07	Anthraniloyal-CoA: methanol anthraniloyal transferase	Metabolism.Primary metabolism.Amino acid metabolism.Aromatic amino acid metabolism.Aromatic amino acid biosynthesis	AT5G17540
Vitvi02g01143	5985.91	1.33479	0.325897	4.09575	4.21e-05	0.000253545	Dehydration-responsive protein	Response to stimulus.Stress response.Abiotic stress response.Drought stress response	AT1G31850
Vitvi02g01172	707.143	-1.42301	0.311643	-4.56616	4.97e-06	3.75e-05	No hit	No hit
Vitvi02g01179	2266.11	1.06146	0.259526	4.09	4.31e-05	0.000258839	Sodium:solute symporter family protein	Transport overview.Electrochemical Potential-driven Transporters.Porters.Solute:Sodium Symporter	AT5G45380
Vitvi02g01210	343.529	1.45165	0.18396	7.89111	3e-15	1.14e-13	Unknown protein	Unknown	AT1G31460
Vitvi02g01215	23.3492	3.91158	1.35445	2.88794	0.00387779	0.0131035	Glycosyl transferase family 1 protein	Metabolism.Primary metabolism.Carbohydrate metabolism	AT4G19460
Vitvi02g01222	293.713	-1.58374	0.509872	-3.10616	0.00189536	0.00709467	Glycosyl transferase family 1 protein	Metabolism.Primary metabolism.Carbohydrate metabolism	AT4G19460
Vitvi02g01227	168.187	3.54338	0.488745	7.24997	4.17e-13	1.18e-11	Anthranilate N-hydroxycinnamoyl/benzoyltransferase	Metabolism.Primary metabolism.Amino acid metabolism.Aromatic amino acid metabolism.Aromatic amino acid biosynthesis	AT1G31490
Vitvi02g01231	1050.06	1.17322	0.210716	5.56778	2.58e-08	3.24e-07	Zinc finger (C3HC4-type ring finger)	Regulation overview.Regulation of gene expression.Regulation of transcription.Transcription factor.Zinc finger C3HC4 family transcription factor	AT5G45290
Vitvi02g01241	15.7273	5.12643	1.33801	3.83138	0.000127428	0.000675091	10-deacetylbaccatin III 10-O-acetyltransferase	Metabolism.Secondary metabolism.Terpenoid metabolism.Diterpenoid metabolism.Diterpenoid biosynthesis.Taxol biosynthesis	AT5G17540
Vitvi02g01248	574.358	-2.71859	0.209074	-13.003	1.18e-38	4.58e-36	Unknown protein	Unknown	AT5G45310
Vitvi02g01253	705.535	-1.04069	0.1843	-5.64672	1.64e-08	2.15e-07	Pentatricopeptide (PPR) repeat-containing protein	Diverse functions.Gene family with diverse functions.Pentatricopeptide domain family	AT1G77360
Vitvi02g01261	2414.33	-1.4692	0.174778	-8.4061	4.24e-17	2.05e-15	Unknown protein	Unknown	AT4G19390
Vitvi02g01264	51.0893	2.79323	0.936262	2.98339	0.00285078	0.0100542	Alcohol oxidase	Metabolism.Cellular metabolism.Methane metabolism	AT4G19380
Vitvi02g01266	94.2666	1.37725	0.359706	3.82882	0.000128761	0.00068054	Unknown	Unknown
Vitvi02g01269	2265.06	-1.23392	0.490515	-2.51556	0.0118844	0.0338103	ABA 8'-hydroxylase CYP707A1	Metabolism.Secondary metabolism.Terpenoid metabolism.Tetraterpenoid metabolism.Tetraterpenoid biosynthesis.Carotenoid biosynthesis	AT4G19230
Vitvi02g01270	28.3101	3.28635	1.2869	2.55369	0.0106588	0.0308204	Receptor protein kinase	Signaling.Signaling pathway.Protein kinase	AT3G19300
Vitvi02g01286	506.426	2.14256	0.585883	3.65697	0.000255212	0.00123766	9-cis-epoxycarotenoid dioxygenase	Metabolism.Secondary metabolism.Terpenoid metabolism.Tetraterpenoid metabolism.Tetraterpenoid biosynthesis.Carotenoid biosynthesis	AT4G19170
Vitvi02g01288	282.084	2.97608	1.02694	2.89801	0.0037554	0.0127673	9-cis-epoxycarotenoid dioxygenase	Metabolism.Secondary metabolism.Terpenoid metabolism.Tetraterpenoid metabolism.Tetraterpenoid biosynthesis.Carotenoid biosynthesis	AT4G19170
Vitvi02g01299	210.227	2.25374	0.683612	3.29681	0.000977903	0.00399184	CRK10 (cysteine-rich RLK10)	Signaling.Signaling pathway.Protein kinase	AT4G05200
Vitvi02g01313	2096.61	-1.67108	0.351672	-4.7518	2.02e-06	1.68e-05	Unknown	Unknown
Vitvi02g01323	332.178	1.72128	0.699664	2.46016	0.0138877	0.0384525	Pinoresinol forming dirigent protein	Metabolism.Secondary metabolism.Phenylpropanoid metabolism.Phenylpropanoid biosynthesis	AT4G23690
Vitvi02g01333	71.7876	4.16192	1.01144	4.11486	3.87e-05	0.000235865	V-type H+-transporting ATPase subunit E	Metabolism.Primary metabolism.Generation of metabolite precursors and energy.Electron transport.Respiratory-chain phosphorylation	AT1G64200
Vitvi02g01341	344.958	2.00312	0.758148	2.64213	0.00823867	0.0248862	Cellulose synthase CSLG3	Cellular process.Cellular component organization and biogenesis.Cell wall organization and biogenesis.Cell wall metabolism.Cell wall biosynthesis.Cellulose biosynthesis	AT4G23990
Vitvi02g01343	55.3996	1.50533	0.549646	2.73873	0.00616761	0.0195207	Cellulose synthase CSLG3	Cellular process.Cellular component organization and biogenesis.Cell wall organization and biogenesis.Cell wall metabolism.Cell wall biosynthesis.Cellulose biosynthesis	AT4G23990
Vitvi02g01346	53.5451	2.0807	0.518832	4.01036	6.06e-05	0.000348511	Subtilisin-like protease	Metabolism.Primary metabolism.Protein metabolism and modification.Proteolysis.Peptidase-mediated proteolysis.Subtilase-mediated proteolysis
Vitvi02g01347	75.9517	1.3041	0.420926	3.09817	0.00194718	0.00725543	Cellulose synthase CSLG3	Cellular process.Cellular component organization and biogenesis.Cell wall organization and biogenesis.Cell wall metabolism.Cell wall biosynthesis.Cellulose biosynthesis	AT4G23990
Vitvi02g01348	1771.5	1.65938	0.357046	4.64751	3.36e-06	2.66e-05	Cellulose synthase CSLG3	Cellular process.Cellular component organization and biogenesis.Cell wall organization and biogenesis.Cell wall metabolism.Cell wall biosynthesis.Cellulose biosynthesis	AT4G23990
Vitvi02g01365	9774.17	3.10762	0.463499	6.7047	2.02e-11	4.32e-10	Metal-nicotianamine transporter YSL1	Transport overview.Electrochemical Potential-driven Transporters.Porters.Oligopeptide Transporter	AT4G24120
Vitvi02g01373	101.996	-2.29471	0.297805	-7.70544	1.3e-14	4.55e-13	Nodulin MtN21 family	Transport overview.Electrochemical Potential-driven Transporters.Porters.Drug/Metabolite Transporter.Plant Drug/Metabolite Exporter	AT1G43650
Vitvi02g01375	838.928	-1.42797	0.329119	-4.33877	1.43e-05	9.71e-05	Nodulin MtN21 family	Transport overview.Electrochemical Potential-driven Transporters.Porters.Drug/Metabolite Transporter.Plant Drug/Metabolite Exporter
Vitvi02g01383	60.9358	1.37833	0.441208	3.12399	0.00178414	0.00672452	Cu2+-exporting ATPase HMA5 (heavy metal ATPase 5)	Transport overview.Primary Active Transporters.P-P-bond hydrolysis-driven transporters.P-type ATPase (P-ATPase).Cu2+-exporting ATPase	AT1G63440
Vitvi02g01384	1205.33	-1.9381	0.184846	-10.485	1.01e-25	1.28e-23	DTA2 (downstream target of AGL15 2)	Unknown	AT5G23850
Vitvi02g01399	890.509	2.12093	0.400715	5.29286	1.2e-07	1.32e-06	Unknown	Unknown
Vitvi02g01403	14148.6	-2.71825	0.534874	-5.08204	3.73e-07	3.67e-06	Osmotin [Vitis vinifera]	Response to stimulus.Stress response.Abiotic stress response.Osmotic stress response	AT4G11650
Vitvi02g01407	361.495	1.59985	0.430215	3.71873	0.000200229	0.000998461	Thaumatin	Response to stimulus.Stress response	AT4G11650
Vitvi02g01409	45601.3	-1.51469	0.286765	-5.282	1.28e-07	1.39e-06	Osmotin	Response to stimulus.Stress response.Abiotic stress response.Osmotic stress response	AT4G11650
Vitvi02g01438	1812.77	6.83363	1.15849	5.89872	3.66e-09	5.42e-08	Arachidonic acid-induced DEA1	Unknown	AT1G12090
Vitvi02g01439	23.3341	7.80085	1.32729	5.87727	4.17e-09	6.11e-08	Extensin	Cellular process.Cellular component organization and biogenesis.Cell wall organization and biogenesis.Cell wall structural protein	AT4G12510
Vitvi02g01440	6688.52	7.18853	0.741914	9.68917	3.35e-22	2.83e-20	Small nuclear ribonucleoprotein Sm D3	Metabolism.Primary metabolism.Nucleobase, nucleoside, nucleotide, nucleic acid metabolism.Nucleic acid metabolism.RNA metabolism.RNA biosynthesis.mRNA biosynthesis	AT1G12090
Vitvi02g01449	37.2436	3.29862	0.796444	4.14168	3.45e-05	0.00021243	Unknown	Unknown
Vitvi02g01450	60.13	3.9506	1.02042	3.87156	0.000108141	0.000584401	Unknown	Unknown
Vitvi02g01455	85.6232	2.16125	0.684042	3.15952	0.00158027	0.00604905	Unknown	Unknown
Vitvi02g01457	2442.36	-1.9055	0.494728	-3.8516	0.000117347	0.000627667	Unknown	Unknown
Vitvi02g01466	1941.87	1.5242	0.27053	5.63411	1.76e-08	2.29e-07	Unknown	Unknown
Vitvi02g01473	441.519	-1.59163	0.220159	-7.22944	4.85e-13	1.34e-11	1-aminocyclopropane-1-carboxylate oxidase	Metabolism.Primary metabolism.Organic acid metabolism.Propanoate metabolism	AT1G17020
Vitvi02g01474	323.226	-1.29134	0.186765	-6.91424	4.7e-12	1.12e-10	Naringenin,2-oxoglutarate 3-dioxygenase	Metabolism.Secondary metabolism.Phenylpropanoid metabolism.Flavonoid metabolism.Flavonoid biosynthesis	AT1G17020
Vitvi02g01480	358.111	-2.48488	0.307492	-8.08112	6.42e-16	2.65e-14	Unknown	Unknown
Vitvi02g01481	5.41423	5.69219	1.27917	4.44991	8.59e-06	6.18e-05	Invertase/pectin methylesterase inhibitor	Cellular process.Cellular component organization and biogenesis.Cell wall organization and biogenesis	AT5G46940
Vitvi02g01485	5.07878	5.59855	2.16106	2.59065	0.00957961	0.0282155	PBP1 (pinoid-binding protein 1)	Signaling.Hormone Signaling.Auxin Signaling.Auxin transport
Vitvi02g01486	16.3843	7.28934	1.08742	6.70336	2.04e-11	4.36e-10	Calcium-binding EF-hand	Unknown	AT5G54490
Vitvi02g01488	4.5766	5.45256	1.77595	3.07022	0.00213899	0.00785674	No hit	No hit
Vitvi02g01493	9.07579	-3.25998	0.858263	-3.79835	0.000145664	0.000757313	Unknown	Unknown
Vitvi02g01507	324.678	6.15616	0.607351	10.1361	3.82e-24	4.02e-22	No hit	No hit
Vitvi02g01513	1550.77	1.32322	0.344859	3.83697	0.000124562	0.000661481	No hit	No hit
Vitvi02g01529	163.21	1.47244	0.38123	3.86234	0.000112305	0.000604019	Chlororespiratory reduction 4 (CRR4)	Unknown	AT1G31920
Vitvi02g01537	32.7884	6.02322	1.17495	5.12638	2.95e-07	2.98e-06	CYP76C4	Metabolism.Cellular metabolism.Oxidation reduction.Cytochrome P450 oxidoreductase	AT2G45550
Vitvi02g01586	169.339	-1.11086	0.272837	-4.07152	4.67e-05	0.000277406	No hit	No hit
Vitvi02g01602	18.8628	-2.89773	0.991801	-2.92168	0.00348145	0.0119452	Nitrilase	Metabolism.Cellular metabolism.Amino acid derivative metabolism.Cyanoamino acid metabolism	AT5G22300
Vitvi02g01607	57.2125	-3.85142	0.970981	-3.96653	7.29e-05	0.000410751	Nitrilase 4B	Metabolism.Cellular metabolism.Amino acid derivative metabolism.Cyanoamino acid metabolism	AT5G22300
Vitvi02g01609	151.873	-2.98827	0.89805	-3.32751	0.000876253	0.00362823	Nitrilase 4B	Metabolism.Cellular metabolism.Amino acid derivative metabolism.Cyanoamino acid metabolism	AT5G22300
Vitvi02g01613	809.005	-3.41239	0.874186	-3.90351	9.48e-05	0.000519788	Nitrilase 4B	Metabolism.Cellular metabolism.Amino acid derivative metabolism.Cyanoamino acid metabolism	AT5G22300
Vitvi02g01621	52.1975	-1.95476	0.749082	-2.60953	0.00906658	0.0269732	Nitrilase 4B	Metabolism.Cellular metabolism.Amino acid derivative metabolism.Cyanoamino acid metabolism	AT5G22300
Vitvi02g01630	2821.4	1.08122	0.259913	4.15993	3.18e-05	0.000197436	No hit	No hit
Vitvi02g01661	21.1625	2.94024	1.11921	2.62706	0.00861256	0.025864	No hit	No hit
Vitvi02g01681	62.3431	1.26928	0.405286	3.13181	0.00173729	0.0065732	Stress-induced-phosphoprotein 1	Metabolism.Primary metabolism.Protein metabolism and modification.Protein folding.Chaperone-mediated protein folding.HSP-mediated protein folding	AT1G62740
Vitvi02g01683	106.045	1.95566	0.443853	4.40611	1.05e-05	7.41e-05	flavin-containing monooxygenase 3	Metabolism.single reactions	AT1G62620
Vitvi02g01704	7.80215	5.72446	1.23047	4.65227	3.28e-06	2.6e-05	Unknown	Unknown
Vitvi02g01727	604.669	1.32172	0.313858	4.21119	2.54e-05	0.000161254	CYP72A54	Metabolism.Secondary metabolism.Terpenoid metabolism.Monoterpenoid metabolism.Monoterpenoid biosynthesis	AT3G14620
Vitvi02g01729	96.3683	9.84694	0.955337	10.3073	6.53e-25	7.67e-23	Protein TINY 2 DREB3	Signaling.Hormone Signaling.Ethylene Signaling.Ethylene-mediated Signaling pathway	AT3G60490
Vitvi02g01754	63.6878	1.87244	0.783534	2.38974	0.0168601	0.0452723	Cationic amino acid transporter 6	Transport overview.Electrochemical Potential-driven Transporters.Porters.Amino Acid-Polyamine-Organocation.Cationic Amino Acid Transporter	AT5G04770
Vitvi02g01773	6.12192	5.87446	1.38195	4.25086	2.13e-05	0.000138044	Unknown protein	Unknown	AT4G16810
Vitvi02g01778	58.1844	-3.47648	0.658039	-5.28309	1.27e-07	1.39e-06	Oleosin OLE-4	Cellular process.Cellular component organization and biogenesis.Oil body organization and biogenesis	AT4G25140
Vitvi02g01784	2217.6	-4.24535	1.41459	-3.00111	0.00269	0.00955959	EXPANSIN-like B1	Signaling.Hormone Signaling.Auxin Signaling.Auxin-mediated Signaling pathway	AT4G17030
Vitvi02g01788	1183.88	-4.17675	1.39949	-2.98448	0.00284059	0.0100241	EXPANSIN-like B1	Signaling.Hormone Signaling.Auxin Signaling.Auxin-mediated Signaling pathway	AT4G17030
Vitvi02g01804	79.2603	3.73938	0.777158	4.81161	1.5e-06	1.29e-05	Cell division control protein CDC7	Cellular process.Cell growth and death	AT4G16970
Vitvi02g01806	20.5632	-3.35012	0.929441	-3.60445	0.00031282	0.00148216	Glycerol-3-phosphate permease	Transport overview.Electrochemical Potential-driven Transporters.Porters.Major Facilitator Superfamily.Organic phosphate:Pi antiporter	AT4G17550
Vitvi02g01817	82.3531	-1.99536	0.519059	-3.84418	0.000120955	0.000644418	Triacylglycerol lipase	Metabolism.Primary metabolism.Lipid metabolism.Glycerolipid metabolism.Glycerolipid catabolism	AT4G16820
Vitvi02g01823	7696.55	-1.18165	0.452981	-2.60862	0.00909087	0.0270291	Myb domain protein 85	Regulation overview.Regulation of gene expression.Regulation of transcription.Transcription factor.MYB family transcription factor
Vitvi02g01833	797.55	1.05954	0.336603	3.14774	0.00164538	0.00626991	Amine oxidase	Metabolism.Primary metabolism.Amino acid metabolism.Arginine and proline metabolism.Urea cycle
Vitvi02g01845	113.844	1.53732	0.530741	2.89654	0.00377298	0.0128129	Beta-fructosidase (BFRUCT3)	Metabolism.Primary metabolism.Carbohydrate metabolism.Monosaccharide metabolism.Galactose metabolism
Vitvi02g01852	85.2727	1.06053	0.339097	3.12752	0.00176288	0.00665155	Stress-induced-phosphoprotein 1	Response to stimulus.Stress response.Abiotic stress response
Vitvi03g00009	2196.54	1.42562	0.299641	4.75775	1.96e-06	1.63e-05	Beta-D-galactosidase	Metabolism.Primary metabolism.Carbohydrate metabolism.Monosaccharide metabolism.Galactose metabolism	AT4G36360
Vitvi03g00016	2677.47	-1.35847	0.197491	-6.87864	6.04e-12	1.42e-10	Purple acid phosphatase 2 PAP2	Metabolism.Primary metabolism.Coenzyme and prosthetic group metabolism.Riboflavin metabolism	AT2G16430
Vitvi03g00017	2100.6	-1.03639	0.218494	-4.74331	2.1e-06	1.74e-05	Purple acid phosphatase 10 ATPAP10/PAP10	Metabolism.Primary metabolism.Coenzyme and prosthetic group metabolism.Riboflavin metabolism	AT2G16430
Vitvi03g00023	330.453	3.61789	0.411673	8.78827	1.52e-18	8.58e-17	Minichromosome maintenance protein 4	Metabolism.Primary metabolism.Nucleobase, nucleoside, nucleotide, nucleic acid metabolism.Nucleic acid metabolism.DNA metabolism.DNA replication	AT2G16440
Vitvi03g00028	560.818	2.00742	0.261455	7.67786	1.62e-14	5.58e-13	Kinesin protein (MKRP2)	Cellular process.Cellular component organization and biogenesis.Cytoskeleton organization and biogenesis.Microtubule organization and biogenesis.Microtubule-driven movement	AT4G39050
Vitvi03g00044	59.8658	2.73485	0.608222	4.49647	6.91e-06	5.09e-05	Endo-1,4-beta-glucanase	Cellular process.Cellular component organization and biogenesis.Cell wall organization and biogenesis.Cell wall metabolism.Cell wall catabolism.Cellulose catabolism	AT4G39010
Vitvi03g00047	675.173	-1.99611	0.232497	-8.58554	9.04e-18	4.65e-16	Unknown protein	Unknown	AT5G42900
Vitvi03g00048	3883.99	1.96383	0.588395	3.3376	0.000845067	0.0035193	fructose-bisphosphate aldolase, chloroplast precursor	Metabolism.Primary metabolism.Carbohydrate metabolism.Glycolysis Gluconeogenesis	AT2G21330
Vitvi03g00052	130.619	2.9536	0.516997	5.71298	1.11e-08	1.51e-07	GC1 (GIANT chloroplast 1)	Cellular process.Cell growth and death	AT2G21280
Vitvi03g00079	57.3149	-1.40521	0.3478	-4.04026	5.34e-05	0.000311815	ABA-responsive protein (HVA22)HVA22H	Signaling.Hormone Signaling.ABA Signaling.ABA-mediated Signaling pathway	AT5G42560
Vitvi03g00080	6981.6	-1.44018	0.321414	-4.48076	7.44e-06	5.43e-05	Calcium-binding EF hand	Unknown	AT4G38810
Vitvi03g00085	20106.9	-1.10151	0.122628	-8.98257	2.65e-19	1.63e-17	Adenosylhomocysteine nucleosidase.	Metabolism.Primary metabolism.Amino acid metabolism.Methionine metabolism	AT4G38800
Vitvi03g00105	6031.05	-1.00181	0.266228	-3.76298	0.000167901	0.000856225	No hit	No hit
Vitvi03g00110	1885.62	1.34605	0.249089	5.40388	6.52e-08	7.51e-07	Amidase	Metabolism.Primary metabolism.Amino acid metabolism.Arginine and proline metabolism.Urea cycle	AT4G34880
Vitvi03g00112	4.86062	5.53634	2.11047	2.62327	0.00870902	0.0260853	Amidase	Metabolism.Primary metabolism.Amino acid metabolism.Arginine and proline metabolism.Urea cycle	AT4G34880
Vitvi03g00113	4.64222	5.4707	2.11336	2.58863	0.00963587	0.0283403	Dirigent protein pDIR7	Response to stimulus.Stress response.Biotic stress response	AT2G21100
Vitvi03g00120	180.833	10.755	0.929258	11.5737	5.6e-31	1.2e-28	Armadillo/beta-catenin repeat	Unknown	AT4G34940
Vitvi03g00122	302.697	3.00618	0.500452	6.00692	1.89e-09	2.97e-08	Auxin transporter protein 2	Signaling.Hormone Signaling.Auxin Signaling.Auxin transport	AT2G21050
Vitvi03g00124	2343.93	3.79808	0.277821	13.671	1.51e-42	9.06e-40	Thaumatin	Response to stimulus.Stress response	AT4G38660
Vitvi03g00125	678.442	3.01728	0.242343	12.4504	1.39e-35	4.55e-33	Glycosyl hydrolase family 10 protein	Cellular process.Cellular component organization and biogenesis.Cell wall organization and biogenesis.Cell wall metabolism.Cell wall catabolism.Xylan catabolism	AT4G38650
Vitvi03g00129	725.313	2.01048	0.409941	4.90432	9.38e-07	8.49e-06	Cofilin	Cellular process.Cellular component organization and biogenesis.Cytoskeleton organization and biogenesis.Actin depolymerization	AT2G16700
Vitvi03g00130	6399.74	1.26324	0.186471	6.77445	1.25e-11	2.78e-10	Subtilisin-like serine protease 2	Transport overview.Channels and pores.√ü-Barrel porins.Autotransporter	AT4G34980
Vitvi03g00132	101.144	-1.49025	0.29077	-5.12518	2.97e-07	3e-06	Pentatricopeptide (PPR) repeat-containing protein	Diverse functions.Gene family with diverse functions.Pentatricopeptide domain family	AT4G13650
Vitvi03g00134	10182.6	-1.22147	0.305832	-3.99391	6.5e-05	0.000370913	Amino acid permease 3	Transport overview.Electrochemical Potential-driven Transporters.Porters.Amino Acid/Auxin Permease	AT1G77380
Vitvi03g00142	23.0876	4.75999	1.04902	4.53757	5.69e-06	4.25e-05	Mini-chromosome maintenance protein MCM10	Cellular process.Cell growth and death	AT2G20980
Vitvi03g00154	1550.03	1.28411	0.436841	2.93954	0.00328702	0.0113706	Glyoxylate reductase	Metabolism.Primary metabolism.Generation of metabolite precursors and energy.Glyoxylate and dicarboxylate metabolism	AT1G68010
Vitvi03g00155	21746.7	1.78674	0.18346	9.7391	2.05e-22	1.77e-20	Aquaporin PIP3	Transport overview.Channels and pores.a-Type channels.Major Intrinsic Protein	AT4G35100
Vitvi03g00175	218.578	4.95935	0.586412	8.45711	2.74e-17	1.35e-15	Cyclin B2;4	Cellular process.Cell growth and death	AT1G76310
Vitvi03g00183	45.1015	1.0304	0.36917	2.79113	0.00525239	0.0170034	F-box family protein	Metabolism.Primary metabolism.Protein metabolism and modification.Proteolysis.cytoplasmic and nuclear protein degradation.Ubiquitin-mediated proteolysis
Vitvi03g00185	838.369	1.18955	0.194548	6.11442	9.69e-10	1.6e-08	S-adenosyl-methionine-sterol-C-methyltransferase	Metabolism.Primary metabolism.Lipid metabolism.Steroid metabolism.Steroid biosynthesis	AT1G20330
Vitvi03g00191	255.928	1.49003	0.356572	4.17876	2.93e-05	0.000183594	Mechanosensitive ion channel	Transport overview.Channels and pores.a-Type channels.Small Conductance Mechanosensitive Ion Channel	AT1G78610
Vitvi03g00199	1730.47	-1.16389	0.312731	-3.72171	0.000197878	0.00098814	MATE efflux family protein	Transport overview.Electrochemical Potential-driven Transporters.Porters.Multidrug/Oligosaccharidyl-lipid/Polysaccharide Flippase.Multi Antimicrobial Extrusion	AT4G38380
Vitvi03g00203	710.782	1.10688	0.30446	3.63555	0.000277393	0.00133441	Vestitone reductase	Metabolism.Secondary metabolism.Phenylpropanoid metabolism.Flavonoid metabolism.Isoflavonoid metabolism.Isoflavonoid biosynthesis	AT4G35250
Vitvi03g00206	105094	-2.73023	0.30398	-8.98163	2.67e-19	1.64e-17	Endochitinase 1, basic	Metabolism.Primary metabolism.Carbohydrate metabolism.Monosaccharide metabolism.Amino sugar metabolism	AT3G12500
Vitvi03g00209	6724.59	-1.38864	0.511088	-2.71702	0.00658728	0.0206386	Beta-expansin (EXPL2)	Signaling.Hormone Signaling.Auxin Signaling.Auxin-mediated Signaling pathway	AT4G38400
Vitvi03g00215	73.658	3.44521	0.945802	3.64263	0.000269862	0.00130227	Unknown protein	Unknown	AT2G41990
Vitvi03g00217	1780.13	-1.60798	0.49317	-3.26049	0.00111219	0.00445692	Monocopper oxidase SKS5 (SKU5 Similar 5)	Transport overview.Incompletely characterized transport systems.Recognized transporters of unknown biochemical mechanism.Iron/Lead Transporter.Oxidase-dep Fe2+ Transporter	AT1G76160
Vitvi03g00227	262.513	4.67457	0.568539	8.22206	2e-16	8.87e-15	Armadillo/beta-catenin repeat protein / U-box domain-containing	Unknown	AT5G42340
Vitvi03g00234	43.835	-1.37533	0.46094	-2.98375	0.00284741	0.0100452	Pentatricopeptide (PPR) repeat-containing	Diverse functions.Gene family with diverse functions.Pentatricopeptide domain family	AT2G17210
Vitvi03g00246	516.339	1.02699	0.275589	3.72652	0.000194143	0.000970871	Glutamate receptor 2 GLUR2	Transport overview.Channels and pores.a-Type channels.Glutamate-gated Ion Channel of Neurotransmitter Receptors	AT4G35290
Vitvi03g00248	209.791	3.19783	0.906458	3.52783	0.000418986	0.00191455	Phosphate carrier protein	Transport overview.Electrochemical Potential-driven Transporters.Porters.Mitochondrial Carrier.Phosphate carrier	AT2G17270
Vitvi03g00250	5705.8	-1.48786	0.174278	-8.53731	1.37e-17	6.96e-16	Unknown protein	Unknown	AT4G38225
Vitvi03g00253	730.594	2.17569	0.375343	5.79655	6.77e-09	9.57e-08	Cysteine endopeptidase, papain-type (XCP1)	Metabolism.Primary metabolism.Protein metabolism and modification.Proteolysis.Peptidase-mediated proteolysis	AT4G35350
Vitvi03g00258	223.721	3.56504	0.331848	10.743	6.39e-27	9.34e-25	Expansin EXPA20	Signaling.Hormone Signaling.Auxin Signaling.Auxin-mediated Signaling pathway	AT4G38210
Vitvi03g00263	32.8483	2.42682	0.649269	3.73777	0.000185659	0.000934162	AT-hook DNA-binding protein	Unknown	AT4G35390
Vitvi03g00267	399.654	1.58709	0.411682	3.85514	0.000115663	0.000620402	DC1 domain-containing protein	Unknown	AT2G16050
Vitvi03g00272	2199.01	1.31542	0.402101	3.27136	0.00107032	0.00431298	Phototropin-2	Transport overview.Channels and pores.a-Type channels.The Voltage-gated Ion Channel	AT5G58140
Vitvi03g00304	11672	-2.70941	0.311401	-8.70069	3.3e-18	1.78e-16	ADP-glucose pyrophosphorylase large subunit 1	Metabolism.Primary metabolism.Carbohydrate metabolism.Polysaccharide metabolism.Starch and sucrose metabolism	AT4G39210
Vitvi03g00311	82.2061	3.85157	0.67549	5.70189	1.18e-08	1.6e-07	Syntaxin 1B/2/3/4	Cellular process.Cellular transport.Protein trafficking.Vesicle-mediated trafficking.SNARE interactions in vesicular transport	AT2G18260
Vitvi03g00317	255.137	-1.30706	0.331998	-3.93694	8.25e-05	0.00045975	CPL4 (C-Terminal Domain Phosphatase-like 4)	Signaling.Signaling pathway.Protein phosphatase	AT5G58003
Vitvi03g00324	2148.35	-1.32568	0.201994	-6.56299	5.27e-11	1.06e-09	Unknown protein	Unknown	AT4G39235
Vitvi03g00340	11366.3	1.02612	0.217774	4.71185	2.45e-06	2e-05	Glucan endo-1,3-beta-glucosidase 7 precursor	Metabolism.Primary metabolism.Carbohydrate metabolism.Polysaccharide metabolism.Starch and sucrose metabolism	AT2G16230
Vitvi03g00352	516.772	4.33519	0.503029	8.61817	6.8e-18	3.54e-16	Dehydration-responsive protein (RD22)	Response to stimulus.Stress response.Abiotic stress response.Drought stress response	AT1G49320
Vitvi03g00353	1615.52	1.74734	0.276086	6.32897	2.47e-10	4.45e-09	No hit	No hit
Vitvi03g00354	87.6522	2.12916	0.813113	2.61853	0.00883091	0.0264066	BURP domain containing protein	Unknown	AT1G49320
Vitvi03g00359	9743.89	3.98256	0.887568	4.48704	7.22e-06	5.29e-05	Polyol transporter 5	Transport overview.Electrochemical Potential-driven Transporters.Porters.Major Facilitator Superfamily.Sugar Porter	AT3G18830
Vitvi03g00360	144.4	2.61638	0.365738	7.15369	8.45e-13	2.26e-11	PLATZ transcription factor	Regulation overview.Regulation of gene expression.Regulation of transcription.Transcription factor.PLATZ family transcription factor	AT3G60670
Vitvi03g00364	324.131	7.38345	0.731918	10.0878	6.26e-24	6.29e-22	UPF0326 protein hag1	Unknown	AT1G47740
Vitvi03g00365	104.589	1.25604	0.353322	3.55495	0.000378058	0.00174937	Minor allergen	Response to stimulus.Stress response.Biotic stress response	AT4G36750
Vitvi03g00369	158.951	1.02898	0.355203	2.89688	0.00376895	0.0128045	Unknown protein	Unknown	AT4G34320
Vitvi03g00380	150.889	5.21696	0.657303	7.93692	2.07e-15	8.06e-14	Unknown	Unknown
Vitvi03g00381	861.53	2.89217	0.422528	6.84492	7.65e-12	1.77e-10	DC1 domain-containing protein	Unknown	AT2G16050
Vitvi03g00386	427.817	-1.776	0.335587	-5.29222	1.21e-07	1.33e-06	Ring-H2 finger protein ATL3G	Unclear
Vitvi03g00388	138.721	-1.41121	0.332871	-4.23949	2.24e-05	0.000144465	Acyl-CoA synthetase long-chain member 2	Metabolism.Primary metabolism.Lipid metabolism.Fatty acid metabolism	AT1G49430
Vitvi03g00392	145.794	-2.91428	1.06767	-2.72956	0.0063419	0.0199924	AOS (allene oxide synthase)	Metabolism.Primary metabolism.Lipid metabolism.Fatty acid metabolism.Alpha-linolenic acid metabolism	AT5G42650
Vitvi03g00397	590.31	-2.00577	0.337076	-5.9505	2.67e-09	4.07e-08	Transducin protein	Unclear	AT2G26490
Vitvi03g00398	2284.32	-1.14364	0.14963	-7.64314	2.12e-14	7.19e-13	Extra-large G-protein (XLG1)	Signaling.Signaling pathway.G-protein signaling pathway	AT2G23460
Vitvi03g00414	43.5312	-2.2322	0.800044	-2.7901	0.00526917	0.0170489	Steroid nuclear receptor, ligand-binding	Unclassified	AT4G12680
Vitvi03g00415	296.291	2.19591	0.762861	2.87851	0.00399553	0.0134495	Cytochrome b6f complex subunit (petM)	Metabolism.Primary metabolism.Generation of metabolite precursors and energy.Photosynthesis.Photosynthetic-chain phosphorylation	AT2G26500
Vitvi03g00421	84.8459	2.54951	0.442737	5.75851	8.49e-09	1.18e-07	No hit	No hit
Vitvi03g00444	635.365	-2.95482	0.67982	-4.34648	1.38e-05	9.44e-05	Nodulin 1A, Senescence-associated	Metabolism.Cellular metabolism.Nitrogen and sulfur metabolism.Nitrogen metabolism.Nitrogen assimilation	AT3G19000
Vitvi03g00447	291.202	2.42923	0.241437	10.0616	8.17e-24	8.05e-22	Kinesin phragmoplast orienting kinesin 2	Cellular process.Cellular component organization and biogenesis.Cytoskeleton organization and biogenesis.Microtubule organization and biogenesis.Microtubule-driven movement	AT3G19050
Vitvi03g00473	427.153	1.87401	0.436263	4.29559	1.74e-05	0.000115629	Calmodulin-binding protein	Signaling.Signaling pathway.Calcium sensors and Signaling	AT2G15760
Vitvi03g00475	5475.07	2.24363	0.267974	8.37256	5.64e-17	2.67e-15	Serine carboxypeptidase	Metabolism.Primary metabolism.Protein metabolism and modification.Proteolysis.Peptidase-mediated proteolysis	AT3G63470
Vitvi03g00480	2093.98	1.77245	0.361192	4.90721	9.24e-07	8.37e-06	Carboxyesterase 12; CXE12	Metabolism.Cellular metabolism.Esterase activity	AT3G48690
Vitvi03g00482	536.674	1.06422	0.404915	2.62826	0.0085824	0.0257892	Carboxyesterase 12; CXE12	Metabolism.Cellular metabolism.Esterase activity	AT3G48690
Vitvi03g00483	1394.16	3.08538	0.528413	5.83895	5.25e-09	7.59e-08	Carboxylesterase CXE	Metabolism.Cellular metabolism.Esterase activity	AT1G47480
Vitvi03g00489	113.425	2.3385	0.529955	4.41264	1.02e-05	7.2e-05	Transcriptional factor B3	Regulation overview.Regulation of gene expression.Regulation of transcription.Transcription factor.ABI3 family transcription factor	AT3G19184
Vitvi03g00493	49.5522	3.27525	0.585284	5.596	2.19e-08	2.81e-07	Rad54	Metabolism.Primary metabolism.Nucleobase, nucleoside, nucleotide, nucleic acid metabolism.Nucleic acid metabolism.DNA metabolism.DNA recombination and repair.recombination	AT3G19210
Vitvi03g00502	12.5095	3.76667	1.21404	3.10259	0.00191837	0.00716685	Alpha-amylase / 1,4-alpha-D-glucan glucanohydrolase	Metabolism.Primary metabolism.Carbohydrate metabolism.Polysaccharide metabolism.Starch and sucrose metabolism.Starch biosynthesis catabolism.Starch catabolism	AT4G25000
Vitvi03g00505	111.565	1.48828	0.335454	4.43662	9.14e-06	6.52e-05	Lag one homologue 2	Metabolism.Primary metabolism.Lipid metabolism	AT3G19260
Vitvi03g00508	519.364	-1.28214	0.338127	-3.79189	0.000149507	0.000774825	ABA 8'-hydroxylase CYP707A1	Metabolism.Secondary metabolism.Terpenoid metabolism.Tetraterpenoid metabolism.Tetraterpenoid biosynthesis.Carotenoid biosynthesis	AT3G19270
Vitvi03g00509	5895.18	-1.22979	0.416634	-2.95172	0.00316009	0.0109851	Nitrite reductase	Metabolism.Cellular metabolism.Nitrogen and sulfur metabolism.Nitrogen metabolism.Nitrogen assimilation	AT2G15620
Vitvi03g00516	85.5591	2.78412	0.782018	3.56018	0.000370606	0.00172073	Receptor protein kinase	Signaling.Signaling pathway.Protein kinase	AT3G19300
Vitvi03g00519	876.916	1.85352	0.208569	8.88684	6.29e-19	3.73e-17	U-box domain-containing protein	Unknown	AT1G49780
Vitvi03g00533	726.694	1.45176	0.250238	5.80153	6.57e-09	9.32e-08	UDP-glucuronosyl/UDP-glucosyltransferase	Metabolism.Primary metabolism.Carbohydrate metabolism.Monosaccharide metabolism.Pentose glucuronate interconversion	AT2G15490
Vitvi03g00536	689.635	1.98671	0.353031	5.62758	1.83e-08	2.37e-07	LRX2 (leucine-rich repeat/extensin 2)	Cellular process.Cellular component organization and biogenesis.Cell wall organization and biogenesis.Cell wall structural protein	AT4G06744
Vitvi03g00537	3171.23	2.46651	0.303826	8.11814	4.73e-16	2e-14	LRX2 (leucine-rich repeat/extensin 2)	Cellular process.Cellular component organization and biogenesis.Cell wall organization and biogenesis.Cell wall structural protein	AT4G06744
Vitvi03g00542	655.866	3.94256	0.292403	13.4833	1.96e-41	1e-38	Cyclin D3_2	Signaling.Hormone Signaling.Cytokinin Signaling.Cytokinin-mediated Signaling pathway	AT5G67260
Vitvi03g00545	19256.9	1.56131	0.299017	5.22148	1.77e-07	1.88e-06	Cyclase	Unclear
Vitvi03g00552	789.586	1.10839	0.194925	5.68626	1.3e-08	1.74e-07	Acetyl xylan esterase AxeA	Unknown	AT4G34215
Vitvi03g00553	607.453	2.84108	0.508511	5.58707	2.31e-08	2.94e-07	Receptor protein kinase	Signaling.Signaling pathway.Protein kinase	AT4G37250
Vitvi03g00559	728.835	-1.69882	0.322256	-5.27163	1.35e-07	1.47e-06	Myb domain protein R1	Regulation overview.Regulation of gene expression.Regulation of transcription.Transcription factor.MYB family transcription factor	AT5G67300
Vitvi03g00569	2396.14	2.61503	0.307543	8.50297	1.85e-17	9.29e-16	Limonoid UDP-glucosyltransferase	Metabolism.Secondary metabolism.Phenylpropanoid metabolism.Phenylpropanoid biosynthesis
Vitvi03g00578	7.45626	6.15416	1.62602	3.7848	0.000153834	0.000793898	No hit	No hit
Vitvi03g00580	758.037	3.70297	0.991175	3.73594	0.000187017	0.00094003	Unknown protein	Unknown	AT2G15020
Vitvi03g00584	44.6693	2.24441	0.829614	2.70537	0.00682292	0.0212735	Cyclin A3;4	Cellular process.Cell growth and death	AT1G47230
Vitvi03g00586	3726.27	1.51021	0.585615	2.57884	0.00991331	0.0290067	Indole-3-acetic acid-amido synthetase GH3.8	Signaling.Hormone Signaling.Auxin Signaling.Auxin metabolism.Auxin inactivation by conjugation	AT2G14960
Vitvi03g00598	2712.95	4.77307	0.468566	10.1865	2.28e-24	2.5e-22	No hit	No hit
Vitvi03g00601	742.319	2.46024	0.35684	6.89453	5.4e-12	1.27e-10	Progesterone 5-beta-reductase	Metabolism.Primary metabolism.Lipid metabolism.Steroid metabolism.C21-Steroid hormone metabolism	AT4G24220
Vitvi03g00605	2880.36	-1.14416	0.232786	-4.91509	8.87e-07	8.09e-06	Protein phosphatase 2C	Signaling.Signaling pathway.Protein phosphatase.PP2C	AT4G33920
Vitvi03g00610	29.9563	3.12077	0.659299	4.73348	2.21e-06	1.82e-05	N-acetyltransferase ESCO2	Unclassified	AT4G31400
Vitvi03g00613	107.916	4.39636	0.607465	7.23722	4.58e-13	1.28e-11	Unknown protein	Unknown	AT1G49870
Vitvi03g00615	57.3049	-1.56116	0.599875	-2.60247	0.00925552	0.0274283	No hit	No hit
Vitvi03g00624	37.4219	3.7527	0.762967	4.91857	8.72e-07	7.96e-06	YGGT family protein	Transport overview.Incompletely characterized transport systems.Recognized transporters of unknown biochemical mechanism.YggT or Fanciful K+ Uptake-B	AT4G27990
Vitvi03g00633	803.342	1.09721	0.147821	7.42255	1.15e-13	3.51e-12	Mitotic checkpoint protein BUB3	Cellular process.Cell growth and death	AT1G49910
Vitvi03g00639	2827.72	-1.10683	0.225826	-4.90127	9.52e-07	8.61e-06	Interferon-related developmental regulator family	Regulation overview.Regulation of gene expression.Regulation of transcription	AT1G27760
Vitvi03g00666	1715.05	3.37372	0.329939	10.2253	1.53e-24	1.73e-22	LIM domain protein WLIM1	Regulation overview.Regulation of gene expression.Regulation of transcription.Transcription factor.LIM family transcription factor	AT1G10200
Vitvi03g00675	338.058	3.15516	0.424349	7.4353	1.04e-13	3.22e-12	Cyclin delta-2	Cellular process.Cell growth and death	AT1G70210
Vitvi03g00676	127.098	2.4785	0.542253	4.57075	4.86e-06	3.69e-05	1-aminocyclopropane-1-carboxylate oxidase	Metabolism.Primary metabolism.Organic acid metabolism.Propanoate metabolism	AT3G21420
Vitvi03g00677	37.5172	3.40361	0.856837	3.9723	7.12e-05	0.000402132	Unknown	Unknown
Vitvi03g00691	20.1556	7.59046	1.06205	7.14698	8.87e-13	2.37e-11	Sinapoylglucose:malate sinapoyltransferase (SNG1)	Metabolism.Secondary metabolism.Phenylpropanoid metabolism.Phenylpropanoid biosynthesis	AT1G33540
Vitvi03g00704	140.168	3.09977	0.485665	6.38252	1.74e-10	3.23e-09	Serine carboxypeptidase SCPL17	Metabolism.Primary metabolism.Protein metabolism and modification.Proteolysis.Peptidase-mediated proteolysis	AT3G10450
Vitvi03g00708	3688.5	1.71738	0.337181	5.09334	3.52e-07	3.48e-06	Serine carboxypeptidase S10	Metabolism.Primary metabolism.Protein metabolism and modification.Proteolysis.Peptidase-mediated proteolysis	AT3G12220
Vitvi03g00717	441.539	-1.73428	0.222574	-7.79195	6.6e-15	2.39e-13	Peptidase M50	Metabolism.Primary metabolism.Protein metabolism and modification.Proteolysis.Peptidase-mediated proteolysis	AT1G17870
Vitvi03g00721	16663.3	2.0449	0.253135	8.07829	6.57e-16	2.71e-14	Tubulin alpha	Cellular process.Cellular component organization and biogenesis.Cytoskeleton organization and biogenesis.Microtubule organization and biogenesis	AT1G50010
Vitvi03g00726	96.4948	9.84903	0.871831	11.2969	1.36e-29	2.54e-27	Unknown	Unknown
Vitvi03g00737	740.329	4.26152	0.323078	13.1903	9.97e-40	4.22e-37	Xyloglucan:xyloglucosyl transferase	Cellular process.Cellular component organization and biogenesis.Cell wall organization and biogenesis.Cell wall metabolism.Cell wall modification.Xyloglucan modification	AT2G14620
Vitvi03g00745	31.4993	4.32725	0.982172	4.4058	1.05e-05	7.41e-05	Pathogenesis-related protein 1 precursor (PRP 1)	Signaling.Hormone Signaling.Jasmonate salicylate signaling.Jasmonate Signaling.Jasmonate-mediated Signaling pathway	AT3G19690
Vitvi03g00752	12427.5	5.78766	0.936449	6.18043	6.39e-10	1.09e-08	Pathogenesis-related protein 1 precursor (PRP 1)	Signaling.Hormone Signaling.Jasmonate salicylate signaling.Jasmonate Signaling.Jasmonate-mediated Signaling pathway	AT2G14610
Vitvi03g00755	124.274	6.89855	1.03382	6.67285	2.51e-11	5.33e-10	Pathogenesis related protein 1 precursor [Vitis vinifera]	Signaling.Hormone Signaling.Jasmonate salicylate signaling.Jasmonate Signaling.Jasmonate-mediated Signaling pathway	AT2G14610
Vitvi03g00757	895.72	4.70878	0.595517	7.90704	2.64e-15	1.01e-13	Pathogenesis related protein 1 precursor [Vitis vinifera]	Signaling.Hormone Signaling.Jasmonate salicylate signaling.Jasmonate Signaling.Jasmonate-mediated Signaling pathway	AT1G50060
Vitvi03g00766	1911.27	-1.01344	0.170245	-5.9528	2.64e-09	4.02e-08	Metal transporter CNNM4 (Cyclin-M4)	Transport overview.Incompletely characterized transport systems.Recognized transporters of unknown biochemical mechanism.HlyC/CorC	AT2G14520
Vitvi03g00781	111.259	5.20052	0.594319	8.7504	2.13e-18	1.18e-16	Unknown protein	Unknown	AT4G17000
Vitvi03g00785	682.964	2.25866	0.60071	3.75998	0.000169927	0.00086476	Malate dehydrogenase, glyoxysomal precursor	Metabolism.Primary metabolism.Generation of metabolite precursors and energy.Citric acid cycle	AT5G09660
Vitvi03g00786	86.3226	1.32179	0.511845	2.58241	0.0098113	0.0287666	Unknown protein	Unknown	AT5G64510
Vitvi03g00791	285.428	3.35613	0.540222	6.21251	5.21e-10	8.98e-09	Basic helix-loop-helix (bHLH) family	Regulation overview.Regulation of gene expression.Regulation of transcription.Transcription factor.bHLH family transcription factor	AT4G37850
Vitvi03g00792	2025.67	1.39381	0.169031	8.24587	1.64e-16	7.33e-15	D-threo-aldose 1-dehydrogenase	Metabolism.Primary metabolism.Organic acid metabolism.Ascorbate and aldarate metabolism	AT4G33670
Vitvi03g00803	91.5804	2.78387	0.54317	5.12523	2.97e-07	3e-06	K+ efflux antiporter (KEA3)	Transport overview.Electrochemical Potential-driven Transporters.Porters.Monovalent Cation:Proton Antiporter-2	AT4G04850
Vitvi03g00811	108.446	2.44774	0.525719	4.65598	3.22e-06	2.56e-05	Concanavalin A lectin	Unknown	AT5G10530
Vitvi03g00813	4.54435	5.44113	2.26496	2.40231	0.016292	0.0439645	Concanavalin A lectin	Unknown	AT5G10530
Vitvi03g00814	5.30409	5.66615	1.53951	3.68049	0.000232788	0.00114044	No hit	No hit
Vitvi03g00819	372.515	-1.66545	0.276448	-6.02446	1.7e-09	2.69e-08	MADS-box agamous-like 21	Regulation overview.Regulation of gene expression.Regulation of transcription.Transcription factor.MADS-box family transcription factor	AT2G14210
Vitvi03g00842	2334.63	1.41826	0.225277	6.2956	3.06e-10	5.45e-09	Oligopeptide transporter OPT4	Transport overview.Electrochemical Potential-driven Transporters.Porters.Oligopeptide Transporter	AT5G64410
Vitvi03g00874	4.99816	5.578	2.21933	2.51337	0.0119583	0.0339889	Wall-associated kinase 1 (WAK1)	Signaling.Signaling pathway.Protein kinase	AT1G16120
Vitvi03g00882	107.457	3.80622	1.17138	3.24935	0.00115671	0.0046131	Wall-associated receptor kinase-like 10	Signaling.Signaling pathway.Protein kinase	AT1G16120
Vitvi03g00914	3.61292	5.10675	1.68933	3.02293	0.00250337	0.00898129	Receptor protein kinase RK20-1	Signaling.Signaling pathway.Protein kinase	AT5G10530
Vitvi03g00936	73.4379	1.73698	0.7018	2.47504	0.0133221	0.0371458	CF4	Response to stimulus.Stress response.Biotic stress response.Plant-pathogen interaction	AT3G05650
Vitvi03g01079	1465.65	-1.36626	0.197555	-6.91584	4.65e-12	1.11e-10	Subtilase	Metabolism.Primary metabolism.Protein metabolism and modification.Proteolysis.Peptidase-mediated proteolysis.Subtilase-mediated proteolysis	AT4G33625
Vitvi03g01097	2494.19	1.40493	0.307442	4.56974	4.88e-06	3.7e-05	UDP-d-apiose/udp-d-xylose synthase 1 AXS1	Metabolism.Primary metabolism.Carbohydrate metabolism.Polysaccharide metabolism.Starch and sucrose metabolism	AT1G08200
Vitvi03g01126	47.0674	4.07011	1.06105	3.83591	0.000125099	0.000664188	Retrotransposon	Transposable elements viral and plasmid proteins.Protein from transposable element	AT5G45480
Vitvi03g01144	338.98	-1.31228	0.428131	-3.06514	0.00217569	0.00797005	Peptidase C14, caspase catalytic subunit p20	Metabolism.Primary metabolism.Protein metabolism and modification.Proteolysis.Peptidase-mediated proteolysis	AT1G02170
Vitvi03g01149	76.2174	2.37197	0.919619	2.5793	0.00990005	0.0289818	Cis-zeatin O-beta-D-glucosyltransferase	Signaling.Hormone Signaling.Cytokinin Signaling.Cytokinin metabolism.Cytokinin inactivation by glycosylation	AT1G22380
Vitvi03g01169	53514.5	1.52917	0.204965	7.46064	8.61e-14	2.69e-12	Phosphate-induced protein 1	Unclear	AT5G09440
Vitvi03g01185	5152.33	4.88371	0.734587	6.64824	2.97e-11	6.25e-10	ABC transporter G member 7	Transport overview.Macromolecule transport.Multidrug transport.Multidrug ABC transport	AT1G17840
Vitvi03g01196	99.1763	4.55015	0.872981	5.2122	1.87e-07	1.96e-06	Disease resistance protein (CC-NBS-LRR class)	Diverse functions.Gene family with diverse functions.NBS-LRR superfamily	AT5G45500
Vitvi03g01200	67.3324	2.28122	0.628268	3.63098	0.000282352	0.00135428	Reticuline oxidase	Metabolism.Secondary metabolism.Primary amino acids derivated metabolism.Alkaloid metabolism.Alkaloid biosynthesis	AT4G20840
Vitvi03g01201	10.7836	2.32973	0.901567	2.58409	0.00976376	0.0286546	Berberine bridge enzyme	Metabolism.Secondary metabolism.Primary amino acids derivated metabolism.Alkaloid metabolism.Alkaloid biosynthesis	AT4G20840
Vitvi03g01204	60.1504	2.39854	0.650776	3.68565	0.000228116	0.00112066	Berberine bridge enzyme	Metabolism.Secondary metabolism.Primary amino acids derivated metabolism.Alkaloid metabolism.Alkaloid biosynthesis	AT4G20840
Vitvi03g01226	452.901	1.18007	0.33845	3.48667	0.000489066	0.00219351	Scarecrow transcription factor 23 (SCL23)	Regulation overview.Regulation of gene expression.Regulation of transcription.Transcription factor.GRAS family transcription factor	AT5G41920
Vitvi03g01233	3.41147	-5.42692	2.11919	-2.56085	0.0104416	0.0302782	Gamma-aminobutyrate transaminase subunit precursor isozyme 3	Metabolism.Primary metabolism.Amino acid metabolism.Glutamate metabolism	AT3G22200
Vitvi03g01235	104.705	-1.87933	0.372759	-5.04166	4.62e-07	4.45e-06	Annexin ANN3	Transport overview.Channels and pores.a-Type channels.Annexin	AT2G38760
Vitvi03g01260	263.62	4.16779	0.839203	4.96637	6.82e-07	6.36e-06	UDP-glucose glucosyltransferase	Metabolism.Primary metabolism.Carbohydrate metabolism.Polysaccharide metabolism.Starch and sucrose metabolism	AT3G21760
Vitvi03g01265	481.394	1.31869	0.532338	2.47717	0.0132429	0.0369677	Anthocyanidin 3-O-glucosyltransferase	Metabolism.Secondary metabolism.Phenylpropanoid metabolism.Flavonoid metabolism.Flavonoid biosynthesis.Anthocyanin biosynthesis.Anthocyanin-glycoside biosynthesis	AT3G21760
Vitvi03g01294	106.587	6.25487	0.966795	6.4697	9.82e-11	1.88e-09	Unknown	Unknown
Vitvi03g01300	779.353	4.24462	0.399344	10.629	2.18e-26	2.91e-24	Glucan endo-1,3-beta-glucosidase precursor	Metabolism.Primary metabolism.Carbohydrate metabolism.Polysaccharide metabolism.Starch and sucrose metabolism	AT1G79480
Vitvi03g01302	30.3956	2.51136	0.739803	3.39464	0.000687189	0.00294944	Leucine-rich repeat	Diverse functions.Gene family with diverse functions.NBS-LRR superfamily
Vitvi03g01303	139.673	4.02578	0.72637	5.54233	2.98e-08	3.71e-07	Myb family	Regulation overview.Regulation of gene expression.Regulation of transcription.Transcription factor.G2-like family transcription factor	AT1G79430
Vitvi03g01331	185.435	-1.7733	0.356702	-4.97138	6.65e-07	6.21e-06	Unknown protein	Unknown	AT2G16460
Vitvi03g01336	51.3755	3.37818	0.662383	5.10004	3.4e-07	3.38e-06	Auxin responsive SAUR protein	Signaling.Hormone Signaling.Auxin Signaling.Auxin-mediated Signaling pathway	AT1G75590
Vitvi03g01337	325.172	2.16161	0.396745	5.44837	5.08e-08	5.97e-07	Auxin-responsive	Signaling.Hormone Signaling.Auxin Signaling.Auxin-mediated Signaling pathway	AT1G75590
Vitvi03g01367	6.13598	5.87497	1.35322	4.34148	1.42e-05	9.61e-05	Auxin responsive SAUR protein	Signaling.Hormone Signaling.Auxin Signaling.Auxin-mediated Signaling pathway	AT4G38840
Vitvi03g01371	758409	-2.32117	0.367946	-6.30845	2.82e-10	5.05e-09	Unknown protein	Unknown
Vitvi03g01373	164.439	-1.77756	0.383508	-4.635	3.57e-06	2.8e-05	R protein PRF disease resistance protein	Response to stimulus.Stress response.Biotic stress response.Plant-pathogen interaction.R proteins from Plant-pathogen interaction	AT3G46530
Vitvi03g01378	17.9435	6.93363	1.23832	5.59923	2.15e-08	2.76e-07	Disease resistance protein (CC-NBS-LRR class)	Diverse functions.Gene family with diverse functions.NBS-LRR superfamily	AT1G53350
Vitvi03g01379	311.703	1.52411	0.233593	6.52464	6.82e-11	1.34e-09	R protein PRF disease resistance protein	Response to stimulus.Stress response.Biotic stress response.Plant-pathogen interaction.R proteins from Plant-pathogen interaction	AT1G53350
Vitvi03g01380	528.317	1.29906	0.179188	7.24969	4.18e-13	1.18e-11	R protein MLA10	Response to stimulus.Stress response.Biotic stress response.Plant-pathogen interaction.R proteins from Plant-pathogen interaction	AT1G53350
Vitvi03g01387	250.599	1.59991	0.32587	4.90965	9.12e-07	8.28e-06	Disease resistance protein (CC-NBS-LRR class)	Diverse functions.Gene family with diverse functions.NBS-LRR superfamily
Vitvi03g01392	292.809	3.2432	0.255324	12.7023	5.74e-37	2.01e-34	Amidase	Metabolism.Primary metabolism.Amino acid metabolism.Arginine and proline metabolism.Urea cycle	AT4G34880
Vitvi03g01393	27.9092	4.38806	1.38695	3.16382	0.00155713	0.00597355	Amidase	Metabolism.Primary metabolism.Amino acid metabolism.Arginine and proline metabolism.Urea cycle	AT4G34880
Vitvi03g01406	625.935	-1.22152	0.360324	-3.39006	0.00069877	0.00299126	Unknown protein	Unknown	AT1G33780
Vitvi03g01411	149.43	-1.39928	0.33785	-4.14171	3.45e-05	0.00021243	Protein phosphatase 2 (formerly 2A), regulatory subunit B'	Signaling.Signaling pathway.Calcium sensors and Signaling	AT3G09880
Vitvi03g01414	101.032	1.57823	0.377736	4.17814	2.94e-05	0.000184051	F-box family protein	Metabolism.Primary metabolism.Protein metabolism and modification.Proteolysis.cytoplasmic and nuclear protein degradation.Ubiquitin-mediated proteolysis	AT2G17030
Vitvi03g01428	75.8543	-2.64859	0.447645	-5.91673	3.28e-09	4.91e-08	Dimethylaniline monooxygenase (N-oxide forming) 2	Metabolism.single reactions	AT1G19250
Vitvi03g01430	4.20368	-5.72839	1.64135	-3.49004	0.00048294	0.00216881	Dimethylaniline monooxygenase (N-oxide forming) 2	Metabolism.single reactions	AT1G19250
Vitvi03g01431	674.69	-2.47495	0.341945	-7.23784	4.56e-13	1.27e-11	flavin-containing monooxygenase 1	Metabolism.single reactions	AT1G19250
Vitvi03g01432	12.5291	-3.50525	0.837663	-4.18456	2.86e-05	0.000179516	Flavin containing monooxygenase 3	Metabolism.single reactions
Vitvi03g01434	312.775	3.15846	0.471621	6.69703	2.13e-11	4.54e-10	Chitin elicitor-binding CEBIP LysM domain-containing	Response to stimulus.Stress response.Biotic stress response.Plant-pathogen interaction	AT2G17120
Vitvi03g01471	4.75288	-5.90642	2.08218	-2.83665	0.00455889	0.0150606	Auxin responsive SAUR protein	Signaling.Hormone Signaling.Auxin Signaling.Auxin-mediated Signaling pathway
Vitvi03g01474	19.5165	7.54268	1.09357	6.89732	5.3e-12	1.25e-10	Unknown	Unknown
Vitvi03g01481	104.445	-1.8519	0.543515	-3.40726	0.000656175	0.00283518	Dehydrin 1	Response to stimulus.Stress response.Abiotic stress response.Desiccation stress response
Vitvi03g01482	1605.14	-3.95818	0.616181	-6.42374	1.33e-10	2.5e-09	Unknown	Unknown
Vitvi03g01483	115.277	1.04859	0.338846	3.09458	0.00197091	0.00732937	SNF1-Related protein kinase regulatory subunit gamma 1	Signaling.Signaling pathway.Protein kinase	AT3G48530
Vitvi03g01499	7.90338	6.23829	1.52216	4.09831	4.16e-05	0.000251068	No hit	No hit
Vitvi03g01501	23.7335	7.82556	1.12041	6.98456	2.86e-12	7.1e-11	Unknown	Unknown
Vitvi03g01514	19.2292	-4.81353	1.30327	-3.69341	0.000221265	0.00109094	No hit	No hit
Vitvi03g01520	23766.6	-1.13344	0.194298	-5.83349	5.43e-09	7.8e-08	No hit	No hit
Vitvi03g01524	205.716	3.63203	0.758618	4.78769	1.69e-06	1.43e-05	flavonoid 3-monooxygenase	Metabolism.Secondary metabolism.Phenylpropanoid metabolism.Flavonoid metabolism.Flavonoid biosynthesis	AT4G31940
Vitvi03g01528	16.3663	7.28867	1.49332	4.88086	1.06e-06	9.44e-06	No hit	No hit
Vitvi03g01529	30.4543	4.55618	1.30935	3.47972	0.000501934	0.00224343	CYP82C4	Metabolism.Secondary metabolism.Terpenoid metabolism.Monoterpenoid metabolism.Monoterpenoid biosynthesis	AT4G31970
Vitvi03g01530	5.91635	5.81829	1.28293	4.53517	5.76e-06	4.29e-05	CYP82C2	Metabolism.Cellular metabolism.Oxidation reduction.Cytochrome P450 oxidoreductase	AT4G31970
Vitvi03g01531	122.131	3.98289	1.06507	3.73957	0.000184336	0.000928429	CYP82C1p	Metabolism.Cellular metabolism.Oxidation reduction.Cytochrome P450 oxidoreductase	AT4G31970
Vitvi03g01535	6.00416	5.84192	1.56645	3.72941	0.000191929	0.00096203	CYP82C1p	Metabolism.Cellular metabolism.Oxidation reduction.Cytochrome P450 oxidoreductase	AT4G31970
Vitvi03g01543	1347.1	-1.13214	0.425261	-2.66222	0.00776267	0.0236859	Nodulin 1A, Senescence-associated	Metabolism.Cellular metabolism.Nitrogen and sulfur metabolism.Nitrogen metabolism.Nitrogen assimilation	AT3G19000
Vitvi03g01567	82.6216	2.00889	0.770521	2.60719	0.0091289	0.0271149	Fw2.2 ORFX	Unknown	AT5G35525
Vitvi03g01572	5488.88	2.49938	0.348142	7.17919	7.01e-13	1.89e-11	Alpha-amylase / 1,4-alpha-D-glucan glucanohydrolase	Metabolism.Primary metabolism.Carbohydrate metabolism.Polysaccharide metabolism.Starch and sucrose metabolism.Starch biosynthesis catabolism.Starch catabolism	AT4G25000
Vitvi03g01573	520.355	-1.77566	0.214309	-8.28552	1.18e-16	5.35e-15	No hit	No hit
Vitvi03g01574	9445.53	-1.32192	0.173508	-7.61881	2.56e-14	8.58e-13	No hit	No hit
Vitvi03g01591	31.3209	1.31671	0.541947	2.42959	0.0151157	0.0413027	No hit	No hit
Vitvi03g01597	3292.4	2.14714	0.478003	4.49188	7.06e-06	5.19e-05	NtPRp27 secretory protein	Response to stimulus.Stress response.Biotic stress response	AT2G15220
Vitvi03g01602	1120.09	-7.99854	1.06728	-7.49432	6.66e-14	2.12e-12	Unknown protein	Unknown	AT3G19550
Vitvi03g01603	2943.62	-7.80761	1.19004	-6.56081	5.35e-11	1.07e-09	Unknown protein	Unknown	AT3G19550
Vitvi03g01604	37.2385	-4.97703	1.16241	-4.28163	1.86e-05	0.000122162	Unknown	Unknown
Vitvi03g01606	88.2639	-2.46241	0.539774	-4.56193	5.07e-06	3.82e-05	No hit	No hit
Vitvi03g01615	704.731	1.20432	0.289095	4.16584	3.1e-05	0.000193079	Meprin and TRAF homology domain-containing protein	Unclear	AT3G17380
Vitvi03g01621	2950.38	1.8677	0.368828	5.06387	4.11e-07	4e-06	Serine carboxypeptidase S10	Metabolism.Primary metabolism.Protein metabolism and modification.Proteolysis.Peptidase-mediated proteolysis	AT3G10450
Vitvi03g01626	227.728	1.20562	0.470872	2.56041	0.0104549	0.0303061	Serine carboxypeptidase SCPL17	Metabolism.Primary metabolism.Protein metabolism and modification.Proteolysis.Peptidase-mediated proteolysis	AT3G10450
Vitvi03g01632	958.758	-1.17905	0.217571	-5.41913	5.99e-08	6.95e-07	Replication factor A 1, rfa1	Metabolism.Primary metabolism.Nucleobase, nucleoside, nucleotide, nucleic acid metabolism.Nucleic acid metabolism.DNA metabolism.DNA replication
Vitvi03g01639	727.582	1.05082	0.31218	3.36608	0.000762435	0.00322222	Tubulin alpha-6 chain	Cellular process.Cellular component organization and biogenesis.Cytoskeleton organization and biogenesis.Microtubule organization and biogenesis	AT1G50020
Vitvi03g01651	2867.41	2.42622	0.737241	3.29095	0.000998489	0.00406775	Pathogenesis-related protein 1 precursor (PRP 1)	Signaling.Hormone Signaling.Jasmonate salicylate signaling.Jasmonate Signaling.Jasmonate-mediated Signaling pathway	AT2G14580
Vitvi03g01676	66.9896	1.69861	0.384897	4.41316	1.02e-05	7.19e-05	Unknown	Unknown
Vitvi03g01684	142.096	-1.04411	0.247795	-4.2136	2.51e-05	0.000159714	No hit	No hit
Vitvi03g01704	323.06	-1.10783	0.204411	-5.41961	5.97e-08	6.94e-07	ATHVA22A (Arabidopsis thaliana HVA22 homologue A)	Signaling.Hormone Signaling.ABA Signaling.ABA-mediated Signaling pathway	AT1G74520
Vitvi03g01709	85.0164	-1.73709	0.273032	-6.36222	1.99e-10	3.64e-09	No hit	No hit
Vitvi03g01746	22.5932	2.62685	1.11209	2.36209	0.0181721	0.0481781	No hit	No hit
Vitvi03g01759	716.371	10.227	1.13473	9.01277	2.01e-19	1.25e-17	Copper transporter 2	Transport overview.Channels and pores.a-Type channels.Copper Transporter
Vitvi03g01760	3.97912	5.24503	1.79261	2.92592	0.00343441	0.0118202	Copper transporter 2	Transport overview.Channels and pores.a-Type channels.Copper Transporter
Vitvi03g01805	250.187	-1.1303	0.361386	-3.12767	0.00176199	0.00665022	flavonol synthase	Metabolism.Secondary metabolism.Phenylpropanoid metabolism.Flavonoid metabolism.Flavonoid biosynthesis	AT2G44800
Vitvi03g01817	15.3555	2.25989	0.759171	2.97679	0.00291286	0.010229	R protein PRF disease resistance protein	Response to stimulus.Stress response.Biotic stress response.Plant-pathogen interaction.R proteins from Plant-pathogen interaction
Vitvi03g01833	359.02	2.89694	1.05917	2.73509	0.00623624	0.0197048	ABC transporter G member 7	Transport overview.Macromolecule transport.Multidrug transport.Multidrug ABC transport	AT1G17840
Vitvi03g01834	21.2808	7.66814	1.55585	4.92859	8.28e-07	7.59e-06	ABC transporter G member 7	Transport overview.Macromolecule transport.Multidrug transport.Multidrug ABC transport	AT1G17840
Vitvi03g01841	331.917	1.2317	0.351198	3.50713	0.000452967	0.00205186	Berberine bridge enzyme	Metabolism.Secondary metabolism.Primary amino acids derivated metabolism.Alkaloid metabolism.Alkaloid biosynthesis	AT4G20840
Vitvi03g01855	459.541	-1.18724	0.251876	-4.71359	2.43e-06	1.99e-05	No hit	No hit
Vitvi03g01861	2.87063	4.78118	1.94263	2.46118	0.013848	0.0383599	No hit	No hit
Vitvi03g01869	420.638	3.29514	0.632341	5.21102	1.88e-07	1.97e-06	Anthocyanidin 3-O-glucosyltransferase	Metabolism.Secondary metabolism.Phenylpropanoid metabolism.Flavonoid metabolism.Flavonoid biosynthesis.Anthocyanin biosynthesis.Anthocyanin-glycoside biosynthesis	AT3G21760
Vitvi03g01897	2273.38	1.30152	0.336238	3.87084	0.000108462	0.000585876	Acyltransferase	Unknown
Vitvi04g00009	2363.56	-1.64026	0.523661	-3.1323	0.00173445	0.00656344	NADP-dependent malic enzyme	Metabolism.Primary metabolism.Carbohydrate metabolism.Monosaccharide metabolism.Pyruvate metabolism	AT1G79750
Vitvi04g00013	48.5189	-2.03304	0.806023	-2.52231	0.0116588	0.0332573	IAA6	Signaling.Hormone Signaling.Auxin Signaling.Auxin-mediated Signaling pathway	AT3G16500
Vitvi04g00021	450.092	1.89648	0.42873	4.42349	9.71e-06	6.88e-05	Clavata1 receptor kinase (CLV1)	Signaling.Signaling pathway.Protein kinase	AT5G25930
Vitvi04g00022	176.634	2.29083	0.516175	4.43809	9.08e-06	6.48e-05	Clavata1 receptor kinase (CLV1)	Signaling.Signaling pathway.Protein kinase	AT5G25930
Vitvi04g00024	51.8364	3.7155	0.982979	3.77984	0.000156929	0.000808172	Clavata1 receptor kinase (CLV1)	Signaling.Signaling pathway.Protein kinase	AT5G25930
Vitvi04g00041	337.215	3.96336	0.286283	13.8442	1.38e-43	9.67e-41	Serine/threonine-protein kinase Aurora-1	Cellular process.Cell growth and death	AT4G32830
Vitvi04g00042	21.8419	-3.05156	0.814381	-3.74709	0.000178897	0.00090403	Oleosin OLE-3	Cellular process.Cellular component organization and biogenesis.Oil body organization and biogenesis	AT2G25890
Vitvi04g00049	147.314	2.63303	0.520253	5.06107	4.17e-07	4.06e-06	Myb domain protein 68	Regulation overview.Regulation of gene expression.Regulation of transcription.Transcription factor.MYB family transcription factor	AT5G65790
Vitvi04g00071	103.784	5.14593	0.77308	6.6564	2.81e-11	5.93e-10	Phosphoethanolamine/phosphocholine phosphatase	Metabolism.Primary metabolism.Lipid metabolism.Glycerolipid metabolism.Glycerophospholipid metabolism	AT1G17710
Vitvi04g00076	1805.29	-1.71831	0.178156	-9.64498	5.16e-22	4.28e-20	MYB divaricata	Development.Reproductive development.Flower development	AT5G56840
Vitvi04g00085	160.075	-1.0726	0.374957	-2.86059	0.0042286	0.014128	Lysine decarboxylase	Metabolism.Primary metabolism.Amino acid metabolism.Lysine metabolism	AT5G11950
Vitvi04g00089	103.769	5.8704	0.863449	6.79878	1.06e-11	2.38e-10	Calmodulin-binding region IQD6	Signaling.Signaling pathway.Calcium sensors and Signaling	AT2G26180
Vitvi04g00092	2910.89	-2.6971	0.375334	-7.18588	6.68e-13	1.81e-11	Heat shock transcription factor A6B	Metabolism.Primary metabolism.Protein metabolism and modification.Protein folding.Chaperone-mediated protein folding.HSP-mediated protein folding	AT2G26150
Vitvi04g00096	271.278	1.02656	0.367989	2.78966	0.00527639	0.0170677	Indeterminate(ID)-domain 7	Regulation overview.Regulation of gene expression.Regulation of transcription.Transcription factor.C2H2 family transcription factor	AT3G13810
Vitvi04g00111	468.312	4.02796	1.6574	2.43029	0.0150867	0.0412325	CGA1 (cytokinin-responsive GATA factor 1)	Signaling.Hormone Signaling.Cytokinin Signaling.Cytokinin-mediated Signaling pathway	AT4G26150
Vitvi04g00112	5399.11	1.55536	0.40247	3.86452	0.000111306	0.000598994	Glycine dehydrogenase	Metabolism.Primary metabolism.Amino acid metabolism.Glycine, serine, and threonine metabolism	AT4G33010
Vitvi04g00118	156.564	3.48683	0.510745	6.82694	8.67e-12	1.98e-10	Tassel serine threonine kinase 1	Signaling.Signaling pathway.Protein kinase	AT5G12000
Vitvi04g00135	2607.11	-3.68784	0.601205	-6.13409	8.56e-10	1.43e-08	Heat shock protein 17.6 kDa class II	Metabolism.Primary metabolism.Protein metabolism and modification.Protein folding.Chaperone-mediated protein folding.HSP-mediated protein folding	AT5G12020
Vitvi04g00155	241.943	3.49631	0.373123	9.37041	7.22e-21	5.32e-19	Myb domain protein 4	Regulation overview.Regulation of gene expression.Regulation of transcription.Transcription factor.MYB family transcription factor	AT4G38620
Vitvi04g00156	16.5949	6.32954	1.71697	3.68646	0.000227394	0.00111734	TT2 (transparent testa 2)	Cellular process.Cell growth and death	AT5G35550
Vitvi04g00157	11.3651	6.27245	1.36647	4.59025	4.43e-06	3.39e-05	Myb domain protein 32	Regulation overview.Regulation of gene expression.Regulation of transcription.Transcription factor.MYB family transcription factor	AT4G34990
Vitvi04g00159	480.802	5.14585	1.07357	4.79322	1.64e-06	1.4e-05	CYP72A58	Metabolism.Secondary metabolism.Terpenoid metabolism.Monoterpenoid metabolism.Monoterpenoid biosynthesis	AT3G14690
Vitvi04g00160	36.2012	4.21029	0.947885	4.44178	8.92e-06	6.38e-05	ATMYB66/WER/WER1 (WEREWOLF 1)	Cellular process.Cell growth and death	AT5G14750
Vitvi04g00164	1244.56	1.3545	0.374994	3.61207	0.00030376	0.00144398	ferredoxin-related	Metabolism.Primary metabolism.Generation of metabolite precursors and energy.Photosynthesis.Photosynthetic-chain phosphorylation	AT1G02180
Vitvi04g00178	3036.69	-2.66553	0.300308	-8.87599	6.93e-19	4.05e-17	Hydrolase, alpha/beta fold	Unknown	AT4G33180
Vitvi04g00182	202.792	1.22299	0.437483	2.79552	0.0051816	0.0167988	Copper transporter 5	Transport overview.Channels and pores.a-Type channels.Copper Transporter	AT1G72510
Vitvi04g00188	759.933	1.18936	0.194609	6.11155	9.87e-10	1.62e-08	3-beta-hydroxy-delta5-steroid dehydrogenase	Metabolism.Primary metabolism.Lipid metabolism.Steroid metabolism.C21-Steroid hormone metabolism	AT2G26260
Vitvi04g00189	105.765	1.52905	0.290597	5.26175	1.43e-07	1.54e-06	Sterile alpha motif (SAM) domain-containing protein	Unclear	AT2G45700
Vitvi04g00216	247.099	1.86504	0.586328	3.18088	0.00146829	0.00568518	Receptor kinase homolog LRK10	Signaling.Signaling pathway.Protein kinase	AT1G70250
Vitvi04g00223	338.21	2.87411	0.197887	14.524	8.54e-48	9.1e-45	Replicon protein A (ATRPA2/ROR1/RPA2)	Metabolism.Primary metabolism.Nucleobase, nucleoside, nucleotide, nucleic acid metabolism.Nucleic acid metabolism.DNA metabolism.DNA replication	AT2G24490
Vitvi04g00224	508.298	1.70779	0.231705	7.37053	1.7e-13	5.06e-12	V-type H+-transporting ATPase subunit A	Metabolism.Primary metabolism.Generation of metabolite precursors and energy.Electron transport.Respiratory-chain phosphorylation	AT1G78900
Vitvi04g00232	237.835	1.42686	0.377334	3.78143	0.000155927	0.000803516	Cryptochrome DASH	Signaling.Signaling pathway.Circadian clock Signaling	AT5G24850
Vitvi04g00236	809.667	-2.57446	0.683912	-3.76432	0.000167003	0.00085253	NAC domain containing protein 39	Regulation overview.Regulation of gene expression.Regulation of transcription.Transcription factor.NAC family transcription factor	AT2G24430
Vitvi04g00241	1465.21	-1.84978	0.771847	-2.39656	0.0165496	0.0445556	Unknown protein	Unknown	AT4G31330
Vitvi04g00242	393.086	2.55086	0.325808	7.82931	4.91e-15	1.82e-13	Syntaxin-related protein KNOLLE	Cellular process.Cellular transport.Protein trafficking.Vesicle-mediated trafficking.SNARE interactions in vesicular transport	AT1G08560
Vitvi04g00252	2914.93	-1.85804	0.254205	-7.30923	2.69e-13	7.79e-12	Cation transport protein chaC	Transport overview.Incompletely characterized transport systems.Putative transport protein.Transporter unknown	AT4G31290
Vitvi04g00254	124.631	4.90088	0.64914	7.54981	4.36e-14	1.42e-12	Extracellular ligand-gated ion channel	Transport overview.Incompletely characterized transport systems.Putative transport protein.Transporter unknown	AT2G21080
Vitvi04g00255	19.1625	1.82357	0.774416	2.35476	0.0185345	0.0489116	Receptor kinase	Signaling.Signaling pathway.Protein kinase	AT4G31250
Vitvi04g00257	91.2012	-1.87765	0.232855	-8.0636	7.41e-16	3.03e-14	Tassel serine threonine kinase 1	Signaling.Signaling pathway.Protein kinase	AT2G24370
Vitvi04g00267	1258.61	1.09354	0.178897	6.11269	9.8e-10	1.61e-08	Acetylglutamate kinase	Metabolism.Primary metabolism.Amino acid metabolism.Arginine and proline metabolism.Urea cycle	AT3G57560
Vitvi04g00281	203.171	2.15735	0.492007	4.3848	1.16e-05	8.06e-05	F-box family protein (FBX13)	Metabolism.Primary metabolism.Protein metabolism and modification.Proteolysis.cytoplasmic and nuclear protein degradation.Ubiquitin-mediated proteolysis	AT4G33160
Vitvi04g00286	826.558	2.14081	0.284135	7.53448	4.9e-14	1.59e-12	BAM2 (big apical meristem 2)	Development.Reproductive development.Flower development	AT2G25790
Vitvi04g00289	17.7485	2.38131	0.888905	2.67893	0.00738588	0.0227113	GATA transcription factor 11	Regulation overview.Regulation of gene expression.Regulation of transcription.Transcription factor.C2C2-GATA family transcription factor	AT5G25830
Vitvi04g00297	765.64	-1.20304	0.132835	-9.05668	1.34e-19	8.57e-18	YebC	Unknown	AT2G25830
Vitvi04g00300	1522.9	-1.30698	0.229913	-5.6847	1.31e-08	1.75e-07	DREB sub A-4 of ERF/AP2 transcription factor	Signaling.Hormone Signaling.Ethylene Signaling.Ethylene-mediated Signaling pathway	AT5G11590
Vitvi04g00307	7.57766	6.17731	2.05012	3.01315	0.0025855	0.00923892	Aquaporin TIP4;1	Transport overview.Channels and pores.a-Type channels.Major Intrinsic Protein	AT2G25810
Vitvi04g00308	54.3532	5.59733	1.00163	5.5882	2.29e-08	2.92e-07	Unknown protein	Unknown	AT3G22810
Vitvi04g00318	13.886	2.6587	1.07956	2.46276	0.0137872	0.0382184	FAD-binding domain-containing protein	Unclear	AT5G11540
Vitvi04g00349	240.768	4.64542	1.60222	2.89936	0.00373927	0.0127248	RD22 [Vitis vinifera]	Response to stimulus.Stress response.Abiotic stress response.Drought stress response	AT5G25610
Vitvi04g00350	239.194	-3.60348	0.531563	-6.77901	1.21e-11	2.7e-10	RD22	Response to stimulus.Stress response.Abiotic stress response.Drought stress response	AT5G25610
Vitvi04g00352	18465.6	5.06447	1.38183	3.66504	0.000247298	0.00120476	RD22	Response to stimulus.Stress response.Abiotic stress response.Drought stress response	AT5G25610
Vitvi04g00357	152.128	4.8037	0.829371	5.79198	6.96e-09	9.82e-08	Dehydration-responsive protein (RD22)	Response to stimulus.Stress response.Abiotic stress response.Drought stress response	AT5G25610
Vitvi04g00361	157.396	4.36799	0.531176	8.22324	1.98e-16	8.8e-15	Unknown protein	Unknown	AT5G25590
Vitvi04g00369	247.501	4.73618	0.527779	8.9738	2.86e-19	1.75e-17	Cyclin A2	Cellular process.Cell growth and death	AT5G11300
Vitvi04g00387	1868.65	-1.31971	0.341145	-3.86847	0.00010952	0.000590943	Zinc finger, SWIM-type	Regulation overview.Regulation of gene expression.Regulation of transcription.Transcription factor.Zinc finger SWIM family transcription factor	AT1G60560
Vitvi04g00388	25578.9	-1.55697	0.295952	-5.26089	1.43e-07	1.55e-06	Zinc finger (C3HC4-type ring finger)	Regulation overview.Regulation of gene expression.Regulation of transcription.Transcription factor.Zinc finger C3HC4 family transcription factor	AT5G25560
Vitvi04g00394	67.6145	2.47911	0.748081	3.31395	0.000919867	0.00378142	Aminoacyl-tRNA synthetase, related	Metabolism.Primary metabolism.Amino acid metabolism.Alanine and aspartate metabolism	AT5G25580
Vitvi04g00433	625.389	-1.35294	0.554943	-2.43797	0.0147699	0.0404811	2-oxoglutarate-dependent dioxygenase	Metabolism.Cellular metabolism.Oxidation reduction	AT1G52820
Vitvi04g00442	4420.95	2.27776	0.536601	4.24478	2.19e-05	0.000141461	Unknown protein	Unknown	AT5G11420
Vitvi04g00452	541.901	1.96082	0.258558	7.58367	3.36e-14	1.11e-12	Unknown	Unknown
Vitvi04g00454	3491.88	1.20516	0.211098	5.70899	1.14e-08	1.54e-07	Phospholipase/carboxylesterase	Metabolism.Cellular metabolism.Esterase activity	AT5G20060
Vitvi04g00455	132.337	2.71676	0.380222	7.14519	8.99e-13	2.4e-11	TSO1 (chinese for 'ugly')	Regulation overview.Regulation of gene expression.Regulation of transcription.Transcription factor.CPP family transcription factor	AT3G22780
Vitvi04g00467	60.8782	-2.66158	0.619965	-4.29312	1.76e-05	0.000116735	Expansin family protein (EXPR3)	Signaling.Hormone Signaling.Auxin Signaling.Auxin-mediated Signaling pathway	AT2G18660
Vitvi04g00480	130.61	2.92957	0.663357	4.41628	1e-05	7.1e-05	Phospholipase D alpha 1 precursor (PLD 1) (Choline phosphatase 1)	Metabolism.Primary metabolism.Lipid metabolism.Glycerolipid metabolism.Glycerophospholipid metabolism.Glycerophospholipid catabolism	AT3G15730
Vitvi04g00489	139.684	1.27392	0.350256	3.6371	0.000275725	0.00132719	Unknown protein	Unknown	AT4G32290
Vitvi04g00491	62.306	3.40788	0.882392	3.8621	0.000112417	0.000604314	SHR5-receptor-like kinase	Signaling.Signaling pathway.Protein kinase	AT1G56130
Vitvi04g00495	302.929	1.34891	0.321248	4.19897	2.68e-05	0.000169338	Unknown protein	Unknown	AT4G32270
Vitvi04g00501	544.188	9.93656	1.50414	6.60614	3.94e-11	8.13e-10	Protease inhibitor/seed storage/lipid transfer protein (LTP)	Transport overview.Macromolecule transport.Lipid transport	AT4G12510
Vitvi04g00506	1464.8	-2.81747	0.656536	-4.29142	1.78e-05	0.00011744	ACT domain-containing protein	Unknown	AT5G25320
Vitvi04g00509	59.4979	1.90494	0.519406	3.66754	0.000244894	0.00119471	ATSYTE/NTMC2T2.1/NTMC2TYPE2.1/SYTE	Transport overview.Incompletely characterized transport systems.Recognized transporters of unknown biochemical mechanism.Unconventional Protein Secretion System	AT5G11100
Vitvi04g00510	395.494	1.09214	0.326838	3.34154	0.00083315	0.00347971	WRKY DNA-binding protein 18	Regulation overview.Regulation of gene expression.Regulation of transcription.Transcription factor.WRKY family transcription factor	AT4G31800
Vitvi04g00517	570.987	3.7588	0.489978	7.67136	1.7e-14	5.85e-13	Armadillo/beta-catenin repeat	Unknown	AT4G31890
Vitvi04g00522	1042.49	-1.95395	0.256249	-7.62521	2.44e-14	8.2e-13	CLPB-M/CLPB4/HSP98.7	Transport overview.Incompletely characterized transport systems.Recognized transporters of unknown biochemical mechanism.Type VI Symbiosis/Virulence Sec Ptw	AT2G25140
Vitvi04g00533	1016.94	1.18039	0.350573	3.36701	0.000759872	0.00321416	Ethylene-responsive transcription factor ERF003	Signaling.Hormone Signaling.Ethylene Signaling.Ethylene-mediated Signaling pathway	AT5G25190
Vitvi04g00538	805.922	2.89091	0.416821	6.93561	4.04e-12	9.75e-11	Phytosulfokine receptor precursor	Signaling.Signaling pathway.Signaling molecules.Signaling peptide.Ligand peptide	AT2G25220
Vitvi04g00549	11489.7	-1.12629	0.28835	-3.906	9.38e-05	0.000515501	Unknown protein	Unknown	AT5G25265
Vitvi04g00552	349.451	2.58706	0.513082	5.04219	4.6e-07	4.44e-06	Nodulin	Response to stimulus.Stress response.Biotic stress response	AT5G25250
Vitvi04g00564	81.8969	2.61548	0.775873	3.37102	0.000748901	0.00317595	Leucine-rich repeat family	Diverse functions.Gene family with diverse functions.NBS-LRR superfamily	AT1G74170
Vitvi04g00567	1509.98	-1.09386	0.158327	-6.90889	4.88e-12	1.16e-10	TPR1 (topless-related 1)	Signaling.Hormone Signaling.Auxin Signaling.Auxin-mediated Signaling pathway	AT1G80490
Vitvi04g00586	108.183	1.56623	0.326232	4.80098	1.58e-06	1.35e-05	formin-2	Cellular process.Cellular component organization and biogenesis.Cytoskeleton organization and biogenesis.Actin organization and biogenesis	AT2G25050
Vitvi04g00594	1987.97	1.19366	0.353195	3.37961	0.000725881	0.00308755	Chorismate mutase, cytosolic (CM2)	Metabolism.Primary metabolism.Amino acid metabolism.Aromatic amino acid metabolism.Aromatic amino acid biosynthesis	AT5G10870
Vitvi04g00595	99.9971	2.26181	0.275767	8.20189	2.37e-16	1.04e-14	Kinetochore protein NUF2	Cellular process.Cell growth and death.Cell division.Mitosis	AT1G61000
Vitvi04g00602	862.802	6.8315	0.610564	11.1888	4.62e-29	7.99e-27	Plastocyanin domain-containing protein	Metabolism.Primary metabolism.Generation of metabolite precursors and energy.Photosynthesis.Photosynthetic-chain phosphorylation	AT5G25090
Vitvi04g00646	71.9566	5.25259	0.831085	6.32016	2.61e-10	4.71e-09	Aspartyl protease	Metabolism.Primary metabolism.Protein metabolism and modification.Proteolysis.Peptidase-mediated proteolysis
Vitvi04g00650	54.5778	9.02763	0.905001	9.97528	1.96e-23	1.87e-21	No hit	No hit
Vitvi04g00680	30.1179	3.95966	1.40191	2.82448	0.0047357	0.0155421	Glutamate receptor protein	Transport overview.Channels and pores.a-Type channels.Glutamate-gated Ion Channel of Neurotransmitter Receptors	AT2G29120
Vitvi04g00747	167.387	2.34601	0.599269	3.91478	9.05e-05	0.000498996	Sarcosine oxidase	Metabolism.Primary metabolism.Amino acid metabolism.Glycine, serine, and threonine metabolism	AT2G24580
Vitvi04g00761	159.324	5.55206	0.75104	7.39249	1.44e-13	4.35e-12	Ulp1 protease , C-terminal catalytic domain containing protein	Metabolism.Primary metabolism.Protein metabolism and modification.Proteolysis.Peptidase-mediated proteolysis	AT5G37010
Vitvi04g00769	125.473	1.55983	0.605294	2.57698	0.00996677	0.0291423	DNA-binding protein PD3, chloroplast	Regulation overview.Regulation of gene expression.Regulation of transcription.Transcription factor.Jumonji family transcription factor	AT1G11950
Vitvi04g00790	183.853	-1.1208	0.385147	-2.91007	0.00361352	0.01235	NC domain-containing protein	Unknown	AT3G02700
Vitvi04g00798	3916.01	-2.12442	0.817451	-2.59883	0.00935419	0.0276678	Alpha-amylase/subtilisin inhibitor	Metabolism.Primary metabolism.Carbohydrate metabolism.Polysaccharide metabolism.Starch and sucrose metabolism.Starch biosynthesis catabolism.Starch catabolism inhibitor	AT1G17860
Vitvi04g00800	395.229	-1.56807	0.516406	-3.03651	0.00239336	0.00864735	RKF2 (receptor-like serine/threonine kinase 2)	Signaling.Signaling pathway.Protein kinase	AT1G70520
Vitvi04g00831	291.364	3.30404	0.729058	4.53192	5.84e-06	4.35e-05	Sucrose synthase	Metabolism.Primary metabolism.Carbohydrate metabolism.Polysaccharide metabolism.Starch and sucrose metabolism	AT1G73370
Vitvi04g00832	266.194	-1.01488	0.32349	-3.13727	0.0017053	0.0064661	Leucine Rich Repeat receptor-like kinase	Signaling.Signaling pathway.Protein kinase	AT4G08850
Vitvi04g00836	425.827	2.90173	0.374897	7.74006	9.94e-15	3.52e-13	Unknown protein	Unknown	AT1G65900
Vitvi04g00837	97.4297	3.33898	0.68299	4.88877	1.01e-06	9.11e-06	NAC domain-containing protein 28	Regulation overview.Regulation of gene expression.Regulation of transcription.Transcription factor.NAC family transcription factor	AT1G65910
Vitvi04g00870	14010.9	1.06365	0.118799	8.95337	3.45e-19	2.09e-17	No hit	No hit
Vitvi04g00874	218.311	-1.04231	0.295679	-3.52513	0.000423279	0.00193253	RNA polymerase beta subunit [Vitis vinifera]	Metabolism.Primary metabolism.Nucleobase, nucleoside, nucleotide, nucleic acid metabolism.Nucleic acid metabolism.RNA metabolism.RNA polymerase
Vitvi04g00932	378.028	2.555	0.345114	7.40334	1.33e-13	4.03e-12	Receptor protein kinase	Signaling.Signaling pathway.Protein kinase	AT1G66150
Vitvi04g00958	43.6024	5.48526	1.14777	4.77908	1.76e-06	1.49e-05	Microtubule-associated protein	Cellular process.Cellular component organization and biogenesis.Cytoskeleton organization and biogenesis.Microtubule organization and biogenesis.Microtubule-driven movement	AT5G37478
Vitvi04g00960	93.5827	4.81359	0.884105	5.44459	5.19e-08	6.09e-07	Microtubule-associated protein	Cellular process.Cellular component organization and biogenesis.Cytoskeleton organization and biogenesis.Microtubule organization and biogenesis.Microtubule-driven movement	AT5G37478
Vitvi04g00965	259.702	1.82317	0.552172	3.30181	0.000960637	0.00392921	Myb KAN1 (KANADI 1)	Regulation overview.Regulation of gene expression.Regulation of transcription.Transcription factor.G2-like family transcription factor	AT5G16560
Vitvi04g01045	2281.05	1.10527	0.309433	3.57192	0.000354373	0.00165537	Unknown protein	Unknown	AT5G18310
Vitvi04g01082	417.793	1.76568	0.516806	3.41652	0.000634274	0.00275316	Violaxanthin de-epoxidase	Metabolism.Secondary metabolism.Terpenoid metabolism.Tetraterpenoid metabolism.Tetraterpenoid biosynthesis.Carotenoid biosynthesis	AT1G08550
Vitvi04g01125	227.209	1.14795	0.336309	3.41338	0.000641629	0.00277869	Unknown	Unknown
Vitvi04g01151	1099.23	-4.44737	0.377177	-11.7912	4.33e-32	1.06e-29	Auxin efflux carrier protein 8	Signaling.Hormone Signaling.Auxin Signaling.Auxin transport	AT5G16530
Vitvi04g01156	2190.13	1.70894	0.288518	5.92319	3.16e-09	4.74e-08	Unknown protein	Unknown	AT1G65295
Vitvi04g01163	63.735	1.26353	0.461447	2.73819	0.0061778	0.0195479	WRKY DNA-binding protein 2	Regulation overview.Regulation of gene expression.Regulation of transcription.Transcription factor.WRKY family transcription factor	AT5G56270
Vitvi04g01174	5917.13	1.31375	0.209362	6.27502	3.5e-10	6.17e-09	Regulator of ribonuclease activity a	Metabolism.Primary metabolism.Nucleobase, nucleoside, nucleotide, nucleic acid metabolism.Nucleic acid metabolism.RNA metabolism	AT5G16450
Vitvi04g01189	280.364	2.27273	0.750184	3.02956	0.00244906	0.00881484	Unknown protein	Unknown	AT1G65230
Vitvi04g01198	8924.84	1.08982	0.173772	6.27156	3.57e-10	6.29e-09	Calreticulin 3 (CRT3)	Signaling.Signaling pathway.Calcium sensors and Signaling	AT1G08450
Vitvi04g01202	1647.81	-1.23312	0.348239	-3.54101	0.000398597	0.001833	DCL2 (DICER 2)	Regulation overview.Regulation of gene expression.Gene silencing.Posttranscriptional gene silencing by RNA.mRNA cleavage involved in gene silencing by miRNA	AT3G03300
Vitvi04g01209	1616.24	1.34953	0.156606	8.61735	6.85e-18	3.56e-16	PRLI-interacting factor G-like protein	Unclear	AT3G50780
Vitvi04g01220	398.002	2.14752	0.349843	6.13852	8.33e-10	1.39e-08	Calmodulin	Signaling.Signaling pathway.Calcium sensors and Signaling	AT3G50770
Vitvi04g01221	11953.8	-2.40826	0.38983	-6.17771	6.5e-10	1.1e-08	PQ-loop repeat protein	Unknown	AT4G36850
Vitvi04g01222	608.782	1.65666	0.475014	3.48761	0.000487356	0.00218624	Galacturonosyltransferase	Cellular process.Cellular component organization and biogenesis.Cell wall organization and biogenesis.Cell wall metabolism.Cell wall biosynthesis.Pectin biosynthesis	AT1G19300
Vitvi04g01224	1676.37	1.56045	0.279513	5.58275	2.37e-08	3.01e-07	GNS1/SUR4 membrane protein	Metabolism.Primary metabolism.Lipid metabolism.Fatty acid metabolism	AT4G36830
Vitvi04g01233	53.5846	3.27223	0.904827	3.61641	0.000298717	0.00142442	Anthocyanidin 3-O-glucosyltransferase	Metabolism.Secondary metabolism.Phenylpropanoid metabolism.Flavonoid metabolism.Flavonoid biosynthesis.Anthocyanin biosynthesis.Anthocyanin-glycoside biosynthesis	AT3G50740
Vitvi04g01243	1879.59	1.03509	0.279447	3.70408	0.000212157	0.0010511	Minor allergen Alt a 7	Response to stimulus.Stress response.Biotic stress response	AT4G36750
Vitvi04g01247	1199.37	1.57597	0.249882	6.30684	2.85e-10	5.1e-09	Scarecrow-like	Regulation overview.Regulation of gene expression.Regulation of transcription.Transcription factor.GRAS family transcription factor	AT4G36710
Vitvi04g01248	42.601	5.01437	0.99929	5.01794	5.22e-07	4.99e-06	Cupin family protein	Metabolism.Primary metabolism.Generation of metabolite precursors and energy.Storage proteins	AT2G18540
Vitvi04g01262	85.1441	5.87689	0.609498	9.64218	5.3e-22	4.38e-20	Ovate family protein 7 OFP7	Development.Reproductive development.Fruit development	AT2G18500
Vitvi04g01267	181.721	2.65762	0.695142	3.82314	0.000131763	0.000693566	Unknown	Unknown
Vitvi04g01274	359.351	6.35417	1.00474	6.32418	2.55e-10	4.59e-09	Membrane protein	Unknown	AT2G25737
Vitvi04g01275	332.945	2.77571	0.416582	6.66307	2.68e-11	5.68e-10	DDM1 (decreased DNA methylation 1)	Regulation overview.Regulation of gene expression.Regulation of transcription.Transcription factor.SNF2 family transcription factor	AT5G66750
Vitvi04g01285	5835.01	-1.17988	0.393875	-2.99557	0.00273932	0.00970994	No hit	No hit
Vitvi04g01287	1588.95	-1.67253	0.332752	-5.02635	5e-07	4.79e-06	SEC14 cytosolic factor, putative	Transport overview.Electrochemical Potential-driven Transporters.Porters.Drug/Metabolite Transporter.Triose-phosphate Transporter	AT1G75170
Vitvi04g01290	170.203	1.19098	0.309321	3.85029	0.000117976	0.000630054	Unknown	Unknown
Vitvi04g01293	159.919	-1.89664	0.301014	-6.30085	2.96e-10	5.29e-09	Phytoene dehydrogenase	Metabolism.Secondary metabolism.Terpenoid metabolism.Tetraterpenoid metabolism.Tetraterpenoid biosynthesis.Carotenoid biosynthesis	AT5G49555
Vitvi04g01296	70.784	-1.49924	0.474052	-3.16261	0.00156364	0.00599288	Maf, septum formation protein	Cellular process.Cell growth and death.Cell division	AT5G66550
Vitvi04g01299	49.4586	5.22565	0.870899	6.00029	1.97e-09	3.09e-08	GATA transcription factor 19	Regulation overview.Regulation of gene expression.Regulation of transcription.Transcription factor.C2C2-GATA family transcription factor	AT3G50870
Vitvi04g01306	213.461	2.6133	0.557942	4.68383	2.82e-06	2.26e-05	Unknown protein	Unknown	AT2G18340
Vitvi04g01309	4.85073	5.53452	1.608	3.44187	0.000577711	0.00253818	Myb family	Regulation overview.Regulation of gene expression.Regulation of transcription.Transcription factor.MYB-related family transcription factor	AT4G39250
Vitvi04g01334	4804.25	1.58135	0.203635	7.76558	8.13e-15	2.9e-13	1,4-beta-mannan endohydrolase	Metabolism.Primary metabolism.Carbohydrate metabolism.Monosaccharide metabolism.Fructose and mannose metabolism	AT5G66460
Vitvi04g01338	254.126	2.34329	0.845779	2.77057	0.00559576	0.0179517	S-adenosyl-L-methionine:carboxyl methyltransferase	Unclear	AT4G36470
Vitvi04g01357	88.3161	1.32199	0.552082	2.39456	0.0166405	0.0447706	AAA-type ATPase	Diverse functions.Gene family with diverse functions.AAA-type ATPase domain family	AT2G18193
Vitvi04g01359	329.338	1.00209	0.239659	4.1813	2.9e-05	0.000181644	Thioredoxin domain-containing protein 9	Cellular process.Cellular homeostasis.Cell redox homeostasis	AT5G66410
Vitvi04g01366	13259.6	1.00538	0.244463	4.11262	3.91e-05	0.000237868	Papain cysteine proteinase	Metabolism.Primary metabolism.Protein metabolism and modification.Proteolysis.Peptidase-mediated proteolysis	AT4G39090
Vitvi04g01368	324598	-4.04671	0.599193	-6.75359	1.44e-11	3.17e-10	Dehydrin 1b	Response to stimulus.Stress response.Abiotic stress response.Desiccation stress response
Vitvi04g01370	1323.99	-1.03765	0.175297	-5.9194	3.23e-09	4.83e-08	Unknown protein	Unknown	AT5G49410
Vitvi04g01371	87.0428	-1.32706	0.354011	-3.74865	0.000177788	0.000899354	Glycosyl transferase family 1 protein	Metabolism.Primary metabolism.Carbohydrate metabolism.Glycosyl transference	AT1G75420
Vitvi04g01379	8.46902	2.6837	0.969624	2.76777	0.00564407	0.0180901	No hit	No hit
Vitvi04g01400	62.7531	1.52094	0.511361	2.9743	0.00293659	0.0103035	Dehydration-responsive protein	Response to stimulus.Stress response.Abiotic stress response.Drought stress response	AT3G51070
Vitvi04g01410	829.843	1.00499	0.19836	5.06651	4.05e-07	3.95e-06	GATA transcription factor 14	Regulation overview.Regulation of gene expression.Regulation of transcription.Transcription factor.C2C2-GATA family transcription factor	AT5G66320
Vitvi04g01420	804.405	-1.00778	0.178924	-5.63243	1.78e-08	2.31e-07	Cell growth defect factor 1	Cellular process.Cell growth and death.Cell death	AT3G51140
Vitvi04g01421	1980.37	1.47707	0.51251	2.88203	0.00395125	0.0133278	fructose-bisphosphate aldolase, chloroplast precursor	Metabolism.Primary metabolism.Carbohydrate metabolism.Glycolysis Gluconeogenesis	AT4G38970
Vitvi04g01424	1526.37	5.64921	0.554919	10.1802	2.43e-24	2.66e-22	Lactoylglutathione lyase	Metabolism.Primary metabolism.Carbohydrate metabolism.Monosaccharide metabolism.Pyruvate metabolism	AT1G80160
Vitvi04g01425	166.435	1.97826	0.344296	5.7458	9.15e-09	1.26e-07	Kinesin motor protein	Cellular process.Cellular component organization and biogenesis.Cytoskeleton organization and biogenesis.Microtubule organization and biogenesis.Microtubule-driven movement	AT3G51150
Vitvi04g01426	177.003	2.92304	0.400665	7.29547	2.98e-13	8.59e-12	Leucine-rich repeat family protein / extensin	Cellular process.Cellular component organization and biogenesis.Cell wall organization and biogenesis.Cell wall structural protein	AT4G36180
Vitvi04g01440	58.0796	2.5596	0.723914	3.53578	0.000406575	0.00186444	Myosin-related	Cellular process.Cellular component organization and biogenesis.Cytoskeleton organization and biogenesis	AT1G19835
Vitvi04g01441	277.895	2.51043	0.612384	4.09945	4.14e-05	0.000250085	Auxin-responsive SAUR9	Signaling.Hormone Signaling.Auxin Signaling.Auxin-mediated Signaling pathway	AT4G34760
Vitvi04g01444	2.8511	4.7634	1.78417	2.66981	0.00758938	0.0232236	Cellulase2	Cellular process.Cellular component organization and biogenesis.Cell wall organization and biogenesis	AT1G19940
Vitvi04g01453	411.488	5.4057	0.576879	9.37059	7.21e-21	5.32e-19	Unknown protein	Unknown	AT5G66230
Vitvi04g01454	10776	1.51974	0.290288	5.23528	1.65e-07	1.76e-06	Flavonone- 3-hydroxylase	Metabolism.Secondary metabolism.Phenylpropanoid metabolism.Flavonoid metabolism.Flavonoid biosynthesis	AT3G51240
Vitvi04g01470	820.334	1.38626	0.241547	5.73912	9.52e-09	1.3e-07	Thaumatin SCUTL1	Response to stimulus.Stress response	AT4G36010
Vitvi04g01471	2701.24	1.75631	0.3079	5.70418	1.17e-08	1.58e-07	Thaumatin	Response to stimulus.Stress response	AT4G38660
Vitvi04g01475	110.672	3.25173	0.999801	3.25238	0.00114442	0.00456921	MLO4 (mildew resistance locus O 4)	Cellular process.Cell growth and death.Cell death	AT1G11000
Vitvi04g01481	1459.68	1.61142	0.404914	3.97967	6.9e-05	0.000391395	Galactose mutarotase-like	Metabolism.Primary metabolism.Carbohydrate metabolism.Glycolysis Gluconeogenesis	AT5G66150
Vitvi04g01486	94.3658	1.43868	0.397262	3.62149	0.000292913	0.00139865	Myb domain protein 4	Regulation overview.Regulation of gene expression.Regulation of transcription.Transcription factor.MYB family transcription factor	AT4G38620
Vitvi04g01500	10048.7	-1.28906	0.307922	-4.18631	2.84e-05	0.000178324	Unknown	Unknown
Vitvi04g01503	7127.04	-1.22384	0.207572	-5.89595	3.73e-09	5.51e-08	Unknown protein	Unknown	AT4G35920
Vitvi04g01519	121.77	-1.22799	0.386183	-3.17983	0.00147364	0.00570095	F-box family protein	Metabolism.Primary metabolism.Protein metabolism and modification.Proteolysis.cytoplasmic and nuclear protein degradation.Ubiquitin-mediated proteolysis	AT2G17030
Vitvi04g01520	1332.35	1.12528	0.182792	6.15606	7.46e-10	1.25e-08	Cellular retinaldehyde-binding/triple function, C-terminal	Unknown	AT4G35750
Vitvi04g01530	5813.78	-1.34353	0.193896	-6.92909	4.24e-12	1.02e-10	Phospholipase D delta isoform 1b	Metabolism.Primary metabolism.Lipid metabolism.Glycerolipid metabolism.Glycerophospholipid metabolism.Glycerophospholipid catabolism	AT4G35790
Vitvi04g01532	399.138	-1.48359	0.480365	-3.08847	0.00201191	0.00745695	Phospholipase D delta isoform 1b	Metabolism.Primary metabolism.Lipid metabolism.Glycerolipid metabolism.Glycerophospholipid metabolism.Glycerophospholipid catabolism	AT4G35790
Vitvi04g01550	419.683	2.67157	0.662281	4.0339	5.49e-05	0.000319326	Strictosidine synthase	Metabolism.Secondary metabolism.Terpenoid metabolism.Terpenoid biosynthesis	AT3G51430
Vitvi04g01551	160.202	1.05077	0.353494	2.97252	0.00295364	0.0103544	AMP-dependent synthetase and ligase	Unclear	AT2G17650
Vitvi04g01556	803.622	1.29455	0.240882	5.37421	7.69e-08	8.75e-07	Squamosa promoter-binding protein 12 (SPL12)	Regulation overview.Regulation of gene expression.Regulation of transcription.Transcription factor.SBP family transcription factor	AT3G60030
Vitvi04g01564	3185.57	1.79307	0.365376	4.90746	9.23e-07	8.37e-06	Catalase [Vitis vinifera]	Metabolism.Cellular metabolism.Methane metabolism	AT4G35090
Vitvi04g01598	13.7913	-7.44398	1.50695	-4.93978	7.82e-07	7.21e-06	Nodulin MtN21 family	Transport overview.Electrochemical Potential-driven Transporters.Porters.Drug/Metabolite Transporter.Plant Drug/Metabolite Exporter	AT1G68170
Vitvi04g01599	54.3308	-2.51807	0.531044	-4.74173	2.12e-06	1.75e-05	Nodulin MtN21 family	Transport overview.Electrochemical Potential-driven Transporters.Porters.Drug/Metabolite Transporter.Plant Drug/Metabolite Exporter	AT1G68170
Vitvi04g01600	9.38595	-6.89131	1.61167	-4.27588	1.9e-05	0.000125131	Nodulin MtN21 family	Transport overview.Electrochemical Potential-driven Transporters.Porters.Drug/Metabolite Transporter.Plant Drug/Metabolite Exporter
Vitvi04g01604	3284.24	1.39335	0.238645	5.83859	5.26e-09	7.6e-08	GT2-like trihelix DNA-binding protein	Regulation overview.Regulation of gene expression.Regulation of transcription.Transcription factor.Trihelix family transcription factor	AT1G76880
Vitvi04g01608	154.526	1.8118	0.545468	3.32155	0.000895191	0.00369355	PAP/fibrillin family	Cellular process	AT5G09820
Vitvi04g01616	141.15	2.41251	0.548204	4.40076	1.08e-05	7.56e-05	Zinc finger (C3HC4-type ring finger) family protein	Regulation overview.Regulation of gene expression.Regulation of transcription.Transcription factor.Zinc finger C3HC4 family transcription factor	AT1G49230
Vitvi04g01635	45.9438	3.38483	0.878164	3.85443	0.000115997	0.000621787	S-receptor kinase	Signaling.Signaling pathway.Protein kinase	AT5G60900
Vitvi04g01641	84.628	1.81204	0.346232	5.2336	1.66e-07	1.77e-06	Protein BRUSHY 1 (Protein TONSOKU) (Protein MGOUN 3)	Development.Meristem organization and activity	AT3G18730
Vitvi04g01643	13.5452	2.69651	0.951658	2.83348	0.00460441	0.0151864	WD40	Unknown	AT5G24320
Vitvi04g01648	140.21	1.06932	0.306156	3.49274	0.0004781	0.00214897	No hit	No hit
Vitvi04g01650	560.895	-2.03735	0.325736	-6.25459	3.99e-10	6.96e-09	Ankyrin	Diverse functions.Gene family with diverse functions.Ankyrin domain family	AT3G18670
Vitvi04g01657	64.671	2.23917	0.657224	3.40701	0.000656798	0.00283737	PGSIP1 (Plant glycogenin-like starch initiation protein 1)	Unclear	AT3G18660
Vitvi04g01666	212.657	3.2486	0.623503	5.21023	1.89e-07	1.97e-06	Invertase/pectin methylesterase inhibitor	Cellular process.Cellular component organization and biogenesis.Cell wall organization and biogenesis	AT5G64620
Vitvi04g01685	411.422	-3.25665	0.442136	-7.36573	1.76e-13	5.22e-12	Unknown	Unknown
Vitvi04g01697	1441.47	-1.33157	0.48774	-2.73009	0.0063317	0.0199628	Myb domain protein 52	Regulation overview.Regulation of gene expression.Regulation of transcription.Transcription factor.MYB family transcription factor	AT1G73410
Vitvi04g01700	3892.09	1.66558	0.415949	4.00428	6.22e-05	0.000356425	Photosystem I reaction center subunit N (PSAN)	Metabolism.Primary metabolism.Generation of metabolite precursors and energy.Photosynthesis.Photosystem I	AT5G64040
Vitvi04g01706	218.705	2.45815	0.428464	5.73711	9.63e-09	1.32e-07	PUB26 (plant U- box 26)	Cellular process.Cell growth and death.Cell death
Vitvi04g01714	1149.87	2.09121	0.322751	6.47933	9.21e-11	1.77e-09	NAC domain containing protein 104	Regulation overview.Regulation of gene expression.Regulation of transcription.Transcription factor.NAC family transcription factor	AT5G64530
Vitvi04g01727	27.2702	1.41206	0.559846	2.52224	0.011661	0.0332597	CYP82C1p	Metabolism.Cellular metabolism.Oxidation reduction.Cytochrome P450 oxidoreductase	AT4G31940
Vitvi04g01737	23.2041	2.75291	1.04638	2.63089	0.00851621	0.0256155	MORC family CW-type zinc finger 3	Unknown	AT4G24970
Vitvi04g01747	159.318	-1.25643	0.446498	-2.81395	0.00489365	0.015975	Auxin efflux carrier	Signaling.Hormone Signaling.Auxin Signaling.Auxin transport	AT1G20925
Vitvi04g01754	676.066	1.70937	0.354177	4.82631	1.39e-06	1.2e-05	Subtilisin protease precursor	Transport overview.Channels and pores.√ü-Barrel porins.Autotransporter	AT1G32940
Vitvi04g01756	1222.93	1.19111	0.174644	6.82022	9.09e-12	2.07e-10	Lectin protein kinase	Signaling.Signaling pathway.Protein kinase	AT5G06740
Vitvi04g01787	643.14	-1.41173	0.196229	-7.19429	6.28e-13	1.71e-11	Unknown	Unknown
Vitvi04g01788	1364.17	-1.04153	0.256529	-4.06008	4.91e-05	0.000289116	Glutaredoxin	Response to stimulus.Stress response.Abiotic stress response.Oxidative stress response	AT4G33040
Vitvi04g01795	101.037	1.85631	0.558473	3.3239	0.000887678	0.00366934	Heat shock protein 17.6 kDa class II	Metabolism.Primary metabolism.Protein metabolism and modification.Protein folding.Chaperone-mediated protein folding.HSP-mediated protein folding	AT5G12020
Vitvi04g01799	30.8065	2.87884	0.716637	4.01715	5.89e-05	0.000339653	Small molecular heat shock protein 17.5	Metabolism.Primary metabolism.Protein metabolism and modification.Protein folding.Chaperone-mediated protein folding.HSP-mediated protein folding	AT5G12020
Vitvi04g01800	6.6789	5.49523	1.27678	4.30399	1.68e-05	0.000111722	Small molecular heat shock protein 17.5	Metabolism.Primary metabolism.Protein metabolism and modification.Protein folding.Chaperone-mediated protein folding.HSP-mediated protein folding	AT5G12020
Vitvi04g01801	28.4363	3.05297	0.63749	4.78904	1.68e-06	1.42e-05	Heat shock protein 17.6 kDa class II	Metabolism.Primary metabolism.Protein metabolism and modification.Protein folding.Chaperone-mediated protein folding.HSP-mediated protein folding	AT5G12020
Vitvi04g01806	1619.11	2.05084	0.449958	4.55784	5.17e-06	3.89e-05	PSBX (photosystem II subunit X)	Metabolism.Primary metabolism.Generation of metabolite precursors and energy.Photosynthesis.Photosystem II
Vitvi04g01814	1832.67	-1.14029	0.248279	-4.59279	4.37e-06	3.37e-05	No hit	No hit
Vitvi04g01823	25.661	-2.52345	0.576068	-4.38047	1.18e-05	8.2e-05	No hit	No hit
Vitvi04g01828	36.3614	5.77187	0.857393	6.73188	1.67e-11	3.63e-10	ELM2 domain-containing protein	Regulation overview.Regulation of gene expression.Regulation of transcription.Transcription factor.PHD family transcription factor	AT2G19260
Vitvi04g01829	36.7	4.9562	1.1084	4.47148	7.77e-06	5.65e-05	No hit	No hit
Vitvi04g01834	230.857	-1.06263	0.350504	-3.03173	0.00243159	0.00876739	RNA recognition motif (RRM)-containing	Unknown	AT2G24350
Vitvi04g01838	158.127	1.62668	0.37002	4.39619	1.1e-05	7.7e-05	SWIM zinc finger family (MAPKKK)	Signaling.Signaling pathway.Protein kinase	AT5G11620
Vitvi04g01849	34.1615	4.24983	0.923288	4.60293	4.17e-06	3.22e-05	Lactoylglutathione lyase	Metabolism.Primary metabolism.Carbohydrate metabolism.Monosaccharide metabolism.Pyruvate metabolism	AT1G67280
Vitvi04g01855	1142.21	2.39064	0.180853	13.2187	6.84e-40	2.95e-37	Myb-related protein 3R-1 (Plant c-MYB-like protein 1) MYB3R1	Cellular process.Cell growth and death	AT4G32730
Vitvi04g01856	345.197	1.32564	0.372292	3.56075	0.000369799	0.00171731	Ankyrin repeat	Transport overview.Accessory factors involved in transport.Auxiliary transport proteins.Ankyrin	AT1G10340
Vitvi04g01858	10672	-1.03621	0.180169	-5.75133	8.85e-09	1.22e-07	Ribosomal protein L37 (RPL37C) 60S	Metabolism.Primary metabolism.Protein metabolism and modification.Protein synthesis.Ribosome	AT3G16080
Vitvi04g01866	45.0555	8.74994	2.58355	3.38679	0.000707148	0.00302084	RD22 [Vitis vinifera]	Response to stimulus.Stress response.Abiotic stress response.Drought stress response	AT5G25610
Vitvi04g01873	1425.4	1.69122	0.238387	7.09444	1.3e-12	3.41e-11	RD22	Response to stimulus.Stress response.Abiotic stress response.Drought stress response	AT5G25610
Vitvi04g01888	298.247	4.51574	1.27943	3.52948	0.000416371	0.00190509	Unknown	Unknown	ATCG00480
Vitvi04g01894	124.674	7.81514	0.747929	10.449	1.48e-25	1.81e-23	Zinc finger (Ran-binding)	Regulation overview.Regulation of gene expression.Regulation of transcription.Transcription factor.Other zinc finger family transcription factor	AT3G15680
Vitvi04g01897	26.2986	4.89274	1.03901	4.70903	2.49e-06	2.03e-05	Unknown protein	Unknown	AT4G31980
Vitvi04g01898	3.29256	3.9304	1.25254	3.13795	0.00170135	0.00645414	No hit	No hit
Vitvi04g01906	172.931	1.76055	0.484517	3.63362	0.00027947	0.00134283	Serine hydrolase [Vitis vinifera]	Metabolism.Primary metabolism.Amino acid metabolism.Glycine, serine, and threonine metabolism	AT5G16080
Vitvi04g01907	113.864	-2.9604	0.919766	-3.21865	0.00128796	0.00506855	Carboxyesterase17 CXE17	Metabolism.Cellular metabolism.Esterase activity	AT5G16080
Vitvi04g01908	169.641	1.57739	0.287427	5.48798	4.07e-08	4.91e-07	Serine hydrolase [Vitis vinifera]	Metabolism.Primary metabolism.Amino acid metabolism.Glycine, serine, and threonine metabolism	AT5G16080
Vitvi04g01909	475.84	2.22567	0.373496	5.95902	2.54e-09	3.89e-08	Serine hydrolase [Vitis vinifera]	Metabolism.Primary metabolism.Amino acid metabolism.Glycine, serine, and threonine metabolism	AT5G16080
Vitvi04g01918	107.663	1.43541	0.587679	2.44251	0.0145855	0.04005	No hit	No hit
Vitvi04g01920	204.346	1.25406	0.528536	2.37271	0.0176579	0.0470897	No hit	No hit
Vitvi04g01934	12311	4.21889	0.530795	7.94825	1.89e-15	7.38e-14	Aspartic proteinase nepenthesin-2 precursor	Metabolism.Primary metabolism.Protein metabolism and modification.Proteolysis.Peptidase-mediated proteolysis	AT5G10770
Vitvi04g01935	99.663	4.01535	0.553406	7.2557	4e-13	1.13e-11	Chloroplast nucleoid DNA binding protein	Metabolism.Primary metabolism.Nucleobase, nucleoside, nucleotide, nucleic acid metabolism.Nucleic acid metabolism.DNA metabolism	AT5G10770
Vitvi04g01936	53.0444	3.82942	0.868027	4.41164	1.03e-05	7.23e-05	Chloroplast nucleoid DNA binding protein	Metabolism.Primary metabolism.Nucleobase, nucleoside, nucleotide, nucleic acid metabolism.Nucleic acid metabolism.DNA metabolism	AT5G10770
Vitvi04g01937	227.317	4.238	0.424887	9.97441	1.97e-23	1.88e-21	Chloroplast nucleoid DNA binding protein	Metabolism.Primary metabolism.Nucleobase, nucleoside, nucleotide, nucleic acid metabolism.Nucleic acid metabolism.DNA metabolism	AT5G10770
Vitvi04g01940	163.07	2.56718	0.86914	2.9537	0.00313987	0.0109261	No hit	No hit
Vitvi04g01941	97.4352	5.29886	0.898795	5.89551	3.74e-09	5.52e-08	Aspartyl protease	Metabolism.Primary metabolism.Protein metabolism and modification.Proteolysis.Peptidase-mediated proteolysis
Vitvi04g01968	56.1459	6.16122	1.32588	4.64688	3.37e-06	2.66e-05	Glutamate receptor protein	Transport overview.Channels and pores.a-Type channels.Glutamate-gated Ion Channel of Neurotransmitter Receptors	AT2G29120
Vitvi04g02010	460.193	1.63082	0.404215	4.03454	5.47e-05	0.000318605	Unknown	Unknown
Vitvi04g02017	838.079	1.45401	0.316843	4.58906	4.45e-06	3.41e-05	Cold induced protein	Response to stimulus.Stress response.Abiotic stress response.Temperature stress response.Cold stress response
Vitvi04g02054	43.2775	4.00097	0.861226	4.64567	3.39e-06	2.68e-05	Ankyrin	Transport overview.Accessory factors involved in transport.Auxiliary transport proteins.Ankyrin
Vitvi04g02062	298.638	1.72552	0.328617	5.25085	1.51e-07	1.63e-06	RIC4 (ROP-Interactive crib motif-containing protein 4)	Cellular process.Cellular component organization and biogenesis.Cytoskeleton organization and biogenesis	AT5G16490
Vitvi04g02063	5300.06	1.49887	0.351939	4.25889	2.05e-05	0.000133915	Photosystem I subunit XI (PSAL)	Metabolism.Primary metabolism.Generation of metabolite precursors and energy.Photosynthesis.Photosystem I	AT4G12800
Vitvi04g02085	170.978	-1.11375	0.30611	-3.6384	0.000274341	0.00132154	Unknown	Unknown
Vitvi04g02094	371.613	-2.5173	0.403043	-6.24572	4.22e-10	7.34e-09	Unknown	Unknown
Vitvi04g02102	12.5899	6.91092	1.36193	5.07437	3.89e-07	3.81e-06	No hit	No hit
Vitvi04g02114	322.766	5.35919	2.2293	2.40397	0.0162179	0.0438019	SAM dependent carboxyl methyltransferase Methyltransf_7	Unclear	AT5G04370
Vitvi04g02117	1467.09	8.11747	1.27324	6.37543	1.82e-10	3.37e-09	S-adenosyl-L-methionine:salicylic acid carboxyl methyltransferase	Metabolism.Primary metabolism.Amino acid metabolism.Aromatic amino acid metabolism.Phenylalanine metabolism.Phenylalanine biosynthesis	AT1G19640
Vitvi04g02118	2909.92	9.69931	1.27003	7.63708	2.22e-14	7.51e-13	S-adenosyl-L-methionine:salicylic acid carboxyl methyltransferase	Metabolism.Primary metabolism.Amino acid metabolism.Aromatic amino acid metabolism.Phenylalanine metabolism.Phenylalanine biosynthesis	AT1G19640
Vitvi04g02120	1123.04	9.47778	1.34517	7.04577	1.84e-12	4.72e-11	S-adenosyl-L-methionine:salicylic acid carboxyl methyltransferase	Metabolism.Primary metabolism.Amino acid metabolism.Aromatic amino acid metabolism.Phenylalanine metabolism.Phenylalanine biosynthesis	AT3G11480
Vitvi04g02121	340.106	11.6664	1.3518	8.63025	6.12e-18	3.21e-16	S-adenosyl-L-methionine:salicylic acid carboxyl methyltransferase	Metabolism.Primary metabolism.Amino acid metabolism.Aromatic amino acid metabolism.Phenylalanine metabolism.Phenylalanine biosynthesis	AT3G11480
Vitvi04g02122	43.1963	8.68953	1.46532	5.9301	3.03e-09	4.55e-08	S-adenosyl-L-methionine:salicylic acid carboxyl methyltransferase	Metabolism.Primary metabolism.Amino acid metabolism.Aromatic amino acid metabolism.Phenylalanine metabolism.Phenylalanine biosynthesis	AT3G11480
Vitvi04g02123	144.385	9.94848	1.08274	9.18821	3.99e-20	2.66e-18	S-adenosyl-L-methionine:salicylic acid carboxyl methyltransferase	Metabolism.Primary metabolism.Amino acid metabolism.Aromatic amino acid metabolism.Phenylalanine metabolism.Phenylalanine biosynthesis	AT1G19640
Vitvi04g02125	25.2722	3.61668	1.48019	2.44338	0.0145502	0.0399756	S-adenosyl-L-methionine:salicylic acid methyltransferase	Metabolism.Primary metabolism.Amino acid metabolism.Aromatic amino acid metabolism.Phenylalanine metabolism.Phenylalanine biosynthesis
Vitvi04g02126	4.18596	5.32241	1.70453	3.12252	0.00179313	0.00675441	Jasmonate O-methyltransferase	Metabolism.Primary metabolism.Lipid metabolism.Fatty acid metabolism.Alpha-linolenic acid metabolism
Vitvi04g02131	68.2863	-1.23546	0.393116	-3.14273	0.00167378	0.00636627	Peroxisomal biogenesis factor 11 (PEX11C)	Cellular process.Cellular component organization and biogenesis.Organelle organization and biogenesis.Peroxisome organization and biogenesis	AT1G01820
Vitvi04g02150	19.4788	7.54017	1.16221	6.48777	8.71e-11	1.68e-09	Unknown protein	Unknown	AT2G17940
Vitvi04g02157	265.989	1.71378	0.615423	2.78472	0.00535747	0.017289	Oligopeptide transporter 7 ATOPT7	Transport overview.Electrochemical Potential-driven Transporters.Porters.Oligopeptide Transporter	AT4G10770
Vitvi04g02163	113.61	4.89061	0.552659	8.84922	8.81e-19	5.1e-17	Tetratricopeptide repeat domain male sterility MS5	Unknown	AT3G51280
Vitvi04g02165	54.3475	5.47883	0.710233	7.71413	1.22e-14	4.28e-13	Tetratricopeptide repeat domain male sterility MS5	Unknown	AT3G51280
Vitvi04g02166	262.727	2.20609	0.425463	5.18515	2.16e-07	2.24e-06	Ascorbate peroxidase	Metabolism.Primary metabolism.Organic acid metabolism.Ascorbate and aldarate metabolism	AT4G35000
Vitvi04g02174	9.92428	6.56635	1.35284	4.85376	1.21e-06	1.07e-05	Zinc finger (C3HC4-type ring finger)	Regulation overview.Regulation of gene expression.Regulation of transcription.Transcription factor.Zinc finger C3HC4 family transcription factor
Vitvi04g02188	97.2102	3.14126	0.835419	3.7601	0.000169848	0.000864537	Peroxidase 64	Metabolism.Primary metabolism.Amino acid metabolism.Aromatic amino acid metabolism.Phenylalanine metabolism.Phenylalanine biosynthesis	AT5G42180
Vitvi04g02192	188.048	1.34854	0.495782	2.72002	0.00652787	0.0204734	Mucin-like protein	Cellular process	AT3G51430
Vitvi04g02197	115.976	1.51256	0.364689	4.14754	3.36e-05	0.000207484	Strictosidine synthase	Metabolism.Secondary metabolism.Terpenoid metabolism.Terpenoid biosynthesis	AT3G51430
Vitvi04g02211	313.166	7.9686	0.651861	12.2244	2.3e-34	6.65e-32	No hit	No hit
Vitvi04g02223	412.472	6.32771	1.36634	4.63113	3.64e-06	2.85e-05	Histone H3	Cellular process.Cellular component organization and biogenesis.Nucleus.Chromosome organization and biogenesis.Chromatin assembly	AT5G65360
Vitvi04g02232	393.34	2.56254	0.408425	6.27421	3.51e-10	6.2e-09	S-receptor kinase	Signaling.Signaling pathway.Protein kinase	AT5G60900
Vitvi04g02252	91.928	1.67773	0.615041	2.72783	0.00637522	0.0200742	Unknown	Unknown
Vitvi04g02255	32.5809	-1.36213	0.505016	-2.69721	0.00699232	0.0217355	No hit	No hit
Vitvi04g02265	8.85994	-6.80541	1.45171	-4.68786	2.76e-06	2.23e-05	No hit	No hit
Vitvi04g02274	11199	1.69554	0.330849	5.1248	2.98e-07	3e-06	Catalase	Metabolism.Cellular metabolism.Methane metabolism
Vitvi04g02275	96.0899	1.72135	0.452806	3.80151	0.000143818	0.000748505	Aspartyl protease	Metabolism.Primary metabolism.Protein metabolism and modification.Proteolysis.Peptidase-mediated proteolysis	AT2G17760
Vitvi04g02290	89.0749	-1.06997	0.278958	-3.83559	0.000125262	0.000664769	No hit	No hit
Vitvi04g02295	80.5981	2.93279	0.554881	5.28544	1.25e-07	1.37e-06	LYS/HIS transporter 7 LHT7	Transport overview.Electrochemical Potential-driven Transporters.Porters.Amino Acid/Auxin Permease	AT1G47670
Vitvi04g02306	464.549	2.01371	0.367667	5.47699	4.33e-08	5.16e-07	Peroxidase 64	Metabolism.Primary metabolism.Amino acid metabolism.Aromatic amino acid metabolism.Phenylalanine metabolism.Phenylalanine biosynthesis	AT5G42180
Vitvi04g02318	86.0102	3.50945	0.620021	5.66022	1.51e-08	2e-07	F-box family protein	Metabolism.Primary metabolism.Protein metabolism and modification.Proteolysis.cytoplasmic and nuclear protein degradation.Ubiquitin-mediated proteolysis
Vitvi05g00006	517.908	4.73197	0.971485	4.87087	1.11e-06	9.89e-06	Transducin protein	Unclear	AT3G06880
Vitvi05g00009	66.8311	-5.37348	0.718218	-7.48168	7.34e-14	2.32e-12	UDP-glucuronic acid decarboxylase 2	Metabolism.Primary metabolism.Carbohydrate metabolism.Polysaccharide metabolism.Starch and sucrose metabolism	AT3G62830
Vitvi05g00012	637.896	1.48648	0.376402	3.94918	7.84e-05	0.00043867	Unknown protein	Unknown	AT5G49100
Vitvi05g00013	1676.93	3.29758	0.460656	7.15844	8.16e-13	2.19e-11	Nodulin MtN3 family	Development.Root development	AT4G15920
Vitvi05g00018	914.207	-1.79935	0.311516	-5.7761	7.64e-09	1.07e-07	Chalcone reductase	Metabolism.Secondary metabolism.Phenylpropanoid metabolism.Flavonoid metabolism.Flavonoid biosynthesis	AT1G59960
Vitvi05g00026	76.1477	2.02602	0.402006	5.03978	4.66e-07	4.49e-06	Unknown protein	Unknown	AT5G49110
Vitvi05g00028	2675.92	-2.68256	0.435293	-6.16266	7.15e-10	1.2e-08	Senescence-associated protein	Unknown	AT5G49120
Vitvi05g00034	71.476	-1.16702	0.274596	-4.24995	2.14e-05	0.000138567	Gamete expressed2 (GEX2)	Development.Reproductive development.Pollination-related	AT5G49150
Vitvi05g00039	18.9521	2.9557	1.01339	2.91666	0.00353802	0.012119	Epoxide hydrolase	Metabolism.Cellular metabolism.Epoxide hydrolase family	AT4G02340
Vitvi05g00042	65.3054	2.43376	0.530192	4.59033	4.43e-06	3.39e-05	Chromosoma associate protein subunit H2	Metabolism.Primary metabolism.Nucleobase, nucleoside, nucleotide, nucleic acid metabolism.Nucleic acid metabolism.DNA metabolism.DNA recombination and repair.repair	AT3G16730
Vitvi05g00047	19.6929	-2.14717	0.738724	-2.9066	0.00365386	0.0124601	Polygalacturonase GH28	Cellular process.Cellular component organization and biogenesis.Cell wall organization and biogenesis.Cell wall metabolism.Cell wall modification.Pectin modification	AT4G18180
Vitvi05g00062	220.761	2.53933	0.339101	7.48842	6.97e-14	2.21e-12	SAG101 (senescence-associated gene 101)	Metabolism.Primary metabolism.Lipid metabolism.Glycerolipid metabolism.Glycerolipid catabolism	AT5G14930
Vitvi05g00080	202.669	-1.64146	0.321332	-5.1083	3.25e-07	3.24e-06	No hit	No hit
Vitvi05g00083	195.54	4.422	0.783986	5.64041	1.7e-08	2.22e-07	Unknown protein	Unknown	AT5G26910
Vitvi05g00094	1532.28	1.87674	0.286325	6.55459	5.58e-11	1.12e-09	Endochitinase A2 precursor	Metabolism.Primary metabolism.Carbohydrate metabolism.Monosaccharide metabolism.Amino sugar metabolism	AT3G16920
Vitvi05g00107	10500.6	-1.76811	0.433854	-4.07536	4.59e-05	0.0002734	Beta-1,3-glucanase	Metabolism.Primary metabolism.Carbohydrate metabolism.Polysaccharide metabolism.Beta-1,3 glucan metabolism.Beta-1,3 glucan catabolism	AT3G57240
Vitvi05g00116	64.7186	6.06702	0.915838	6.62455	3.48e-11	7.25e-10	Chloroplast RF68	Unknown
Vitvi05g00117	1009.24	1.35176	0.166553	8.1161	4.81e-16	2.03e-14	Betaine-aldehyde dehydrogenase	Metabolism.Primary metabolism.Amino acid metabolism.Glycine, serine, and threonine metabolism	AT3G66658
Vitvi05g00118	45.3302	2.44313	0.74235	3.29107	0.000998058	0.00406694	Unknown protein	Unknown	AT3G17030
Vitvi05g00124	845.224	1.8628	0.34395	5.4159	6.1e-08	7.06e-07	HCF107 (high chlorophyll fluorescent 107)	Metabolism.Primary metabolism.Nucleobase, nucleoside, nucleotide, nucleic acid metabolism.Nucleic acid metabolism.RNA metabolism.RNA processing.mRNA processing.mRNA splicing	AT3G17040
Vitvi05g00145	2292.51	1.62603	0.364672	4.45889	8.24e-06	5.95e-05	WRKY DNA-binding protein 48	Regulation overview.Regulation of gene expression.Regulation of transcription.Transcription factor.WRKY family transcription factor	AT5G49520
Vitvi05g00150	5649.2	-1.09515	0.206819	-5.2952	1.19e-07	1.31e-06	Unknown protein	Unknown	AT4G01960
Vitvi05g00156	145.933	-1.23383	0.301281	-4.09527	4.22e-05	0.000253779	Pentatricopeptide (PPR) repeat-containing protein	Diverse functions.Gene family with diverse functions.Pentatricopeptide domain family	AT3G48810
Vitvi05g00194	1664.98	-1.23605	0.410721	-3.00946	0.00261714	0.00933658	Integrase, catalytic region	Transposable elements viral and plasmid proteins.Protein from transposable element
Vitvi05g00212	685.623	6.25754	0.72766	8.59954	8e-18	4.12e-16	Polygalacturonase GH28	Cellular process.Cellular component organization and biogenesis.Cell wall organization and biogenesis.Cell wall metabolism.Cell wall modification.Pectin modification	AT1G48100
Vitvi05g00214	1909.74	3.03597	0.55555	5.4648	4.63e-08	5.5e-07	Boron transporter-like protein 1	Transport overview.Electrochemical Potential-driven Transporters.Porters.Anion Exchanger	AT3G62270
Vitvi05g00235	3042.67	-2.8297	0.408882	-6.92059	4.5e-12	1.08e-10	1-cys peroxiredoxin	Metabolism.Primary metabolism.Amino acid metabolism.Aromatic amino acid metabolism.Phenylalanine metabolism.Phenylalanine biosynthesis	AT1G48130
Vitvi05g00236	529.909	6.41774	0.910063	7.05198	1.76e-12	4.53e-11	Unknown protein	Unknown	AT3G17350
Vitvi05g00237	125.859	2.52891	0.482515	5.2411	1.6e-07	1.71e-06	Kinesin phragmoplast orienting kinesin 1	Cellular process.Cellular component organization and biogenesis.Cytoskeleton organization and biogenesis.Microtubule organization and biogenesis.Microtubule-driven movement	AT3G17360
Vitvi05g00243	1522.55	2.30203	0.340364	6.76345	1.35e-11	2.99e-10	ABC transporter G member 21	Transport overview.Macromolecule transport.Multidrug transport.Multidrug ABC transport	AT3G53480
Vitvi05g00256	1925.68	1.93134	0.395489	4.88343	1.04e-06	9.34e-06	CBL-interacting protein kinase 1 (CIPK1)	Signaling.Signaling pathway.Protein kinase	AT3G17510
Vitvi05g00266	185.539	10.7922	1.00819	10.7044	9.7e-27	1.38e-24	Aspartyl protease	Metabolism.Primary metabolism.Protein metabolism and modification.Proteolysis.Peptidase-mediated proteolysis	AT1G11910
Vitvi05g00271	67.3381	2.48664	0.915634	2.71576	0.0066123	0.0207117	IAA31	Signaling.Hormone Signaling.Auxin Signaling.Auxin-mediated Signaling pathway	AT3G17600
Vitvi05g00272	166.537	4.29891	0.338371	12.7047	5.57e-37	2.01e-34	Unknown	Unknown
Vitvi05g00275	1966.69	-3.60476	0.362996	-9.93059	3.06e-23	2.87e-21	Myb domain protein 61	Regulation overview.Regulation of gene expression.Regulation of transcription.Transcription factor.MYB family transcription factor	AT1G09540
Vitvi05g00281	76.5413	3.39745	0.366121	9.27959	1.7e-20	1.19e-18	Binding	Unknown	AT4G15890
Vitvi05g00284	145170	-1.0422	0.19578	-5.32334	1.02e-07	1.13e-06	Translationally-controlled tumor protein	Unknown	AT3G16640
Vitvi05g00285	1537.67	1.09455	0.18111	6.04359	1.51e-09	2.41e-08	Proteasome 26S AAA-ATPase subunit (RPT5a)	Metabolism.Primary metabolism.Protein metabolism and modification.Proteolysis.cytoplasmic and nuclear protein degradation.Ubiquitin-mediated proteolysis.Proteasome	AT3G05530
Vitvi05g00292	323.012	4.50931	0.406499	11.093	1.36e-28	2.25e-26	Unknown protein	Unknown	AT4G15830
Vitvi05g00297	93.0749	-1.15635	0.403425	-2.86633	0.00415257	0.0139075	Cullin-1	Metabolism.Primary metabolism.Protein metabolism and modification.Proteolysis.cytoplasmic and nuclear protein degradation.Ubiquitin-mediated proteolysis
Vitvi05g00299	150.9	-3.49437	0.758209	-4.60871	4.05e-06	3.14e-05	Nuclear transcription factor Y subunit B-5	Regulation overview.Regulation of gene expression.Regulation of transcription.Transcription factor.CCAAT family transcription factor.HAP3-type-type	AT2G47810
Vitvi05g00312	540.81	1.64513	0.167792	9.80454	1.08e-22	9.53e-21	Unknown protein	Unknown	AT4G15790
Vitvi05g00313	64.2695	-1.43404	0.596893	-2.40251	0.0162832	0.0439638	Heavy-metal-associated domain-containing protein	Unclear
Vitvi05g00342	2234.74	-2.60736	0.428366	-6.08676	1.15e-09	1.87e-08	Glutaredoxin	Response to stimulus.Stress response.Abiotic stress response.Oxidative stress response	AT5G18600
Vitvi05g00343	898.6	-2.49914	0.461703	-5.41287	6.2e-08	7.18e-07	Glutaredoxin-like protein	Response to stimulus.Stress response.Abiotic stress response.Oxidative stress response	AT3G21460
Vitvi05g00349	148.218	2.76525	0.510901	5.41249	6.22e-08	7.19e-07	Integral membrane family protein UPF0497	Unknown	AT4G15630
Vitvi05g00350	200.326	2.00314	0.464649	4.31107	1.62e-05	0.000108704	3,8-divinyl protochlorophyllide a 8-vinyl reductase	Metabolism.Primary metabolism.Cofactor metabolism.Tetrapyrrole metabolism.Chlorophyll metabolism.Chlorophyll biosynthesis	AT5G18660
Vitvi05g00363	300.85	2.01403	0.277487	7.25811	3.93e-13	1.11e-11	EMB3013	Development.Reproductive development.Embryo development	AT5G18700
Vitvi05g00381	515.154	1.60117	0.276134	5.79852	6.69e-09	9.47e-08	Inosine-uridine preferring nucleoside hydrolase	Metabolism.Primary metabolism.Nucleobase, nucleoside, nucleotide, nucleic acid metabolism.Nucleotide metabolism.Purine metabolism	AT5G18860
Vitvi05g00385	343.446	1.61836	0.544528	2.97204	0.00295824	0.0103676	Unknown protein	Unknown	AT3G21550
Vitvi05g00386	460.607	2.68226	0.514483	5.21351	1.85e-07	1.94e-06	Endonuclease	Metabolism.Primary metabolism.Nucleobase, nucleoside, nucleotide, nucleic acid metabolism.Nucleic acid metabolism.DNA metabolism.DNA recombination and repair.repair	AT3G21530
Vitvi05g00402	380.848	4.02305	0.789163	5.09787	3.43e-07	3.41e-06	AWPM-19 membrane	Signaling.Hormone Signaling.ABA Signaling.ABA-mediated Signaling pathway	AT5G18970
Vitvi05g00403	610.935	1.77514	0.530561	3.34578	0.000820528	0.00343577	Glutamine synthetase	Metabolism.Primary metabolism.Amino acid metabolism.Glutamate metabolism	AT5G35630
Vitvi05g00421	253.373	-1.45088	0.35661	-4.06853	4.73e-05	0.000280172	Isopentenyltransferase	Signaling.Hormone Signaling.Cytokinin Signaling.Cytokinin metabolism.Cytokinin biosynthesis	AT5G19040
Vitvi05g00426	4818.34	1.38474	0.213867	6.47479	9.49e-11	1.82e-09	Copper-binding family protein	Unclear	AT5G19090
Vitvi05g00442	83.7557	3.93322	1.17994	3.33341	0.00085789	0.00356362	ADP-glucose pyrophosphorylase	Metabolism.Primary metabolism.Carbohydrate metabolism.Polysaccharide metabolism.Starch and sucrose metabolism	AT5G19220
Vitvi05g00444	146.122	2.97613	0.410554	7.24906	4.2e-13	1.18e-11	STE11 protein kinase homolog NPK1	Signaling.Signaling pathway.Protein kinase	AT3G06030
Vitvi05g00448	66.4689	2.56273	0.512927	4.99628	5.84e-07	5.55e-06	Unknown protein	Unknown
Vitvi05g00459	594.341	1.59173	0.383406	4.15154	3.3e-05	0.00020425	Leucine-rich repeat family protein	Diverse functions.Gene family with diverse functions.NBS-LRR superfamily	AT3G05990
Vitvi05g00463	1260.7	1.06282	0.370685	2.86717	0.00414162	0.0138765	Acyl-CoA synthetase long-chain member 6	Metabolism.Primary metabolism.Lipid metabolism.Fatty acid metabolism	AT3G05970
Vitvi05g00467	786.254	2.58521	0.280662	9.21112	3.23e-20	2.17e-18	Plastocyanin domain-containing protein	Metabolism.Primary metabolism.Generation of metabolite precursors and energy.Photosynthesis.Photosynthetic-chain phosphorylation	AT5G26330
Vitvi05g00472	1492.09	2.47775	0.203499	12.1757	4.19e-34	1.17e-31	Lipoxygenase	Metabolism.Primary metabolism.Lipid metabolism.Fatty acid metabolism.Alpha-linolenic acid metabolism	AT3G22400
Vitvi05g00474	8297.8	1.39453	0.284593	4.9001	9.58e-07	8.66e-06	Photosystem I reaction center subunit II, chloroplast precursor	Metabolism.Primary metabolism.Generation of metabolite precursors and energy.Photosynthesis.Photosystem I	AT1G03130
Vitvi05g00476	295.044	1.42419	0.412497	3.45261	0.000555181	0.0024537	Spermine synthase	Metabolism.Primary metabolism.Amino acid metabolism.Arginine and proline metabolism.Urea cycle	AT5G19530
Vitvi05g00486	2093.92	-2.49528	0.30732	-8.11948	4.68e-16	1.98e-14	Heat shock protein 70	Metabolism.Primary metabolism.Protein metabolism and modification.Protein folding.Chaperone-mediated protein folding.HSP-mediated protein folding	AT2G32120
Vitvi05g00487	238.888	5.90236	0.722321	8.17138	3.05e-16	1.33e-14	SEC14 cytosolic factor	Transport overview.Electrochemical Potential-driven Transporters.Porters.Drug/Metabolite Transporter.Triose-phosphate Transporter	AT3G22410
Vitvi05g00505	275.931	2.17845	0.534954	4.07222	4.66e-05	0.000276641	ferredoxin	Metabolism.Primary metabolism.Generation of metabolite precursors and energy.Photosynthesis.Photosynthetic-chain phosphorylation	AT4G14890
Vitvi05g00509	11.3229	6.75762	1.63889	4.12329	3.73e-05	0.00022824	Ovate family protein 12 OFP12	Development.Reproductive development.Fruit development	AT1G05420
Vitvi05g00519	67.9156	5.77502	0.65878	8.76623	1.85e-18	1.03e-16	Unknown protein	Unknown	AT1G05440
Vitvi05g00520	183.282	-1.28865	0.523168	-2.46317	0.0137716	0.0381873	Unknown protein	Unknown	AT3G22540
Vitvi05g00533	436.584	2.74686	0.346126	7.93602	2.09e-15	8.1e-14	Inositol polyphosphate 5'-phosphatase	Metabolism.Primary metabolism.Carbohydrate metabolism.Monosaccharide metabolism.Inositol phosphate metabolism	AT2G32010
Vitvi05g00534	363.209	-1.02756	0.207995	-4.94032	7.8e-07	7.19e-06	Embryo sac development arrest 15	Development.Reproductive development.Embryo development	AT4G14790
Vitvi05g00539	5919.54	-1.53244	0.241105	-6.35591	2.07e-10	3.79e-09	Homocysteine S-methyltransferase 3	Metabolism.Primary metabolism.Amino acid metabolism.Methionine metabolism	AT3G22740
Vitvi05g00541	745.296	2.14477	0.252285	8.50136	1.87e-17	9.38e-16	TSO1 (chinese for 'ugly')	Regulation overview.Regulation of gene expression.Regulation of transcription.Transcription factor.CPP family transcription factor	AT3G22780
Vitvi05g00542	5025.37	1.21448	0.198351	6.12288	9.19e-10	1.52e-08	Kinase interacting	Signaling.Signaling pathway.Protein kinase	AT3G22790
Vitvi05g00544	145.068	2.76391	0.468747	5.89639	3.72e-09	5.5e-08	Ribosomal protein S3A (RPS3aA) 40S	Metabolism.Primary metabolism.Protein metabolism and modification.Protein synthesis.Ribosome	AT3G22800
Vitvi05g00549	366.184	3.10508	0.427752	7.25907	3.9e-13	1.11e-11	Calmodulin-binding region IQD19	Signaling.Signaling pathway.Calcium sensors and Signaling	AT4G14750
Vitvi05g00561	1703.82	-2.52966	0.428587	-5.90233	3.58e-09	5.31e-08	Heat shock transcription factor A6B	Metabolism.Primary metabolism.Protein metabolism and modification.Protein folding.Chaperone-mediated protein folding.HSP-mediated protein folding	AT3G22830
Vitvi05g00582	16.2341	2.35826	0.806149	2.92534	0.00344084	0.0118324	Calcium-transporting ATPase 13 ACA13	Signaling.Signaling pathway.Calcium sensors and Signaling	AT3G22910
Vitvi05g00599	167.701	-2.55163	0.628555	-4.05952	4.92e-05	0.000289738	Calcium-transporting ATPase 13 ACA13	Signaling.Signaling pathway.Calcium sensors and Signaling	AT3G22910
Vitvi05g00604	122.557	3.26054	0.492236	6.62393	3.5e-11	7.28e-10	Unknown	Unknown
Vitvi05g00605	307.675	2.33416	0.55212	4.22763	2.36e-05	0.000151173	Calmodulin	Signaling.Signaling pathway.Calcium sensors and Signaling	AT3G22930
Vitvi05g00614	3498.83	1.49347	0.370446	4.03155	5.54e-05	0.000321921	GDP-mannose 3,5-epimerase 1	Metabolism.Primary metabolism.Organic acid metabolism.Ascorbate and aldarate metabolism	AT5G28840
Vitvi05g00625	3226.67	-1.22558	0.184802	-6.63186	3.31e-11	6.94e-10	DMI1 protein homologue	Transport overview.Channels and pores.a-Type channels.The Voltage-gated Ion Channel	AT5G43745
Vitvi05g00637	398.15	1.99238	0.270183	7.37416	1.65e-13	4.94e-12	Ankyrin repeat protein	Transport overview.Accessory factors involved in transport.Auxiliary transport proteins.Ankyrin
Vitvi05g00645	225.896	1.1607	0.342901	3.38496	0.000711893	0.00303899	H1flk	Cellular process.Cellular component organization and biogenesis.Nucleus.Chromosome organization and biogenesis.Chromatin assembly	AT1G04280
Vitvi05g00648	144.315	1.15244	0.440815	2.61435	0.00893984	0.0266706	H1flk, putative	Cellular process.Cellular component organization and biogenesis.Nucleus.Chromosome organization and biogenesis.Chromatin assembly	AT1G04280
Vitvi05g00652	965.516	1.9021	0.308318	6.16927	6.86e-10	1.16e-08	Seed specific protein Bn15D14A	Development.Reproductive development.Seed development	AT3G23090
Vitvi05g00663	61.8787	2.81418	1.00952	2.78766	0.00530908	0.0171576	forkhead-associated domain-containing protein	Regulation overview.Regulation of gene expression.Regulation of transcription.Transcription factor.FHA family transcription factor	AT4G14490
Vitvi05g00664	30.2798	2.62648	0.80141	3.27732	0.00104796	0.00424113	Agenet domain-containing protein	Unknown	AT5G52070
Vitvi05g00670	420.769	-2.12966	0.756179	-2.81634	0.00485741	0.0158793	Proteinase inhibitor 1 PPI3B2	Metabolism.Primary metabolism.Protein metabolism and modification.Proteolysis.Protease inhibition
Vitvi05g00681	682.942	-1.6979	0.496069	-3.4227	0.000620024	0.00269847	Cellulose synthase CSLG2	Cellular process.Cellular component organization and biogenesis.Cell wall organization and biogenesis.Cell wall metabolism.Cell wall biosynthesis.Cellulose biosynthesis	AT4G24000
Vitvi05g00694	455.673	1.36476	0.445191	3.06555	0.00217269	0.00796265	2-oxoglutarate-dependent dioxygenase	Metabolism.Cellular metabolism.Oxidation reduction	AT1G06620
Vitvi05g00703	35.5609	1.76945	0.669371	2.64346	0.00820644	0.0248146	No hit	No hit
Vitvi05g00713	216.501	2.06254	0.463082	4.45394	8.43e-06	6.08e-05	Zinc finger (C3HC4-type ring finger)	Regulation overview.Regulation of gene expression.Regulation of transcription.Transcription factor.Zinc finger C3HC4 family transcription factor	AT5G43420
Vitvi05g00726	875.239	3.71197	1.3923	2.66607	0.00767446	0.0234459	No hit	No hit
Vitvi05g00733	3.59284	5.0999	1.69198	3.01416	0.00257688	0.00921538	Inorganic phosphate transporter 1-4	Transport overview.Electrochemical Potential-driven Transporters.Porters.Major Facilitator Superfamily.Phosphate: H+ Symporter	AT2G38940
Vitvi05g00734	1159.76	4.75146	0.584893	8.12364	4.52e-16	1.92e-14	Inorganic phosphate transporter 1-4	Transport overview.Electrochemical Potential-driven Transporters.Porters.Major Facilitator Superfamily.Phosphate: H+ Symporter	AT2G38940
Vitvi05g00736	1209.14	-1.55986	0.193322	-8.06874	7.1e-16	2.92e-14	Phosphoenolpyruvate carboxylase kinase	Metabolism.Primary metabolism.Generation of metabolite precursors and energy.Citric acid cycle	AT1G08650
Vitvi05g00752	181.549	1.11772	0.334967	3.33681	0.00084745	0.00352623	Aldo/keto reductase	Metabolism.Primary metabolism.Carbohydrate metabolism.Monosaccharide metabolism.Pentose glucuronate interconversion	AT1G04420
Vitvi05g00778	55.2715	3.21313	1.18589	2.70947	0.006739	0.0210574	Unknown protein	Unknown	AT3G25400
Vitvi05g00780	171.504	3.55798	0.280081	12.7034	5.66e-37	2.01e-34	Kinesin phragmoplast-associated kinesin-related protein 2 (PAKRP2)	Cellular process.Cellular component organization and biogenesis.Cytoskeleton organization and biogenesis.Microtubule organization and biogenesis.Microtubule-driven movement	AT4G14330
Vitvi05g00783	272.449	2.52721	0.237522	10.6399	1.94e-26	2.63e-24	Unknown protein	Unknown	AT4G14310
Vitvi05g00784	89.1215	2.17395	0.535156	4.06227	4.86e-05	0.000286686	Alcohol oxidase	Metabolism.Cellular metabolism.Methane metabolism	AT3G23410
Vitvi05g00787	254.607	1.48801	0.404157	3.68177	0.000231621	0.00113538	Peroxisomal membrane protein PMP22	Response to stimulus.Stress response.Abiotic stress response.Oxidative stress response	AT4G14305
Vitvi05g00802	3513.5	1.57288	0.341364	4.60764	4.07e-06	3.16e-05	No hit	No hit
Vitvi05g00811	165.041	2.92026	0.929066	3.14322	0.00167101	0.00635831	Cyclopropane fatty acid synthase	Metabolism.Primary metabolism.Amino acid metabolism.Methionine metabolism	AT3G23530
Vitvi05g00815	171.321	4.83669	0.70672	6.84386	7.71e-12	1.78e-10	Unknown	Unknown
Vitvi05g00817	1010.34	1.09257	0.43833	2.49257	0.0126823	0.0356652	Proton gradient regulation 5 (PGR5)	Unclear	AT2G05620
Vitvi05g00819	107.121	-2.88914	0.282689	-10.2202	1.61e-24	1.82e-22	Caleosin	Signaling.Hormone Signaling.ABA Signaling.ABA-mediated Signaling pathway	AT4G26740
Vitvi05g00834	699.049	1.0181	0.29023	3.5079	0.000451653	0.00204629	RNA-binding protein cp29	Transport overview.Primary Active Transporters.P-P-bond hydrolysis-driven transporters.Nuclear mRNA Exporter	AT1G60000
Vitvi05g00836	3479.2	-2.23532	0.335388	-6.66487	2.65e-11	5.62e-10	Tetratricopeptide helical	Unknown	AT1G04530
Vitvi05g00837	418.59	-1.28499	0.31874	-4.03146	5.54e-05	0.000321966	C2 domain containing protein	Signaling.Signaling pathway.Protein kinase	AT2G33320
Vitvi05g00838	2496.12	-1.0287	0.260878	-3.9432	8.04e-05	0.000448729	IAA13	Signaling.Hormone Signaling.Auxin Signaling.Auxin-mediated Signaling pathway	AT2G33310
Vitvi05g00848	692.421	4.69105	0.300549	15.6083	6.39e-55	9.8e-52	Calcium ion binding protein	Unknown
Vitvi05g00857	14090.9	-1.53091	0.293121	-5.22279	1.76e-07	1.87e-06	AWPM-19	Signaling.Hormone Signaling.ABA Signaling.ABA-mediated Signaling pathway	AT1G04560
Vitvi05g00861	15.9463	-3.4286	1.03514	-3.31222	0.000925602	0.00380239	Myb domain protein 305	Regulation overview.Regulation of gene expression.Regulation of transcription.Transcription factor.MYB family transcription factor	AT3G24310
Vitvi05g00906	21.4935	2.07214	0.746441	2.77603	0.00550278	0.017702	N-6 Adenine-specific DNA methylase	Metabolism.Primary metabolism.Amino acid metabolism.Methionine metabolism	AT4G05200
Vitvi05g00948	20.3821	3.31676	1.27745	2.59639	0.00942092	0.0278283	LRR receptor-like kinase 2	Signaling.Signaling pathway.Protein kinase	AT3G24240
Vitvi05g00953	279.277	4.03839	0.818659	4.93294	8.1e-07	7.44e-06	Pectate lyase	Cellular process.Cellular component organization and biogenesis.Cell wall organization and biogenesis.Cell wall metabolism.Cell wall catabolism.Pectin catabolism	AT1G04680
Vitvi05g00960	1738.49	1.64888	0.246966	6.67654	2.45e-11	5.2e-10	Potassium channel protein	Transport overview.Accessory factors involved in transport.Auxiliary transport proteins.Voltage-gated K+ Channel beta-subunit	AT1G04690
Vitvi05g00961	52.7023	1.55059	0.509144	3.04549	0.00232302	0.0084317	Octicosapeptide/Phox/Bem1p; Protein kinase	Unknown	AT1G04700
Vitvi05g00963	244.891	-2.41996	0.541968	-4.46512	8e-06	5.8e-05	9-cis-epoxycarotenoid dioxygenase 4	Metabolism.Secondary metabolism.Terpenoid metabolism.Tetraterpenoid metabolism.Tetraterpenoid biosynthesis.Carotenoid biosynthesis	AT3G24220
Vitvi05g00990	365.193	1.4395	0.134438	10.7076	9.38e-27	1.34e-24	DNA primase large subunit	Metabolism.Primary metabolism.Nucleobase, nucleoside, nucleotide, nucleic acid metabolism.Nucleic acid metabolism.DNA metabolism.DNA replication	AT1G67320
Vitvi05g01044	18214.3	1.78002	0.326698	5.44852	5.08e-08	5.97e-07	Chalcone synthase	Metabolism.Secondary metabolism.Phenylpropanoid metabolism.Flavonoid metabolism.Flavonoid biosynthesis	AT5G13930
Vitvi05g01061	3276.8	-1.09693	0.234527	-4.6772	2.91e-06	2.33e-05	Cyclin-dependent kinase inhibitor (KIP-related protein 4)	Cellular process.Cell growth and death	AT2G32710
Vitvi05g01072	61.9509	-1.17631	0.413503	-2.84475	0.00444467	0.0147229	High mobility group (HMG1/2)	Regulation overview.Regulation of gene expression.Regulation of transcription.Transcription factor.ARID family transcription factor	AT1G04880
Vitvi05g01073	64.6459	2.30438	0.578246	3.98511	6.74e-05	0.00038342	Ethylene-responsive transcription factor ERF062	Signaling.Hormone Signaling.Ethylene Signaling.Ethylene-mediated Signaling pathway	AT4G13620
Vitvi05g01076	3.53666	5.07736	1.30026	3.90488	9.43e-05	0.000517324	Small ubiquitin modifier 2 (SUMO)	Transport overview.Nucleocytoplasmic transport.Nuclear pore complex
Vitvi05g01080	123.679	3.83796	0.664788	5.77321	7.78e-09	1.09e-07	Glucan endo-1,3-beta-glucosidase 4 precursor	Metabolism.Primary metabolism.Carbohydrate metabolism.Polysaccharide metabolism.Starch and sucrose metabolism	AT4G13600
Vitvi05g01104	304.536	2.25079	0.222105	10.1339	3.91e-24	4.1e-22	Kinesin PAKRP1L	Cellular process.Cellular component organization and biogenesis.Cytoskeleton organization and biogenesis.Microtubule organization and biogenesis.Microtubule-driven movement	AT3G23670
Vitvi05g01108	20447.7	1.12333	0.206337	5.44416	5.21e-08	6.1e-07	Nucleotide sugar epimerase	Metabolism.Primary metabolism.Carbohydrate metabolism.Polysaccharide metabolism.Starch and sucrose metabolism	AT3G23820
Vitvi05g01136	211.996	1.20922	0.429621	2.81461	0.0048837	0.0159489	RPM1-interacting protein 4	Response to stimulus.Stress response.Biotic stress response.Plant-pathogen interaction
Vitvi05g01154	40.2966	-1.14973	0.480392	-2.39331	0.0166972	0.0448938	TIR-NBS-TIR type disease resistance protein	Diverse functions.Gene family with diverse functions.NBS-LRR superfamily	AT5G17680
Vitvi05g01170	74.8649	-1.15127	0.260602	-4.41771	9.98e-06	7.06e-05	Tripeptidyl-peptidase 2	Metabolism.Primary metabolism.Protein metabolism and modification.Proteolysis.Peptidase-mediated proteolysis	AT4G20850
Vitvi05g01231	163.121	3.71221	0.500955	7.41027	1.26e-13	3.84e-12	Ankyrin repeat protein	Diverse functions.Gene family with diverse functions.Ankyrin domain family
Vitvi05g01236	3.04924	4.86514	1.80546	2.69468	0.00704569	0.0218709	Seven in absentia SINA4	Metabolism.Primary metabolism.Protein metabolism and modification.Proteolysis.cytoplasmic and nuclear protein degradation.Ubiquitin-mediated proteolysis	AT4G27880
Vitvi05g01265	6719.76	3.04869	0.337086	9.04426	1.51e-19	9.55e-18	Xyloglucan endotransglucosylase/hydrolase 23	Cellular process.Cellular component organization and biogenesis.Cell wall organization and biogenesis.Cell wall metabolism.Cell wall modification.Xyloglucan modification	AT4G14130
Vitvi05g01266	1702.91	3.57056	0.441271	8.09153	5.89e-16	2.45e-14	Xyloglucan endotransglucosylase/hydrolase 15	Cellular process.Cellular component organization and biogenesis.Cell wall organization and biogenesis.Cell wall metabolism.Cell wall modification.Xyloglucan modification	AT3G23730
Vitvi05g01267	95.4208	4.99138	0.494881	10.086	6.37e-24	6.38e-22	Unknown	Unknown
Vitvi05g01269	45.3855	1.84796	0.645004	2.86504	0.00416957	0.0139606	UDP-glucose:flavonoid 7-O-glucosyltransferase	Metabolism.Secondary metabolism.Phenylpropanoid metabolism.Flavonoid metabolism.Flavonoid biosynthesis.Flavonoid-glycoside biosynthesis	AT4G15550
Vitvi05g01276	573.972	2.83207	0.532474	5.31869	1.05e-07	1.16e-06	UDP-glucose:flavonoid 7-O-glucosyltransferase	Metabolism.Secondary metabolism.Phenylpropanoid metabolism.Flavonoid metabolism.Flavonoid biosynthesis.Flavonoid-glycoside biosynthesis	AT4G15550
Vitvi05g01278	469.47	-2.02224	0.411559	-4.91362	8.94e-07	8.13e-06	UDP-glucose:flavonoid 7-O-glucosyltransferase	Metabolism.Secondary metabolism.Phenylpropanoid metabolism.Flavonoid metabolism.Flavonoid biosynthesis.Flavonoid-glycoside biosynthesis	AT4G15550
Vitvi05g01285	277.501	3.36717	0.465342	7.2359	4.62e-13	1.29e-11	UDP-glucose:flavonoid 7-O-glucosyltransferase	Metabolism.Secondary metabolism.Phenylpropanoid metabolism.Flavonoid metabolism.Flavonoid biosynthesis.Flavonoid-glycoside biosynthesis	AT4G15550
Vitvi05g01288	37.7341	-3.04816	0.599536	-5.08419	3.69e-07	3.64e-06	UDP-glucose:flavonoid 7-O-glucosyltransferase	Metabolism.Secondary metabolism.Phenylpropanoid metabolism.Flavonoid metabolism.Flavonoid biosynthesis.Flavonoid-glycoside biosynthesis	AT4G15550
Vitvi05g01294	49.1343	3.4827	1.22661	2.83929	0.00452144	0.0149449	UDP-glucose:flavonoid 7-O-glucosyltransferase	Metabolism.Secondary metabolism.Phenylpropanoid metabolism.Flavonoid metabolism.Flavonoid biosynthesis.Flavonoid-glycoside biosynthesis	AT4G15550
Vitvi05g01304	922.545	1.1276	0.259659	4.3426	1.41e-05	9.57e-05	UDP-glucoronosyl/UDP-glucosyl transferase UGT75C1	Metabolism.Secondary metabolism.Phenylpropanoid metabolism.Flavonoid metabolism.Flavonoid biosynthesis.Anthocyanin biosynthesis.Anthocyanin-glycoside biosynthesis	AT4G14090
Vitvi05g01308	116.076	1.08981	0.296587	3.67452	0.0002383	0.00116509	Rho GDP-dissociation inhibitor 2	Signaling.Signaling pathway.G-protein signaling pathway	AT3G07880
Vitvi05g01314	201.471	1.30646	0.442988	2.9492	0.00318593	0.0110628	Unknown protein	Unknown	AT3G25400
Vitvi05g01317	1129.04	1.43403	0.354042	4.05045	5.11e-05	0.000300191	Ribosomal protein S1	Metabolism.Primary metabolism.Protein metabolism and modification.Protein synthesis.Ribosome	AT3G23700
Vitvi05g01318	162.11	3.57862	0.532577	6.71945	1.82e-11	3.93e-10	RAB GTPase ARA4	Cellular process.Cellular transport.Protein trafficking.Vesicle-mediated trafficking	AT2G43130
Vitvi05g01324	6351.09	-1.48884	0.190889	-7.79953	6.21e-15	2.26e-13	Alpha-glucan water dikinase isoform 3, Chloroplast	Transport overview.Accessory factors involved in transport.Auxiliary transport proteins.Phosphotransferase System Enzyme I	AT5G26570
Vitvi05g01326	61.7315	3.48395	0.886382	3.93053	8.48e-05	0.000470379	No hit	No hit
Vitvi05g01330	622.952	4.36838	0.332288	13.1464	1.79e-39	7.3e-37	Exostosin (Xyloglucan galactosyltransferase KATAMARI 1)	Metabolism.Primary metabolism.Carbohydrate metabolism.Oligosaccharide metabolism.Glycan metabolism.Glycan structures-biosynthesis1	AT2G20370
Vitvi05g01332	24.683	1.56693	0.596865	2.62527	0.00865801	0.0259624	Pyruvate decarboxylase isozyme 2	Metabolism.Primary metabolism.Carbohydrate metabolism.Glycolysis Gluconeogenesis
Vitvi05g01343	875.029	2.22034	0.29873	7.43259	1.06e-13	3.28e-12	Receptor protein kinase	Signaling.Signaling pathway.Protein kinase	AT3G28040
Vitvi05g01348	543.734	1.77847	0.591648	3.00596	0.00264741	0.0094291	PIN1	Signaling.Hormone Signaling.Auxin Signaling.Auxin transport	AT5G57090
Vitvi05g01351	425.071	1.54606	0.490385	3.15275	0.00161739	0.00617819	Amino acid permease	Transport overview.Electrochemical Potential-driven Transporters.Porters.Amino Acid/Auxin Permease	AT5G16740
Vitvi05g01353	3540.63	-1.82135	0.354655	-5.13556	2.81e-07	2.86e-06	Pectinesterase family	Cellular process.Cellular component organization and biogenesis.Cell wall organization and biogenesis.Cell wall metabolism.Cell wall modification.Pectin modification	AT3G59010
Vitvi05g01392	53.8213	-2.2191	0.900057	-2.46552	0.0136816	0.0379805	F-box domain containing protein	Metabolism.Primary metabolism.Protein metabolism and modification.Proteolysis.cytoplasmic and nuclear protein degradation.Ubiquitin-mediated proteolysis
Vitvi05g01417	12.7485	2.07629	0.793555	2.61644	0.00888531	0.0265434	Protein kinase CRK1 CRK1 protein(Cdc2-related kinase 1)	Signaling.Signaling pathway.Protein kinase	AT1G53050
Vitvi05g01427	114.023	1.45798	0.540591	2.697	0.00699663	0.0217455	Ankyrin repeat protein family	Transport overview.Accessory factors involved in transport.Auxiliary transport proteins.Ankyrin
Vitvi05g01437	64.0865	4.87177	0.995588	4.89336	9.91e-07	8.92e-06	Ankyrin repeat	Transport overview.Accessory factors involved in transport.Auxiliary transport proteins.Ankyrin	AT4G03500
Vitvi05g01447	29.3855	4.41021	1.37906	3.19798	0.00138396	0.00540216	Ankyrin repeat family	Transport overview.Accessory factors involved in transport.Auxiliary transport proteins.Ankyrin	AT4G03490
Vitvi05g01450	173.436	4.30411	1.34763	3.19384	0.00140394	0.0054723	Ankyrin repeat	Transport overview.Accessory factors involved in transport.Auxiliary transport proteins.Ankyrin	AT4G03500
Vitvi05g01464	78.4721	3.86176	0.580402	6.6536	2.86e-11	6.03e-10	Ankyrin repeat protein family	Transport overview.Accessory factors involved in transport.Auxiliary transport proteins.Ankyrin	AT1G03670
Vitvi05g01516	5151.04	1.35476	0.199341	6.79619	1.07e-11	2.42e-10	fructokinase-1	Metabolism.Primary metabolism.Carbohydrate metabolism.Monosaccharide metabolism.Fructose and mannose metabolism	AT3G59480
Vitvi05g01528	16.4438	3.08106	1.15279	2.67269	0.00752458	0.0230511	Glucosyltransferase-11	Metabolism.Primary metabolism.Carbohydrate metabolism.Glycosyl transference	AT1G22400
Vitvi05g01530	61.3413	2.45864	0.503754	4.88063	1.06e-06	9.45e-06	Glucosyltransferase-12	Metabolism.Primary metabolism.Carbohydrate metabolism.Glycosyl transference	AT1G22400
Vitvi05g01545	5081.8	-1.12489	0.220019	-5.11268	3.18e-07	3.18e-06	Calreticulin-3 precursor	Signaling.Signaling pathway.Calcium sensors and Signaling	AT1G08450
Vitvi05g01577	5.43801	5.70093	2.05278	2.77718	0.00548335	0.0176441	Chitinase, class IV [Vitis vinifera]	Metabolism.Primary metabolism.Carbohydrate metabolism.Monosaccharide metabolism.Amino sugar metabolism	AT3G54420
Vitvi05g01602	160.502	3.37961	0.2752	12.2805	1.15e-34	3.49e-32	Unknown protein	Unknown	AT3G59680
Vitvi05g01622	3128.14	-1.08791	0.148443	-7.32881	2.32e-13	6.76e-12	Unknown protein	Unknown	AT2G43780
Vitvi05g01627	98.6562	1.52529	0.341789	4.46267	8.09e-06	5.86e-05	Ion channel DMI1, chloroplast precursor	Transport overview.Channels and pores.a-Type channels.The Voltage-gated Ion Channel	AT5G49960
Vitvi05g01638	3721.29	1.2229	0.211956	5.76961	7.95e-09	1.11e-07	formin protein AHF1	Cellular process.Cellular component organization and biogenesis.Cytoskeleton organization and biogenesis.Actin organization and biogenesis	AT3G25500
Vitvi05g01642	201.298	5.88893	0.719006	8.19038	2.6e-16	1.14e-14	UDP-xylose phenolic glycosyltransferase	Metabolism.Secondary metabolism.Aromatic compound metabolism.Aromatic compound glysosidase	AT2G43820
Vitvi05g01661	2978.04	1.30221	0.244768	5.32018	1.04e-07	1.15e-06	NADP-dependent oxidoreductase	Unclear	AT1G26320
Vitvi05g01662	102.47	1.04303	0.425014	2.45412	0.0141231	0.0390031	Allyl alcohol dehydrogenase	Unclear	AT5G16990
Vitvi05g01663	3201.18	1.05006	0.237147	4.4279	9.52e-06	6.75e-05	Allyl alcohol dehydrogenase	Unclear	AT5G16990
Vitvi05g01674	61.0385	-2.26441	0.652476	-3.47049	0.000519516	0.00231358	Allyl alcohol dehydrogenase	Unclear	AT5G37980
Vitvi05g01694	20.282	7.59866	0.920985	8.25058	1.58e-16	7.06e-15	ADP-glucose pyrophosphorylase, small subunit precursor	Metabolism.Primary metabolism.Carbohydrate metabolism.Polysaccharide metabolism.Starch and sucrose metabolism	AT1G05610
Vitvi05g01703	1013.21	1.83961	0.413197	4.45214	8.5e-06	6.13e-05	Kelch repeat-containing F-box protein	Unknown	AT3G59940
Vitvi05g01723	183.896	-3.05529	0.452758	-6.74817	1.5e-11	3.28e-10	Ethylene-responsive transcription factor ERF098	Signaling.Hormone Signaling.Ethylene Signaling.Ethylene-mediated Signaling pathway	AT3G23230
Vitvi05g01726	3.74343	5.16374	1.656	3.1182	0.00181957	0.00684123	MADS-box agamous-like 80	Regulation overview.Regulation of gene expression.Regulation of transcription.Transcription factor.MADS-box family transcription factor	AT5G48670
Vitvi05g01732	40.5752	1.72356	0.652834	2.64012	0.00828766	0.0250139	Myb domain protein 14	Regulation overview.Regulation of gene expression.Regulation of transcription.Transcription factor.MYB family transcription factor	AT3G23250
Vitvi05g01743	57.2523	3.03699	0.793244	3.82857	0.000128887	0.00068106	Unknown protein	Unknown	AT3G06840
Vitvi05g01747	17.9426	3.3399	1.12453	2.97005	0.00297748	0.0104231	Unknown	Unknown
Vitvi05g01750	69.4478	1.95867	0.685885	2.85569	0.00429438	0.014316	Unknown	Unknown
Vitvi05g01751	682.863	2.05276	0.344194	5.96397	2.46e-09	3.79e-08	SAG101 (senescence-associated gene 101)	Metabolism.Primary metabolism.Lipid metabolism.Glycerolipid metabolism.Glycerolipid catabolism	AT5G14930
Vitvi05g01754	397.75	4.73087	1.12857	4.19191	2.77e-05	0.000174203	Pathogenesis protein 10 [Vitis vinifera]	Response to stimulus.Stress response.Biotic stress response
Vitvi05g01755	16.0211	-3.65595	1.11127	-3.28988	0.00100232	0.004082	Major allergen Mal d 1	Response to stimulus.Stress response.Biotic stress response
Vitvi05g01756	953886	-1.83252	0.268268	-6.83095	8.44e-12	1.93e-10	No hit	No hit
Vitvi05g01768	109.753	1.74555	0.515764	3.38439	0.00071336	0.00304419	Aldo-keto reductase	Metabolism.Primary metabolism.Carbohydrate metabolism.Monosaccharide metabolism.Pentose glucuronate interconversion	AT4G24220
Vitvi05g01769	10.4815	6.64638	1.29218	5.14356	2.7e-07	2.75e-06	Aldo-keto reductase	Metabolism.Primary metabolism.Carbohydrate metabolism.Monosaccharide metabolism.Pentose glucuronate interconversion	AT4G24220
Vitvi05g01816	486.62	-1.50136	0.311551	-4.81899	1.44e-06	1.24e-05	No hit	No hit
Vitvi05g01829	18.2344	-2.10788	0.747327	-2.82055	0.00479409	0.015696	No hit	No hit
Vitvi05g01833	7024.41	-4.43088	0.534576	-8.28859	1.15e-16	5.23e-15	No hit	No hit
Vitvi05g01835	1784.5	1.11392	0.435009	2.56068	0.0104468	0.0302897	Soluble diacylglycerol acyltransferase	Metabolism.Primary metabolism.Lipid metabolism.Glycerolipid metabolism.Glycerolipid biosynthesis	AT1G48300
Vitvi05g01843	55.0439	2.78517	0.87059	3.19918	0.00137818	0.00538218	Unknown protein	Unknown
Vitvi05g01844	81.6344	-1.49755	0.319459	-4.68778	2.76e-06	2.23e-05	No hit	No hit
Vitvi05g01877	2536.53	1.02524	0.300017	3.41729	0.000632489	0.00274735	Unknown protein	Unknown	AT5G19190
Vitvi05g01879	470.16	3.41774	0.347042	9.8482	6.98e-23	6.36e-21	GPI-anchored protein-like protein II	Unknown	AT3G06035
Vitvi05g01884	40.4911	1.63371	0.377269	4.33035	1.49e-05	0.000100544	Diamine oxidase	Metabolism.Primary metabolism.Amino acid metabolism.Arginine and proline metabolism.Urea cycle	AT4G14940
Vitvi05g01895	200.87	-1.28607	0.286054	-4.49589	6.93e-06	5.1e-05	Disease resistance protein (NBS-LRR class)	Diverse functions.Gene family with diverse functions.NBS-LRR superfamily	AT3G07040
Vitvi05g01910	773.096	-2.34344	0.605796	-3.86837	0.000109564	0.000591049	Inhibitor of trypsin and hageman factor (CMTI-V)	Metabolism.Primary metabolism.Protein metabolism and modification.Proteolysis
Vitvi05g01911	82.9003	-2.62879	0.609888	-4.31028	1.63e-05	0.000109035	Inhibitor of trypsin and hageman factor (CMTI-V)	Metabolism.Primary metabolism.Protein metabolism and modification.Proteolysis
Vitvi05g01916	456.621	-1.06968	0.261167	-4.09577	4.21e-05	0.000253545	DNA-binding protein	Metabolism.Primary metabolism.Nucleobase, nucleoside, nucleotide, nucleic acid metabolism.Nucleic acid metabolism.DNA metabolism	AT4G14465
Vitvi05g01924	82.653	2.63352	0.831061	3.16887	0.00153035	0.00588371	1-aminocyclopropane-1-carboxylate oxidase homolog 1	Metabolism.Primary metabolism.Organic acid metabolism.Propanoate metabolism	AT1G06620
Vitvi05g01929	1287.66	1.55034	0.311115	4.98319	6.25e-07	5.88e-06	Desacetoxyvindoline 4-hydroxylase	Metabolism.Secondary metabolism.Terpenoid metabolism.Monoterpenoid metabolism.Monoterpenoid biosynthesis	AT1G06620
Vitvi05g01931	2713.49	2.0716	0.510789	4.05568	5e-05	0.000293975	No hit	No hit
Vitvi05g01933	788896	-3.71894	0.339478	-10.9549	6.3e-28	1e-25	No hit	No hit
Vitvi05g01934	17920.7	-1.69704	0.358945	-4.72786	2.27e-06	1.87e-05	Unknown	Unknown
Vitvi05g01938	4979.41	-1.15777	0.374836	-3.08872	0.00201019	0.00745171	No hit	No hit
Vitvi05g01940	4197.06	1.06368	0.35101	3.03033	0.00244289	0.00879908	No hit	No hit
Vitvi05g01945	5792.8	7.32932	0.532885	13.7541	4.82e-43	3.11e-40	No hit	No hit
Vitvi05g01946	24.2971	3.71538	0.934202	3.97707	6.98e-05	0.000395245	No hit	No hit
Vitvi05g01947	3848.66	4.38306	0.793825	5.52144	3.36e-08	4.13e-07	No hit	No hit
Vitvi05g01948	22.199	5.5924	0.972357	5.75138	8.85e-09	1.22e-07	No hit	No hit
Vitvi05g01949	16082.5	10.8269	1.21734	8.89385	5.9e-19	3.51e-17	No hit	No hit
Vitvi05g01950	6598.51	5.45615	0.999686	5.45787	4.82e-08	5.69e-07	Unknown protein	Unknown
Vitvi05g01951	19545.7	10.5607	0.601843	17.5473	6.23e-69	3.06e-65	No hit	No hit
Vitvi05g01953	6761.3	4.82847	0.938715	5.1437	2.69e-07	2.75e-06	No hit	No hit
Vitvi05g01956	12045.9	1.76133	0.378512	4.6533	3.27e-06	2.59e-05	Inorganic phosphate transporter 1-4	Transport overview.Electrochemical Potential-driven Transporters.Porters.Major Facilitator Superfamily.Phosphate: H+ Symporter	AT2G38940
Vitvi05g01958	55.3925	4.22291	0.981092	4.30429	1.68e-05	0.000111629	Unknown	Unknown
Vitvi05g02017	3399.81	2.41656	0.814096	2.9684	0.00299354	0.0104756	Unknown protein	Unknown
Vitvi05g02018	392.871	1.89929	0.66849	2.84116	0.00449502	0.0148736	No hit	No hit
Vitvi05g02068	574.033	-1.20954	0.245706	-4.92274	8.53e-07	7.8e-06	R protein L6	Response to stimulus.Stress response.Biotic stress response.Plant-pathogen interaction.R proteins from Plant-pathogen interaction	AT5G17680
Vitvi05g02082	104.606	1.77626	0.585266	3.03496	0.0024057	0.00868553	No hit	No hit
Vitvi05g02084	464.598	1.04645	0.175258	5.97091	2.36e-09	3.64e-08	Ankyrin repeat	Transport overview.Accessory factors involved in transport.Auxiliary transport proteins.Ankyrin	AT1G03670
Vitvi05g02085	250.251	1.04197	0.279366	3.72976	0.000191663	0.000961016	Ankyrin	Transport overview.Accessory factors involved in transport.Auxiliary transport proteins.Ankyrin
Vitvi05g02086	135.728	-1.02257	0.225095	-4.54283	5.55e-06	4.15e-05	Protein kinase Xa21	Signaling.Signaling pathway.Protein kinase	AT3G47570
Vitvi05g02087	36.683	4.35055	0.72432	6.00639	1.9e-09	2.98e-08	No hit	No hit
Vitvi05g02090	93.9131	5.03753	1.70676	2.95152	0.00316218	0.0109881	Ankyrin repeat	Transport overview.Accessory factors involved in transport.Auxiliary transport proteins.Ankyrin
Vitvi05g02096	471.888	5.08565	0.582905	8.72466	2.67e-18	1.46e-16	Ankyrin repeat	Transport overview.Accessory factors involved in transport.Auxiliary transport proteins.Ankyrin
Vitvi05g02097	16.1522	2.96915	1.00648	2.95005	0.00317726	0.0110374	Ankyrin repeat protein	Diverse functions.Gene family with diverse functions.Ankyrin domain family
Vitvi05g02100	437.971	-1.11336	0.222009	-5.01492	5.31e-07	5.06e-06	F-box family protein	Metabolism.Primary metabolism.Protein metabolism and modification.Proteolysis.cytoplasmic and nuclear protein degradation.Ubiquitin-mediated proteolysis
Vitvi05g02102	3.69206	5.14176	2.15319	2.38797	0.0169415	0.045461	UDP-glucose:flavonoid 7-O-glucosyltransferase	Metabolism.Secondary metabolism.Phenylpropanoid metabolism.Flavonoid metabolism.Flavonoid biosynthesis.Flavonoid-glycoside biosynthesis
Vitvi05g02103	429.504	4.8773	0.437082	11.1588	6.49e-29	1.1e-26	UDP-glucose:flavonoid 7-O-glucosyltransferase	Metabolism.Secondary metabolism.Phenylpropanoid metabolism.Flavonoid metabolism.Flavonoid biosynthesis.Flavonoid-glycoside biosynthesis	AT4G15550
Vitvi05g02116	1547.51	1.01996	0.212422	4.80157	1.57e-06	1.35e-05	UDP-glucoronosyl/UDP-glucosyl transferase UGT75C1	Metabolism.Secondary metabolism.Phenylpropanoid metabolism.Flavonoid metabolism.Flavonoid biosynthesis.Anthocyanin biosynthesis.Anthocyanin-glycoside biosynthesis	AT4G14090
Vitvi05g02119	73.6532	-2.07445	0.419795	-4.94158	7.75e-07	7.15e-06	Aldo/keto reductase AKR	Metabolism.Primary metabolism.Carbohydrate metabolism.Monosaccharide metabolism.Pentose glucuronate interconversion	AT1G60730
Vitvi05g02120	19.2113	2.02287	0.784383	2.57893	0.00991071	0.0290026	Unknown	Unknown
Vitvi05g02122	17073	4.96431	0.803895	6.17532	6.6e-10	1.12e-08	No hit	No hit
Vitvi05g02124	21.0183	3.11341	1.12699	2.76259	0.00573439	0.0183388	Unknown protein	Unknown	AT1G05835
Vitvi05g02131	26.8597	4.96265	0.897402	5.53002	3.2e-08	3.95e-07	No hit	No hit
Vitvi05g02157	5.6792	3.37226	1.29792	2.59821	0.00937121	0.0277062	GAG-POL precursor [Vitis vinifera]	Transposable elements viral and plasmid proteins.Protein from transposable element
Vitvi05g02167	6.05332	5.85249	2.13205	2.74501	0.00605094	0.0191985	Ankyrin repeat	Transport overview.Accessory factors involved in transport.Auxiliary transport proteins.Ankyrin	AT4G03500
Vitvi05g02168	123.495	5.84576	0.665964	8.77789	1.67e-18	9.35e-17	Ankyrin repeat protein family	Transport overview.Accessory factors involved in transport.Auxiliary transport proteins.Ankyrin	AT1G03670
Vitvi05g02172	53.4898	8.99705	1.07832	8.34362	7.2e-17	3.39e-15	Ankyrin repeat protein family	Transport overview.Accessory factors involved in transport.Auxiliary transport proteins.Ankyrin	AT1G03670
Vitvi05g02180	60.7041	-2.48763	0.589224	-4.22188	2.42e-05	0.000154598	Unknown protein	Unknown	AT5G01150
Vitvi05g02195	65.1774	1.29758	0.452349	2.86855	0.00412362	0.0138275	Unknown protein	Unknown	AT5G45470
Vitvi05g02198	14.6457	3.03415	1.09741	2.76483	0.00569518	0.0182301	Unknown protein	Unknown	AT5G45540
Vitvi05g02201	29.6993	3.48746	1.06695	3.26862	0.00108073	0.00434861	Unknown protein	Unknown	AT5G45540
Vitvi05g02203	80.851	1.93509	0.756661	2.55741	0.0105454	0.030525	R protein PRF disease resistance protein	Response to stimulus.Stress response.Biotic stress response.Plant-pathogen interaction.R proteins from Plant-pathogen interaction	AT5G35450
Vitvi05g02233	182.94	1.10453	0.348788	3.16678	0.00154135	0.00592229	Unknown protein	Unknown	AT5G45540
Vitvi05g02236	41.5842	1.54861	0.527314	2.9368	0.00331621	0.0114584	R protein PRF disease resistance protein	Response to stimulus.Stress response.Biotic stress response.Plant-pathogen interaction.R proteins from Plant-pathogen interaction	AT1G59780
Vitvi05g02251	2180.67	1.5465	0.542527	2.85054	0.00436453	0.0145012	Chitinase class IV	Metabolism.Primary metabolism.Carbohydrate metabolism.Monosaccharide metabolism.Amino sugar metabolism	AT3G54420
Vitvi05g02264	33.1798	3.25696	0.978035	3.3301	0.000868142	0.00360072	Indole-3-acetate beta-glucosyltransferase	Signaling.Hormone Signaling.Auxin Signaling.Auxin metabolism.Auxin inactivation by conjugation	AT1G05680
Vitvi05g02268	3873.72	1.8594	0.183133	10.1533	3.2e-24	3.4e-22	Allyl alcohol dehydrogenase	Unclear	AT5G16990
Vitvi06g00024	55.3352	-4.70452	0.79859	-5.89103	3.84e-09	5.66e-08	MYR1 (MYB-related protein 1)	Regulation overview.Regulation of gene expression.Regulation of transcription.Transcription factor.G2-like family transcription factor
Vitvi06g00033	325.416	2.07779	0.417075	4.98182	6.3e-07	5.91e-06	Shoot1 protein	Unclear	AT1G55480
Vitvi06g00042	18.2423	3.49611	1.15007	3.03992	0.00236644	0.00856394	Hcr2-p4.1	Response to stimulus.Stress response.Biotic stress response	AT4G04220
Vitvi06g00047	2705.82	2.08034	0.362658	5.73639	9.67e-09	1.32e-07	No hit	No hit
Vitvi06g00063	661.542	2.35247	0.32359	7.2699	3.6e-13	1.03e-11	Accelerated cell death 1 ACD1	Transport overview.Primary Active Transporters.P-P-bond hydrolysis-driven transporters.Chloroplast Env Prot Translocase	AT4G25650
Vitvi06g00069	187.716	1.18581	0.317002	3.74069	0.000183515	0.000924699	Curculin (mannose-binding) lectin	Unknown	AT2G41890
Vitvi06g00074	736.905	1.70045	0.177115	9.60085	7.93e-22	6.5e-20	Glucan endo-1,3-beta-glucosidase 4 precursor	Metabolism.Primary metabolism.Carbohydrate metabolism.Polysaccharide metabolism.Starch and sucrose metabolism	AT3G13560
Vitvi06g00093	458.438	4.85901	0.475513	10.2184	1.64e-24	1.84e-22	Protease inhibitor/seed storage/lipid transfer protein (LTP)	Transport overview.Macromolecule transport.Lipid transport	AT2G44300
Vitvi06g00102	172.243	3.04943	0.618058	4.93389	8.06e-07	7.41e-06	Chromomethylase	Metabolism.Primary metabolism.Nucleobase, nucleoside, nucleotide, nucleic acid metabolism.Nucleic acid metabolism.DNA metabolism.DNA replication	AT1G69770
Vitvi06g00106	1634.41	-1.70995	0.253666	-6.74097	1.57e-11	3.43e-10	Cation efflux family protein MTPc3	Transport overview.Electrochemical Potential-driven Transporters.Porters.Cation Diffusion Facilitator	AT3G58060
Vitvi06g00109	401.407	-2.20917	0.624926	-3.5351	0.000407623	0.00186785	Unknown protein	Unknown
Vitvi06g00111	8940.88	-2.11519	0.248331	-8.51763	1.63e-17	8.2e-16	Peroxidase	Metabolism.Primary metabolism.Amino acid metabolism.Aromatic amino acid metabolism.Phenylalanine metabolism.Phenylalanine biosynthesis	AT5G06730
Vitvi06g00115	205.32	3.01452	0.514342	5.86094	4.6e-09	6.7e-08	PAP/fibrillin family	Cellular process	AT1G51110
Vitvi06g00121	2739.68	1.37588	0.228526	6.02067	1.74e-09	2.74e-08	Callose synthase catalytic subunit	Metabolism.Primary metabolism.Carbohydrate metabolism.Polysaccharide metabolism.Starch and sucrose metabolism
Vitvi06g00134	3582.29	1.2135	0.313718	3.86811	0.000109681	0.000591552	S-receptor kinase	Signaling.Signaling pathway.Protein kinase	AT5G60900
Vitvi06g00137	314.603	2.88208	0.428396	6.72759	1.72e-11	3.73e-10	S-receptor kinase	Signaling.Signaling pathway.Protein kinase	AT5G60900
Vitvi06g00153	96.6837	-2.52583	0.583144	-4.3314	1.48e-05	0.000100117	Lipoxygenase LOX1	Metabolism.Primary metabolism.Lipid metabolism.Fatty acid metabolism.Alpha-linolenic acid metabolism	AT3G45140
Vitvi06g00158	600.768	3.02115	0.728362	4.14787	3.36e-05	0.000207254	No hit	No hit
Vitvi06g00169	102.687	-1.12046	0.370658	-3.02288	0.00250381	0.0089814	UDP-glucoronosyl and UDP-glucosyl transferase	Unclear	AT5G12890
Vitvi06g00172	292.693	1.50806	0.385351	3.91346	9.1e-05	0.000501295	UDP-glucoronosyl and UDP-glucosyl transferase	Unclear	AT5G12890
Vitvi06g00175	390.636	4.7633	0.583402	8.16469	3.22e-16	1.39e-14	Histone H3	Cellular process.Cellular component organization and biogenesis.Nucleus.Chromosome organization and biogenesis.Chromatin assembly	AT5G65360
Vitvi06g00178	517.857	4.95673	0.536076	9.24631	2.32e-20	1.57e-18	No hit	No hit
Vitvi06g00180	201.988	2.81331	0.509731	5.51922	3.41e-08	4.17e-07	Unknown protein	Unknown	AT5G12930
Vitvi06g00182	3812.47	-1.71592	0.391025	-4.38825	1.14e-05	7.94e-05	Polygalacturonase inhibitor protein	Cellular process.Cellular component organization and biogenesis.Cell wall organization and biogenesis.Cell wall metabolism.Cell wall modification.Pectin modification.Inhibition of pectin modification	AT3G20820
Vitvi06g00184	1999.09	-1.29335	0.237911	-5.43627	5.44e-08	6.36e-07	Acetyl-CoA carboxylase, biotin carboxylase	Metabolism.Primary metabolism.Lipid metabolism.Fatty acid metabolism.Fatty acid biosynthesis	AT5G12950
Vitvi06g00210	135.094	3.48515	1.4123	2.46772	0.0135978	0.0377779	Aldehyde dehydrogenase 3B1	Metabolism.Primary metabolism.Carbohydrate metabolism.Glycolysis Gluconeogenesis	AT4G36250
Vitvi06g00213	458.945	1.01886	0.227969	4.46931	7.85e-06	5.71e-05	3-beta-hydroxysteroid-delta-isomerase	Metabolism.Primary metabolism.Lipid metabolism.Steroid metabolism.Steroid biosynthesis	AT1G20050
Vitvi06g00214	42.6443	4.89362	1.02455	4.77635	1.79e-06	1.5e-05	Myb domain protein 83	Regulation overview.Regulation of gene expression.Regulation of transcription.Transcription factor.MYB family transcription factor	AT3G08500
Vitvi06g00233	1308.83	1.14665	0.271015	4.23096	2.33e-05	0.000149304	Cinnamyl alcohol dehydrogenase	Metabolism.Secondary metabolism.Phenylpropanoid metabolism.Phenylpropanoid biosynthesis	AT5G19440
Vitvi06g00234	609.179	1.0677	0.176923	6.03482	1.59e-09	2.54e-08	Triacylglycerol lipase	Metabolism.Primary metabolism.Lipid metabolism.Glycerolipid metabolism.Glycerolipid catabolism	AT1G51440
Vitvi06g00242	23.4535	2.36124	0.953044	2.47758	0.0132278	0.0369382	ABC transporter G member 1	Transport overview.Macromolecule transport.Multidrug transport.Multidrug ABC transport	AT5G60740
Vitvi06g00250	159.052	-2.57619	0.976975	-2.6369	0.00836665	0.0252171	Carbonic anhydrase	Metabolism.Cellular metabolism.Nitrogen and sulfur metabolism.Nitrogen metabolism	AT1G08080
Vitvi06g00256	5467.85	1.62269	0.409728	3.96041	7.48e-05	0.000420647	Phenylalanine ammonia-lyase	Metabolism.Primary metabolism.Amino acid metabolism.Aromatic amino acid metabolism.Tyrosine metabolism	AT2G37040
Vitvi06g00262	558.757	1.94022	0.373701	5.19189	2.08e-07	2.17e-06	Cyclic nucleotide-gated ion channel 15	Response to stimulus.Stress response.Biotic stress response.Plant-pathogen interaction	AT2G28260
Vitvi06g00263	158.087	1.27246	0.506505	2.51223	0.0119971	0.0340797	Lysine decarboxylase	Metabolism.Primary metabolism.Amino acid metabolism.Lysine metabolism	AT2G28305
Vitvi06g00268	156.014	1.80502	0.510517	3.53566	0.00040675	0.00186455	Drug/metabolite transporter DMT family transporter	Transport overview.Electrochemical Potential-driven Transporters.Porters.Drug/Metabolite Transporter	AT1G06890
Vitvi06g00269	662.991	1.00753	0.327326	3.07807	0.00208348	0.00769201	Pleckstriny (PH) domain-containing protein	Unclear	AT2G28320
Vitvi06g00281	2082.81	5.54767	0.416413	13.3225	1.71e-40	7.92e-38	Aquaporin PIP2B	Transport overview.Channels and pores.a-Type channels.Major Intrinsic Protein	AT2G37170
Vitvi06g00283	199.22	1.10378	0.320706	3.44172	0.000578029	0.00253912	Receptor-like kinase	Signaling.Signaling pathway.Protein kinase	AT3G26700
Vitvi06g00288	153.371	1.08017	0.276249	3.91013	9.22e-05	0.000507904	YrdC	Regulation overview.Regulation of gene expression.Regulation of translation	AT5G60590
Vitvi06g00290	3426.6	-1.18315	0.172108	-6.87448	6.22e-12	1.46e-10	Zinc finger (CCCH-type) family protein	Regulation overview.Regulation of gene expression.Regulation of transcription.Transcription factor.C3H family transcription factor	AT2G28450
Vitvi06g00303	451.489	3.80461	0.487909	7.79779	6.3e-15	2.29e-13	fasciclin arabinogalactan-protein (FLA11)	Cellular process.Cellular component organization and biogenesis.Cell wall organization and biogenesis.Cell wall structural protein
Vitvi06g00309	58.8124	3.43572	0.75637	4.54238	5.56e-06	4.16e-05	Unknown	Unknown
Vitvi06g00310	52.4881	3.24377	0.985611	3.29112	0.00099789	0.00406694	MLO-like protein 3	Cellular process.Cell growth and death.Cell death	AT3G45290
Vitvi06g00323	7.63786	-6.59235	1.95835	-3.36628	0.00076189	0.00322103	Cupin family protein	Metabolism.Primary metabolism.Generation of metabolite precursors and energy.Storage proteins	AT2G28490
Vitvi06g00336	886.507	2.37772	0.352925	6.73718	1.61e-11	3.51e-10	Lateral organ boundaries protein 11	Regulation overview.Regulation of gene expression.Regulation of transcription.Transcription factor.AS2 family transcription factor	AT2G28500
Vitvi06g00340	973.458	-1.60584	0.230543	-6.96545	3.27e-12	8e-11	Unknown protein	Unknown
Vitvi06g00345	916.481	3.55059	0.202202	17.5597	5.02e-69	3.06e-65	Dof zinc finger protein DOF5.3	Regulation overview.Regulation of gene expression.Regulation of transcription.Transcription factor.C2C2-DOF family transcription factor	AT5G60200
Vitvi06g00350	65.687	2.42142	0.425712	5.68793	1.29e-08	1.72e-07	Unknown protein	Unknown	AT5G60150
Vitvi06g00358	35935	1.10878	0.22156	5.0044	5.6e-07	5.33e-06	L-ascorbate peroxidase.	Metabolism.Primary metabolism.Organic acid metabolism.Ascorbate and aldarate metabolism
Vitvi06g00374	314.517	3.09217	0.731895	4.22488	2.39e-05	0.000152828	Phototropin-1	Transport overview.Channels and pores.a-Type channels.The Voltage-gated Ion Channel	AT3G45780
Vitvi06g00378	37.7346	8.49466	1.2132	7.00186	2.53e-12	6.35e-11	Laccase	Metabolism.single reactions	AT5G60020
Vitvi06g00379	469.667	2.86946	0.533094	5.38265	7.34e-08	8.39e-07	Embryo-specific protein	Unclear
Vitvi06g00383	701.085	3.1356	0.248343	12.6261	1.52e-36	5.24e-34	Kinesin motor protein	Cellular process.Cellular component organization and biogenesis.Cytoskeleton organization and biogenesis.Microtubule organization and biogenesis.Microtubule-driven movement	AT3G45850
Vitvi06g00393	241.261	2.67099	0.445799	5.99147	2.08e-09	3.24e-08	Ankyrin	Transport overview.Accessory factors involved in transport.Auxiliary transport proteins.Ankyrin	AT1G07710
Vitvi06g00405	35.9605	7.45616	1.19885	6.21943	4.99e-10	8.6e-09	Laccase	Metabolism.single reactions	AT5G60020
Vitvi06g00411	53.9576	3.18227	1.12066	2.83964	0.00451643	0.0149324	Unknown protein	Unknown	AT2G28690
Vitvi06g00412	1115.68	5.19189	1.17721	4.41034	1.03e-05	7.27e-05	Aquaporin TIP1;3	Transport overview.Channels and pores.a-Type channels.Major Intrinsic Protein	AT4G01470
Vitvi06g00413	210.777	2.98663	0.431579	6.92024	4.51e-12	1.08e-10	Protein tyrosine phosphatase protein (PAS2)	Signaling.Signaling pathway.Protein phosphatase	AT5G59770
Vitvi06g00417	172.524	2.19316	0.330141	6.64308	3.07e-11	6.46e-10	Methyl-CpG-binding domain-containing protein	Metabolism.Primary metabolism.Nucleobase, nucleoside, nucleotide, nucleic acid metabolism.Nucleic acid metabolism.DNA metabolism	AT5G59800
Vitvi06g00421	71.0721	-1.40653	0.387886	-3.62616	0.000287672	0.00137657	No hit	No hit
Vitvi06g00423	1632.15	2.49702	0.215507	11.5867	4.81e-31	1.06e-28	Histone H2A.4 HTA12	Cellular process.Cellular component organization and biogenesis.Nucleus.Chromosome organization and biogenesis.Chromatin assembly	AT5G02560
Vitvi06g00433	898.381	4.07714	0.333463	12.2267	2.24e-34	6.54e-32	Histone H4	Cellular process.Cellular component organization and biogenesis.Nucleus.Chromosome organization and biogenesis.Chromatin assembly	AT5G59970
Vitvi06g00434	212.623	-1.99567	0.364107	-5.481	4.23e-08	5.07e-07	Unknown protein	Unknown	AT5G59613
Vitvi06g00436	141.6	-2.62586	1.01288	-2.59248	0.00952871	0.0280925	Nitric-oxide reductase, cytochrome b-containing subunit I	Metabolism.Cellular metabolism.Nitrogen and sulfur metabolism.Nitrogen metabolism	AT2G28780
Vitvi06g00440	15532.2	-1.16668	0.256458	-4.5492	5.38e-06	4.04e-05	Osmotin	Response to stimulus.Stress response.Abiotic stress response.Osmotic stress response	AT2G28790
Vitvi06g00447	912.485	1.90412	0.282489	6.74049	1.58e-11	3.44e-10	Unknown protein	Unknown	AT5G59350
Vitvi06g00452	230.84	2.30685	0.387032	5.96035	2.52e-09	3.86e-08	Unknown protein	Unknown	AT5G02440
Vitvi06g00455	235.263	-1.62129	0.522612	-3.10229	0.00192031	0.00717165	Epsin N-terminal homology (ENTH) domain-containing	Transport overview.Macromolecule transport.Protein transport.Protein coat	AT3G46540
Vitvi06g00459	592.864	1.98578	0.274986	7.2214	5.15e-13	1.42e-11	fasciclin arabinogalactan-protein (FLA4)	Cellular process.Cellular component organization and biogenesis.Cell wall organization and biogenesis.Cell wall structural protein	AT3G46550
Vitvi06g00463	1708.71	1.54643	0.645078	2.39728	0.0165174	0.0444736	Metallothionein 2b	Cellular process.Cellular homeostasis.Heavy metal ion homeostasis
Vitvi06g00465	40689.1	-2.19151	0.252142	-8.69156	3.58e-18	1.91e-16	Outer envelope protein 16	Transport overview.Channels and pores.√ü-Barrel porins.Plastid Outer Envelope Porin of 16 kDa	AT2G28900
Vitvi06g00471	460.115	-2.08298	0.496946	-4.19156	2.77e-05	0.000174428	MBD5 (methyl-CpG-binding domain 5)	Metabolism.Primary metabolism.Nucleobase, nucleoside, nucleotide, nucleic acid metabolism.Nucleic acid metabolism.DNA metabolism
Vitvi06g00481	8436.08	5.10769	0.586076	8.71507	2.91e-18	1.58e-16	Alpha-expansin 6 precursor	Signaling.Hormone Signaling.Auxin Signaling.Auxin-mediated Signaling pathway	AT2G39700
Vitvi06g00505	1757.21	-1.60883	0.192238	-8.36891	5.82e-17	2.75e-15	ARR1 typeB	Signaling.Hormone Signaling.Cytokinin Signaling.Cytokinin-mediated Signaling pathway	AT3G46640
Vitvi06g00513	5459.88	3.22099	0.596962	5.39564	6.83e-08	7.83e-07	Ribulose bisphosphate carboxylase/oxygenase activase, chloroplast	Metabolism.Primary metabolism.Generation of metabolite precursors and energy.Photosynthesis.Calvin cycle	AT2G39730
Vitvi06g00517	1923.46	2.01565	0.314519	6.40868	1.47e-10	2.75e-09	Plastid transcriptionally active18	Transport overview.Primary Active Transporters.P-P-bond hydrolysis-driven transporters.Chloroplast Env Prot Translocase	AT3G46780
Vitvi06g00518	54.6767	1.78477	0.500018	3.56942	0.000357774	0.00166936	Ethylene receptor (ETR2)	Signaling.Hormone Signaling.Ethylene Signaling.Ethylene-mediated Signaling pathway	AT3G23150
Vitvi06g00525	119.021	2.18827	0.385121	5.68202	1.33e-08	1.77e-07	Tropinone reductase	Metabolism.Primary metabolism.Amino acid metabolism.Arginine and proline metabolism.Urea cycle	AT2G29260
Vitvi06g00533	4019.94	-1.84803	0.338847	-5.45388	4.93e-08	5.81e-07	Protein phosphatase 2C DBP	Signaling.Hormone Signaling.ABA Signaling.ABA-mediated Signaling pathway	AT5G59220
Vitvi06g00544	148.618	-1.42554	0.348766	-4.08738	4.36e-05	0.000261262	Subtilase	Metabolism.Primary metabolism.Protein metabolism and modification.Proteolysis.Peptidase-mediated proteolysis.Subtilase-mediated proteolysis
Vitvi06g00561	70235.8	-4.34321	0.776338	-5.59448	2.21e-08	2.83e-07	Heat shock protein 17.6 kDa class I	Metabolism.Primary metabolism.Protein metabolism and modification.Protein folding.Chaperone-mediated protein folding.HSP-mediated protein folding	AT2G29500
Vitvi06g00567	385.167	-1.23359	0.249402	-4.94617	7.57e-07	7e-06	Zinc finger (C3HC4-type ring finger)	Regulation overview.Regulation of gene expression.Regulation of transcription.Transcription factor.Zinc finger C3HC4 family transcription factor	AT5G05830
Vitvi06g00569	967.478	4.92452	0.386856	12.7296	4.05e-37	1.48e-34	Tubulin beta-3 chain	Cellular process.Cellular component organization and biogenesis.Cytoskeleton organization and biogenesis.Microtubule organization and biogenesis	AT5G62700
Vitvi06g00576	1250.16	1.7172	0.148914	11.5315	9.15e-31	1.9e-28	Proliferating cell nuclear antigen (PCNA)	Metabolism.Primary metabolism.Nucleobase, nucleoside, nucleotide, nucleic acid metabolism.Nucleic acid metabolism.DNA metabolism.DNA replication	AT2G29570
Vitvi06g00579	12440.9	-1.48584	0.131372	-11.3102	1.17e-29	2.21e-27	Unknown protein	Unknown	AT4G37300
Vitvi06g00582	17022.9	-1.10002	0.208695	-5.27094	1.36e-07	1.47e-06	Transformer serine/arginine-rich ribonucleoprotein	Metabolism.Primary metabolism.Nucleobase, nucleoside, nucleotide, nucleic acid metabolism.Nucleic acid metabolism.RNA metabolism.RNA processing.mRNA processing.mRNA splicing	AT1G07350
Vitvi06g00583	7198.59	-1.64736	0.15994	-10.2999	7.06e-25	8.24e-23	Alpha-glucan phosphorylase, H isozyme	Metabolism.Primary metabolism.Carbohydrate metabolism.Polysaccharide metabolism.Starch and sucrose metabolism.Starch biosynthesis catabolism.Starch catabolism	AT3G46970
Vitvi06g00589	797.51	-1.2277	0.197365	-6.22043	4.96e-10	8.55e-09	Unknown protein	Unknown	AT5G58920
Vitvi06g00607	1389.11	2.59098	0.276881	9.35774	8.15e-21	5.95e-19	Zinc finger (C2H2 type) family	Regulation overview.Regulation of gene expression.Regulation of transcription.Transcription factor.C2H2 family transcription factor	AT2G29660
Vitvi06g00614	140.768	3.43293	0.518711	6.6182	3.64e-11	7.53e-10	Cell division cycle 6	Cellular process.Cell growth and death	AT2G29680
Vitvi06g00622	71.5886	1.61777	0.482675	3.35167	0.00080326	0.00337614	UDP-glucose: anthocyanidin 5,3-O-glucosyltransferase	Metabolism.Secondary metabolism.Phenylpropanoid metabolism.Flavonoid metabolism.Flavonoid biosynthesis.Anthocyanin biosynthesis.Anthocyanin-glycoside biosynthesis	AT1G07250
Vitvi06g00626	300.334	3.29237	0.75965	4.33407	1.46e-05	9.9e-05	Receptor ser/thr protein kinase	Signaling.Signaling pathway.Protein kinase	AT3G09010
Vitvi06g00637	194.703	1.28112	0.447373	2.86365	0.00418787	0.0140142	ABC transporter G member 23	Transport overview.Macromolecule transport.Multidrug transport.Multidrug ABC transport	AT2G29940
Vitvi06g00639	1677.57	9.96195	1.10285	9.03293	1.67e-19	1.05e-17	Calcium/proton exchanger CAX3	Transport overview.Electrochemical Potential-driven Transporters.Porters.Ca2+:Cation Antiporter	AT3G51860
Vitvi06g00647	338.574	-1.98117	0.284274	-6.96923	3.19e-12	7.83e-11	1-phosphatidylinositol-4,5-bisphosphate phosphodiesterase	Metabolism.Primary metabolism.Carbohydrate metabolism.Monosaccharide metabolism.Inositol phosphate metabolism	AT5G58700
Vitvi06g00649	162.735	2.54855	0.695764	3.66296	0.000249317	0.00121171	Phosphoinositide-specific phospholipase C	Metabolism.Primary metabolism.Carbohydrate metabolism.Monosaccharide metabolism.Inositol phosphate metabolism	AT3G08510
Vitvi06g00650	30.1447	8.17025	1.36825	5.97133	2.35e-09	3.63e-08	ACR4 (Arabidopsis CRINKLY4)	Signaling.Signaling pathway.Calcium sensors and Signaling	AT3G55950
Vitvi06g00656	95.8555	2.56186	0.609691	4.2019	2.65e-05	0.000167334	Microsomal omega-3 fatty acid desaturase	Metabolism.Primary metabolism.Lipid metabolism.Fatty acid metabolism.Fatty acid biosynthesis.Unsaturated fatty acid biosynthesis	AT5G05580
Vitvi06g00659	1593.44	-3.95209	0.899617	-4.39308	1.12e-05	7.8e-05	Gibberellin 2-beta-dioxygenase 7	Metabolism.Secondary metabolism.Terpenoid metabolism.Diterpenoid metabolism.Diterpenoid biosynthesis	AT5G58660
Vitvi06g00666	2983.56	-2.62807	0.818559	-3.2106	0.00132458	0.00519932	Asparagine synthetase	Metabolism.Cellular metabolism.Nitrogen and sulfur metabolism.Nitrogen metabolism.Nitrogen assimilation	AT3G47340
Vitvi06g00673	10.0265	3.72003	1.38387	2.68815	0.00718499	0.0221993	Pyruvate decarboxylase isozyme 1	Metabolism.Primary metabolism.Carbohydrate metabolism.Glycolysis Gluconeogenesis	AT4G33070
Vitvi06g00674	139.123	2.49062	0.392237	6.34978	2.16e-10	3.93e-09	Unknown protein	Unknown	AT1G07120
Vitvi06g00679	1832.84	1.00961	0.411271	2.45487	0.0140936	0.0389393	N-acetyltransferase hookless1 HLS1	Signaling.Hormone Signaling.Ethylene Signaling.Ethylene-mediated Signaling pathway	AT2G30090
Vitvi06g00689	75.961	1.41631	0.358196	3.95402	7.68e-05	0.000430764	MRH1 (morphogenesis of root hair 1)	Signaling.Signaling pathway.Protein kinase	AT4G18640
Vitvi06g00690	6.10727	4.3311	1.36747	3.16722	0.00153903	0.00591519	Glutaredoxin	Response to stimulus.Stress response.Abiotic stress response.Oxidative stress response
Vitvi06g00693	758.245	1.78961	0.23548	7.59985	2.96e-14	9.81e-13	Protein kinase	Signaling.Signaling pathway.Protein kinase	AT5G58520
Vitvi06g00699	21156.1	-2.96612	0.336737	-8.80841	1.27e-18	7.27e-17	Cinnamoyl-CoA reductase	Metabolism.Secondary metabolism.Phenylpropanoid metabolism.Phenylpropanoid biosynthesis	AT5G58490
Vitvi06g00715	193.549	2.05951	0.489214	4.20984	2.56e-05	0.000162104	Indole-3-acetate beta-glucosyltransferase	Signaling.Hormone Signaling.Auxin Signaling.Auxin metabolism.Auxin inactivation by conjugation	AT2G30150
Vitvi06g00758	3261.14	1.56517	0.515233	3.03778	0.00238326	0.00861466	Taxadien-5-alpha-ol-O-acetyltransferase	Metabolism.Secondary metabolism.Terpenoid metabolism.Diterpenoid metabolism.Diterpenoid biosynthesis.Taxol biosynthesis	AT2G25150
Vitvi06g00759	965.449	-1.43188	0.206205	-6.94398	3.81e-12	9.22e-11	Alanine--glyoxylate aminotransferase 2 2, mitochondrial	Metabolism.Primary metabolism.Amino acid metabolism.Alanine and aspartate metabolism	AT3G08860
Vitvi06g00761	165.031	5.71327	1.57657	3.62386	0.000290235	0.00138775	Nodulin	Response to stimulus.Stress response.Biotic stress response	AT2G30300
Vitvi06g00768	4092.92	-4.09134	1.07864	-3.79305	0.00014881	0.000771702	Cationic peroxidase 1 precursor	Metabolism.Primary metabolism.Amino acid metabolism.Aromatic amino acid metabolism.Phenylalanine metabolism.Phenylalanine biosynthesis	AT5G05340
Vitvi06g00775	2469.51	-1.26311	0.184049	-6.86293	6.75e-12	1.57e-10	SOS2 (salt overly sensitive 2)	Signaling.Hormone Signaling.ABA Signaling.ABA-mediated Signaling pathway	AT5G58380
Vitvi06g00790	7.5239	6.16573	1.64201	3.75499	0.000173351	0.000879813	Alpha-expansin 10 precursor	Signaling.Hormone Signaling.Auxin Signaling.Auxin-mediated Signaling pathway	AT2G40610
Vitvi06g00800	371.954	1.41965	0.237352	5.9812	2.22e-09	3.43e-08	BZIP transcription factor, putative (bZIP52)	Regulation overview.Regulation of gene expression.Regulation of transcription.Transcription factor.bZIP family transcription factor	AT1G06850
Vitvi06g00801	5742.29	-1.11284	0.107017	-10.3988	2.51e-25	3.01e-23	Zinc finger (C3HC4-type ring finger)	Regulation overview.Regulation of gene expression.Regulation of transcription.Transcription factor.Zinc finger C3HC4 family transcription factor	AT3G10910
Vitvi06g00812	1130.66	1.05851	0.197824	5.35074	8.76e-08	9.87e-07	Receptor protein kinase	Signaling.Signaling pathway.Protein kinase	AT5G58300
Vitvi06g00814	4423.71	1.15652	0.180626	6.40281	1.53e-10	2.85e-09	Root phototropism protein 2	Signaling.Signaling pathway.Light Signaling	AT2G30520
Vitvi06g00819	1278.1	-1.50008	0.16462	-9.1124	8.06e-20	5.27e-18	Leucine-rich repeat transmembrane protein kinase, putative	Signaling.Signaling pathway.Protein kinase	AT1G06840
Vitvi06g00896	427.324	1.17446	0.1914	6.13615	8.45e-10	1.41e-08	OEP80 (outer envelope protein of 80 kda)	Transport overview.Channels and pores.√ü-Barrel porins.Outer Membrane Protein Insertion Porin	AT3G44160
Vitvi06g00906	59.8749	6.24385	0.89359	6.98738	2.8e-12	6.98e-11	U-box protein	Unknown	AT2G35930
Vitvi06g00915	140.534	2.43589	0.745327	3.26821	0.00108229	0.0043542	U-box domain-containing protein	Unknown	AT3G11840
Vitvi06g00928	92.2037	1.68292	0.512184	3.28576	0.00101706	0.00413312	Aluminium-tolerance ALMT1	Transport overview.Electrochemical Potential-driven Transporters.Porters.Aromatic Acid Exporter	AT1G08440
Vitvi06g00962	4074.2	1.16486	0.350503	3.32339	0.000889298	0.00367356	Periplasmic beta-glucosidase precursor	Metabolism.Cellular metabolism.Amino acid derivative metabolism.Cyanoamino acid metabolism	AT5G20950
Vitvi06g00964	381.443	2.42159	0.205765	11.7687	5.66e-32	1.35e-29	Kinesin motor protein	Cellular process.Cellular component organization and biogenesis.Cytoskeleton organization and biogenesis.Microtubule organization and biogenesis.Microtubule-driven movement	AT3G44050
Vitvi06g00984	298.734	1.91162	0.551077	3.46888	0.000522631	0.0023245	CXE carboxylesterase	Metabolism.Cellular metabolism.Esterase activity	AT5G06570
Vitvi06g00999	729.538	3.43728	0.677521	5.07332	3.91e-07	3.83e-06	Cation exchanger (CAX7)	Transport overview.Electrochemical Potential-driven Transporters.Porters.Ca2+:Cation Antiporter	AT5G17860
Vitvi06g01003	51.6505	1.11124	0.466627	2.38142	0.0172459	0.0461364	NADH dehydrogenase subunit 2	Metabolism.Primary metabolism.Generation of metabolite precursors and energy.Electron transport.Respiratory-chain phosphorylation
Vitvi06g01057	177.056	2.09674	0.547491	3.82973	0.000128282	0.000678445	Receptor protein kinase	Signaling.Signaling pathway.Protein kinase	AT2G27060
Vitvi06g01097	12.7932	4.32801	1.55591	2.78166	0.00540818	0.0174297	Anthocyanin 3-O-galactosyltransferase	Metabolism.Secondary metabolism.Phenylpropanoid metabolism.Flavonoid metabolism.Flavonoid biosynthesis.Anthocyanin biosynthesis.Anthocyanin-glycoside biosynthesis	AT5G17050
Vitvi06g01100	6.71934	5.50495	1.62307	3.39169	0.000694635	0.00297671	Anthocyanin 3-O-galactosyltransferase	Metabolism.Secondary metabolism.Phenylpropanoid metabolism.Flavonoid metabolism.Flavonoid biosynthesis.Anthocyanin biosynthesis.Anthocyanin-glycoside biosynthesis	AT5G17050
Vitvi06g01106	3.28233	4.97117	1.68416	2.95172	0.00316012	0.0109851	Cyclin CYCB1_2	Cellular process.Cell growth and death	AT5G06150
Vitvi06g01116	21.457	4.23204	0.981274	4.3128	1.61e-05	0.000107916	Ankyrin repeat	Regulation overview.Regulation of gene expression.Regulation of transcription.Transcription factor.C3H family transcription factor
Vitvi06g01139	177.303	-1.03372	0.194081	-5.32621	1e-07	1.12e-06	Myb domain protein 65	Regulation overview.Regulation of gene expression.Regulation of transcription.Transcription factor.MYB family transcription factor	AT3G11440
Vitvi06g01152	35.6281	-4.762	1.11754	-4.26115	2.03e-05	0.000132782	Pectinesterase family	Cellular process.Cellular component organization and biogenesis.Cell wall organization and biogenesis.Cell wall metabolism.Cell wall modification.Pectin modification	AT2G45220
Vitvi06g01162	733.145	-1.24835	0.191211	-6.52865	6.64e-11	1.31e-09	Unknown	Unknown
Vitvi06g01166	309.873	1.78788	0.265131	6.74339	1.55e-11	3.38e-10	DUTP pyrophosphatase	Metabolism.Primary metabolism.Nucleobase, nucleoside, nucleotide, nucleic acid metabolism.Nucleotide metabolism.Pyrimidine metabolism	AT3G46940
Vitvi06g01183	80.3157	1.14922	0.433832	2.64901	0.00807288	0.0244801	Flavonoid 3',5'-hydroxylase	Metabolism.Secondary metabolism.Phenylpropanoid metabolism.Flavonoid metabolism.Flavonoid biosynthesis
Vitvi06g01192	24.3083	3.49814	0.940302	3.72023	0.000199041	0.000993142	Flavonoid 3',5'-hydroxylase	Metabolism.Secondary metabolism.Phenylpropanoid metabolism.Flavonoid metabolism.Flavonoid biosynthesis	AT5G07990
Vitvi06g01218	649.085	1.26543	0.307892	4.10998	3.96e-05	0.000240365	No hit	No hit
Vitvi06g01226	172.203	3.83679	0.752321	5.09994	3.4e-07	3.38e-06	Phosphatidylglycerol specific phospholipase C	Metabolism.Primary metabolism.Amino acid metabolism.Glycine, serine, and threonine metabolism	AT2G26870
Vitvi06g01227	358.841	1.02322	0.266152	3.84449	0.000120801	0.00064374	Unknown protein	Unknown	AT5G13500
Vitvi06g01233	144.159	1.45581	0.603415	2.41262	0.0158382	0.0429419	No hit	No hit
Vitvi06g01251	467.531	1.48341	0.269803	5.49813	3.84e-08	4.67e-07	CYP86A2	Metabolism.Cellular metabolism.Oxidation reduction.Cytochrome P450 oxidoreductase	AT3G56630
Vitvi06g01255	671.094	-1.85306	0.324101	-5.71753	1.08e-08	1.47e-07	F-box family protein	Metabolism.Primary metabolism.Protein metabolism and modification.Proteolysis.cytoplasmic and nuclear protein degradation.Ubiquitin-mediated proteolysis	AT4G18380
Vitvi06g01261	1625.68	2.17931	0.569836	3.82446	0.000131058	0.000690595	No hit	No hit
Vitvi06g01275	428.984	5.36242	0.6404	8.37355	5.59e-17	2.66e-15	Ubiquitin-conjugating enzyme E2 C	Metabolism.Primary metabolism.Protein metabolism and modification.Proteolysis.cytoplasmic and nuclear protein degradation.Ubiquitin-mediated proteolysis	AT1G50490
Vitvi06g01276	91.9805	1.89432	0.708445	2.67391	0.00749733	0.022982	Saccharopine dehydrogenase	Metabolism.Primary metabolism.Amino acid metabolism.Lysine metabolism	AT1G50450
Vitvi06g01281	1371.04	1.48474	0.242293	6.1279	8.9e-10	1.48e-08	Zinc finger (CCCH-type) family protein	Regulation overview.Regulation of gene expression.Regulation of transcription.Transcription factor.C3H family transcription factor	AT3G51950
Vitvi06g01282	64.2722	1.51089	0.530007	2.8507	0.00436226	0.0144985	R protein MLA10	Response to stimulus.Stress response.Biotic stress response.Plant-pathogen interaction.R proteins from Plant-pathogen interaction	AT3G14470
Vitvi06g01286	1446.31	-1.16708	0.140627	-8.29915	1.05e-16	4.83e-15	Transcription initiation factor TFIIB	Metabolism.Primary metabolism.Nucleobase, nucleoside, nucleotide, nucleic acid metabolism.Nucleic acid metabolism.RNA metabolism.Basal transcription factors	AT3G10330
Vitvi06g01313	42751.2	-1.00106	0.204328	-4.89927	9.62e-07	8.69e-06	ABC transporter F member 2	Transport overview.Macromolecule transport.Multidrug transport.Multidrug ABC transport	AT5G60790
Vitvi06g01321	331.603	1.32975	0.508985	2.61254	0.00898713	0.0267953	Myb domain protein 36	Regulation overview.Regulation of gene expression.Regulation of transcription.Transcription factor.MYB family transcription factor	AT5G57620
Vitvi06g01334	403.888	2.24896	0.362732	6.20005	5.64e-10	9.65e-09	Nodulin family protein	Metabolism.Cellular metabolism.Nitrogen and sulfur metabolism.Nitrogen metabolism.Nitrogen assimilation	AT2G28120
Vitvi06g01340	1831.89	4.00403	0.240547	16.6456	3.26e-62	7.99e-59	Unknown protein	Unknown	AT3G44940
Vitvi06g01346	2762.25	4.64818	0.375951	12.3638	4.1e-35	1.31e-32	Aquaporin GAMMA-TIP3/TIP1;3	Transport overview.Channels and pores.a-Type channels.Major Intrinsic Protein	AT4G01470
Vitvi06g01357	400.121	3.80457	0.680009	5.59488	2.21e-08	2.82e-07	Harpin-induced protein	Response to stimulus.Stress response.Biotic stress response.Virus stress response	AT5G22870
Vitvi06g01364	5081.28	-1.18217	0.231366	-5.10955	3.23e-07	3.23e-06	Vacuolar protein sorting 41 (VPS41)	Transport overview.Macromolecule transport.Protein transport.Protein coat	AT1G08190
Vitvi06g01374	11.4148	4.09813	1.65699	2.47323	0.0133896	0.0372797	Prolylcarboxypeptidase	Metabolism.Primary metabolism.Protein metabolism and modification.Proteolysis.Peptidase proteins	AT5G22860
Vitvi06g01383	316.375	1.50767	0.356255	4.23201	2.32e-05	0.000148687	Magnesium transporter CorA 10	Transport overview.Channels and pores.a-Type channels.CorA Metal Ion Transporter	AT5G22830
Vitvi06g01404	1787.48	1.33752	0.277565	4.81876	1.44e-06	1.24e-05	Nucleobase-ascorbate transporter 12 (NAT12)	Transport overview.Electrochemical Potential-driven Transporters.Porters.Nucleobase:Cation Symporter-2	AT2G27810
Vitvi06g01408	127.589	2.09068	0.659384	3.17065	0.00152097	0.00585313	Unknown protein	Unknown	AT2G27770
Vitvi06g01409	299.171	1.13125	0.227774	4.96652	6.82e-07	6.36e-06	Unknown protein	Unknown	AT3G44716
Vitvi06g01410	623.258	4.49736	0.458024	9.81906	9.32e-23	8.34e-21	Pop3 peptide	Response to stimulus.Stress response.Biotic stress response	AT5G22580
Vitvi06g01411	54.0024	7.18444	1.40769	5.10369	3.33e-07	3.32e-06	CBF transcription factor	Signaling.Hormone Signaling.Ethylene Signaling.Ethylene-mediated Signaling pathway	AT4G25490
Vitvi06g01430	504.654	2.26734	0.310824	7.29461	3e-13	8.63e-12	PINOID	Signaling.Hormone Signaling.Auxin Signaling.Auxin transport	AT2G34650
Vitvi06g01454	368.749	2.53079	0.740898	3.41585	0.000635835	0.00275749	CYP94A1	Metabolism.Cellular metabolism.Oxidation reduction.Cytochrome P450 oxidoreductase	AT2G27690
Vitvi06g01469	1213.1	1.5105	0.128279	11.7751	5.24e-32	1.26e-29	Sialyltransferase	Metabolism.Primary metabolism.Lipid metabolism.Sphingolipid metabolism.Glycosphingolipid metabolism.Glycosphingolipid biosynthesis	AT1G08280
Vitvi06g01470	55.5995	2.03541	0.799439	2.54605	0.0108948	0.0314103	Seed maturation protein PM38	Response to stimulus.Stress response.Biotic stress response	AT5G22470
Vitvi06g01489	4725.12	1.0502	0.345508	3.03959	0.00236902	0.00857201	Glucan endo-1,3-beta-glucosidase 7 precursor	Metabolism.Primary metabolism.Carbohydrate metabolism.Polysaccharide metabolism.Starch and sucrose metabolism	AT2G27500
Vitvi06g01516	2069.85	1.3149	0.289354	4.54426	5.51e-06	4.13e-05	MYB divaricata	Development.Reproductive development.Flower development	AT5G04760
Vitvi06g01518	757.726	1.73038	0.337231	5.13115	2.88e-07	2.92e-06	Lycopene beta cyclase (LYC)	Metabolism.Secondary metabolism.Terpenoid metabolism.Tetraterpenoid metabolism.Tetraterpenoid biosynthesis.Carotenoid biosynthesis	AT3G10230
Vitvi06g01530	132.771	1.37918	0.423696	3.25513	0.00113342	0.00453238	F-box family protein	Metabolism.Primary metabolism.Protein metabolism and modification.Proteolysis.cytoplasmic and nuclear protein degradation.Ubiquitin-mediated proteolysis	AT2G27310
Vitvi06g01531	1872.62	2.63227	0.485938	5.41688	6.06e-08	7.03e-07	Photosystem I subunit O (PSAO)	Metabolism.Primary metabolism.Generation of metabolite precursors and energy.Photosynthesis.Photosystem I	AT1G08380
Vitvi06g01539	51.79	-3.03558	1.17132	-2.59159	0.00955328	0.0281514	Secoisolariciresinol dehydrogenase	Metabolism.Secondary metabolism.Phenylpropanoid metabolism.Phenylpropanoid biosynthesis	AT3G51680
Vitvi06g01540	153.276	3.43718	0.636623	5.39908	6.7e-08	7.7e-07	Secoisolariciresinol dehydrogenase	Metabolism.Secondary metabolism.Phenylpropanoid metabolism.Phenylpropanoid biosynthesis	AT3G51680
Vitvi06g01559	370.927	1.4188	0.326976	4.33915	1.43e-05	9.7e-05	Harpin-induced family protein	Response to stimulus.Stress response.Biotic stress response.Virus stress response	AT3G44220
Vitvi06g01574	212.863	4.15902	0.949247	4.38139	1.18e-05	8.17e-05	WRKY DNA-binding protein 48	Regulation overview.Regulation of gene expression.Regulation of transcription.Transcription factor.WRKY family transcription factor
Vitvi06g01593	42.8506	8.67822	1.14159	7.60188	2.92e-14	9.69e-13	Unknown	Unknown
Vitvi06g01597	8786.61	1.04464	0.259949	4.01865	5.85e-05	0.000337898	Dirigent protein	Response to stimulus.Stress response.Biotic stress response	AT3G13650
Vitvi06g01599	2662.27	-1.26647	0.50973	-2.48459	0.01297	0.0363548	Dirigent protein pDIR9	Response to stimulus.Stress response.Biotic stress response	AT1G58170
Vitvi06g01601	2907.55	-2.99174	0.498768	-5.99826	1.99e-09	3.12e-08	Dirigent protein	Response to stimulus.Stress response.Biotic stress response	AT3G13650
Vitvi06g01606	529.729	-1.21324	0.312677	-3.88018	0.000104379	0.00056569	Calcineurin phosphoesterase	Unclassified	AT1G48120
Vitvi06g01608	1583.44	-3.04267	0.28605	-10.6368	2.01e-26	2.69e-24	GRIK1 (geminivirus rep interacting kinase 1)	Signaling.Signaling pathway.Protein kinase	AT3G45240
Vitvi06g01648	5.05465	5.5924	1.62785	3.43544	0.000591595	0.00258944	Kiwellin Ripening-related protein grip22	Unknown
Vitvi06g01658	49.0441	6.61303	1.16892	5.6574	1.54e-08	2.03e-07	Unknown protein	Unknown
Vitvi06g01665	587.344	1.76821	0.272806	6.48156	9.08e-11	1.75e-09	Myosin heavy chain	Cellular process.Cellular component organization and biogenesis.Cytoskeleton organization and biogenesis.Myosin-driven movement	AT5G60210
Vitvi06g01682	1037.05	-1.75977	0.469414	-3.74888	0.000177627	0.000898726	Zinc finger (C2H2 type) protein (ZAT11)	Regulation overview.Regulation of gene expression.Regulation of transcription.Transcription factor.C2H2 family transcription factor	AT2G37430
Vitvi06g01683	222.304	-2.33853	0.553084	-4.22815	2.36e-05	0.0001509	No hit	No hit
Vitvi06g01714	107.34	1.7867	0.701208	2.54803	0.0108332	0.0312547	Tropinone reductase	Metabolism.Primary metabolism.Amino acid metabolism.Arginine and proline metabolism.Urea cycle	AT2G29260
Vitvi06g01718	173.517	1.32181	0.398868	3.3139	0.000920034	0.00378142	Tropinone reductase	Metabolism.Primary metabolism.Amino acid metabolism.Arginine and proline metabolism.Urea cycle	AT2G29260
Vitvi06g01740	259.696	2.79453	0.783778	3.56546	0.000363218	0.00169251	Thylakoid soluble phosphoprotein	Unknown
Vitvi06g01743	4489.66	-1.03255	0.208864	-4.94365	7.67e-07	7.08e-06	UDP-glucose glucosyltransferase	Metabolism.Primary metabolism.Carbohydrate metabolism.Polysaccharide metabolism.Starch and sucrose metabolism	AT1G07250
Vitvi06g01744	184.15	2.90395	0.896906	3.23775	0.00120478	0.00477802	Anthocyanidin 3-O-glucosyltransferase	Metabolism.Secondary metabolism.Phenylpropanoid metabolism.Flavonoid metabolism.Flavonoid biosynthesis.Anthocyanin biosynthesis.Anthocyanin-glycoside biosynthesis	AT1G07250
Vitvi06g01751	540.933	1.12637	0.284713	3.95615	7.62e-05	0.000427441	NDA2 (alternative NAD(P)H dehydrogenase 2)	Metabolism.Primary metabolism.Generation of metabolite precursors and energy.Electron transport.Respiratory-chain phosphorylation	AT1G07180
Vitvi06g01752	84.5679	-4.2356	0.532062	-7.96072	1.71e-15	6.71e-14	No hit	No hit
Vitvi06g01760	403.377	1.13838	0.282421	4.03079	5.56e-05	0.000322736	Gamma interferon responsive lysosomal thiol reductase family protein	Unclear
Vitvi06g01776	158.111	1.88291	0.565505	3.32961	0.000869692	0.00360654	No hit	No hit
Vitvi06g01781	430.168	-1.23562	0.269132	-4.59115	4.41e-06	3.39e-05	No hit	No hit
Vitvi06g01816	44.2898	-1.95801	0.588113	-3.3293	0.000870634	0.00360861	No hit	No hit
Vitvi06g01821	465.012	4.07387	0.538906	7.55951	4.05e-14	1.33e-12	Heat shock HSP20 family protein	Metabolism.Primary metabolism.Protein metabolism and modification.Protein folding.Chaperone-mediated protein folding.HSP-mediated protein folding
Vitvi06g01830	799.151	1.28464	0.346514	3.70731	0.00020947	0.00103929	Protease inhibitor/seed storage/lipid transfer protein (LTP)	Transport overview.Macromolecule transport.Lipid transport	AT3G43720
Vitvi06g01844	1566.15	-1.3264	0.297615	-4.45676	8.32e-06	6e-05	No hit	No hit
Vitvi06g01878	84.4099	5.23211	0.916351	5.70972	1.13e-08	1.53e-07	Heat shock transcription factor B4	Metabolism.Primary metabolism.Protein metabolism and modification.Protein folding.Chaperone-mediated protein folding.HSP-mediated protein folding	AT1G46264
Vitvi06g01879	29.9421	-4.01007	0.703566	-5.69964	1.2e-08	1.62e-07	No hit	No hit
Vitvi06g01881	1009.32	-1.01619	0.216773	-4.68783	2.76e-06	2.23e-05	Unknown	Unknown
Vitvi06g01888	88.6996	-2.12691	0.451204	-4.71385	2.43e-06	1.99e-05	flavonoid 3',5'-hydroxylase [Vitis vinifera]	Metabolism.Secondary metabolism.Phenylpropanoid metabolism.Flavonoid metabolism.Flavonoid biosynthesis	AT5G07990
Vitvi06g01894	5.95851	5.83088	1.59537	3.65488	0.000257304	0.00124682	Flavonoid 3',5'-hydroxylase	Metabolism.Secondary metabolism.Phenylpropanoid metabolism.Flavonoid metabolism.Flavonoid biosynthesis
Vitvi06g01909	1888.25	-1.18349	0.133302	-8.87827	6.79e-19	3.98e-17	Unknown protein	Unknown	AT3G07910
Vitvi06g01924	112.137	2.09913	0.480734	4.36652	1.26e-05	8.69e-05	Serine carboxypeptidase precursor	Metabolism.Primary metabolism.Protein metabolism and modification.Proteolysis.Peptidase-mediated proteolysis	AT3G45010
Vitvi06g01927	54.9175	2.62462	0.848911	3.09175	0.00198978	0.00738834	Nodulin family protein	Metabolism.Primary metabolism.Protein metabolism and modification.Protein modification.Protein myristoylation	AT2G28120
Vitvi06g01928	205.638	2.56655	0.32042	8.00995	1.15e-15	4.61e-14	Short-chain dehydrogenase carbonyl reductase 3	Unclear	AT3G61220
Vitvi06g01945	3820.59	-2.02306	0.448339	-4.51234	6.41e-06	4.74e-05	No hit	No hit
Vitvi06g01950	338.114	-1.15855	0.36172	-3.20289	0.00136055	0.00532179	ABC transporter G member 22	Transport overview.Macromolecule transport.Multidrug transport.Multidrug ABC transport	AT2G36380
Vitvi06g01954	938.939	1.50162	0.411792	3.64654	0.000265792	0.00128388	S-receptor kinase	Signaling.Signaling pathway.Protein kinase	AT5G60900
Vitvi06g01962	7196.57	-1.11436	0.15129	-7.36567	1.76e-13	5.22e-12	Unknown protein	Unknown
Vitvi06g01963	103.356	2.75782	0.340589	8.09722	5.62e-16	2.35e-14	No hit	No hit
Vitvi06g01965	96.2338	2.37047	0.279652	8.4765	2.32e-17	1.15e-15	No hit	No hit
Vitvi06g01968	2399.9	-1.88799	0.344198	-5.48518	4.13e-08	4.97e-07	No hit	No hit
Vitvi07g00021	115.851	-1.38091	0.393792	-3.5067	0.000453703	0.00205482	Unknown protein	Unknown	AT2G30630
Vitvi07g00035	5797.23	1.33141	0.312631	4.25873	2.06e-05	0.000133981	Photosystem II reaction centre W (PsbW)	Metabolism.Primary metabolism.Generation of metabolite precursors and energy.Photosynthesis.Photosystem II	AT2G30570
Vitvi07g00039	476.605	1.76848	0.382486	4.62366	3.77e-06	2.95e-05	Lipase class 3	Unclear	AT2G30550
Vitvi07g00040	252.075	4.64351	0.630435	7.36557	1.76e-13	5.22e-12	F-box protein (FBL17)	Metabolism.Primary metabolism.Protein metabolism and modification.Proteolysis.cytoplasmic and nuclear protein degradation.Ubiquitin-mediated proteolysis	AT3G54650
Vitvi07g00055	257.211	4.50472	0.617573	7.29423	3e-13	8.65e-12	Beta-keto-Coa synthase	Unclear	AT1G04220
Vitvi07g00056	2053.19	5.13632	0.762326	6.7377	1.61e-11	3.5e-10	Beta-ketoacyl-CoA-synthase	Metabolism.Primary metabolism.Lipid metabolism.Fatty acid metabolism.Fatty acid biosynthesis	AT5G43760
Vitvi07g00057	13.0237	3.82766	1.27908	2.9925	0.00276705	0.00979265	fatty acid elongase	Metabolism.Primary metabolism.Lipid metabolism.Fatty acid metabolism.Fatty acid biosynthesis	AT2G26640
Vitvi07g00062	1309.22	1.44747	0.203129	7.1259	1.03e-12	2.75e-11	Pyruvate kinase isozyme A, chloroplast precursor	Metabolism.Primary metabolism.Carbohydrate metabolism.Glycolysis Gluconeogenesis.Glycolysis	AT3G22960
Vitvi07g00063	114.747	-10.5015	1.04713	-10.0289	1.14e-23	1.11e-21	Unknown protein	Unknown	AT1G03055
Vitvi07g00064	657	1.93119	0.294231	6.56353	5.25e-11	1.06e-09	Unknown protein	Unknown	AT3G63430
Vitvi07g00071	1514.83	1.31606	0.397521	3.31067	0.000930739	0.00381966	No hit	No hit
Vitvi07g00082	2523.77	-1.15967	0.36104	-3.21202	0.00131806	0.00517789	TIFY 4B (Protein PEAPOD 2)	Regulation overview.Regulation of gene expression.Regulation of transcription.Transcription factor.ZIM family transcription factor	AT4G14720
Vitvi07g00101	1014.12	1.14	0.209475	5.4422	5.26e-08	6.16e-07	Homocysteine S-methyltransferase 3	Metabolism.Primary metabolism.Amino acid metabolism.Methionine metabolism	AT3G63250
Vitvi07g00105	24.3392	4.2222	1.20766	3.49618	0.000471968	0.00212576	Inositol-1,4,5-trisphosphate 5-phosphatase CVP2, type I	Metabolism.Primary metabolism.Carbohydrate metabolism.Monosaccharide metabolism.Inositol phosphate metabolism	AT2G32010
Vitvi07g00106	74.9004	1.03534	0.311868	3.31981	0.00090079	0.00371415	Pentatricopeptide (PPR) repeat-containing protein	Diverse functions.Gene family with diverse functions.Pentatricopeptide domain family	AT1G03100
Vitvi07g00114	7397.63	1.19434	0.326171	3.66171	0.000250541	0.00121669	Unknown	Unknown
Vitvi07g00123	132.604	1.48566	0.4011	3.70397	0.00021225	0.00105135	Unknown protein	Unknown	AT5G28150
Vitvi07g00134	85.8324	4.36608	0.81762	5.33998	9.3e-08	1.04e-06	ARMADILLO BTB Arabidopsis protein 1 ABAP1	Regulation overview.Regulation of gene expression.Regulation of transcription.Transcription factor.TRAF	AT5G19330
Vitvi07g00146	254.243	2.6337	0.554953	4.7458	2.08e-06	1.72e-05	Nectarin IV NEC4	Response to stimulus.Stress response.Biotic stress response	AT1G03220
Vitvi07g00147	330.822	1.56319	0.533178	2.93184	0.00336966	0.0116202	7S globulin precursor, basic	Metabolism.Primary metabolism.Generation of metabolite precursors and energy.Storage proteins	AT1G03220
Vitvi07g00151	20.4888	-2.6969	0.585131	-4.60905	4.05e-06	3.14e-05	Basic helix-loop-helix (bHLH) family	Regulation overview.Regulation of gene expression.Regulation of transcription.Transcription factor.bHLH family transcription factor
Vitvi07g00154	898.849	1.43725	0.440395	3.26355	0.00110027	0.00441205	Isopentenyltransferase 5	Signaling.Hormone Signaling.Cytokinin Signaling.Cytokinin metabolism.Cytokinin biosynthesis	AT3G63110
Vitvi07g00164	570.201	-1.50113	0.270802	-5.54325	2.97e-08	3.69e-07	Circadian clock coupling factor ZGT	Signaling.Signaling pathway.Circadian clock Signaling	AT3G63060
Vitvi07g00176	78.8159	1.70533	0.690086	2.47119	0.0134664	0.0374509	Unknown	Unknown
Vitvi07g00177	154.899	5.43758	0.768972	7.07124	1.54e-12	3.98e-11	Unknown protein	Unknown	AT4G02800
Vitvi07g00190	1154.36	-1.07945	0.195235	-5.529	3.22e-08	3.97e-07	2OG-Fe(II) oxygenase	Metabolism.Cellular metabolism.Oxidation reduction.2OG-Fe(II) oxygenase superfamily	AT4G02940
Vitvi07g00202	152.997	3.37617	0.56831	5.94072	2.84e-09	4.29e-08	Endonuclease	Metabolism.Primary metabolism.Nucleobase, nucleoside, nucleotide, nucleic acid metabolism.Nucleic acid metabolism.DNA metabolism.DNA recombination and repair.repair	AT2G48030
Vitvi07g00211	5451.02	-1.05023	0.195713	-5.36618	8.04e-08	9.12e-07	Arabidopsis histidine phosphotransfer AHP1	Signaling.Hormone Signaling.Cytokinin Signaling.Cytokinin-mediated Signaling pathway	AT3G21510
Vitvi07g00213	171.988	2.65294	0.338594	7.83516	4.68e-15	1.74e-13	IMK2 (inflorescence meristem receptor-like kinase 2)	Signaling.Signaling pathway.Protein kinase	AT4G03010
Vitvi07g00219	522.315	2.97751	0.365415	8.1483	3.69e-16	1.59e-14	Histone H2AXb HTA3	Cellular process.Cellular component organization and biogenesis.Nucleus.Chromosome organization and biogenesis.Chromatin assembly	AT1G54690
Vitvi07g00231	131.292	4.11385	0.306237	13.4336	3.85e-41	1.85e-38	Rac GTPase activating protein	Transport overview.Incompletely characterized transport systems.Recognized transporters of unknown biochemical mechanism.Non ABC Multidrug Exporter	AT4G03100
Vitvi07g00232	310.575	1.50892	0.314825	4.79288	1.64e-06	1.4e-05	No hit	No hit
Vitvi07g00241	1525.99	1.50512	0.372812	4.03721	5.41e-05	0.000315526	flavin-containing monooxygenase	Metabolism.single reactions	AT1G48910
Vitvi07g00243	55.0698	6.59989	0.8212	8.03689	9.21e-16	3.74e-14	Kinase interacting family protein	Signaling.Signaling pathway.Protein kinase	AT2G47920
Vitvi07g00259	10853.8	-4.66795	0.445628	-10.475	1.13e-25	1.39e-23	Glutaredoxin	Response to stimulus.Stress response.Abiotic stress response.Oxidative stress response	AT1G03020
Vitvi07g00260	304.879	3.4835	0.517631	6.72969	1.7e-11	3.68e-10	Phototropic-responsive NPH3	Signaling.Signaling pathway.Light Signaling	AT1G03010
Vitvi07g00271	105.83	4.44403	0.899341	4.94143	7.76e-07	7.16e-06	Zinc finger (C2H2 type) MAGPIE	Regulation overview.Regulation of gene expression.Regulation of transcription.Transcription factor.C2H2 family transcription factor	AT1G03840
Vitvi07g00272	172.956	-1.43151	0.309074	-4.63161	3.63e-06	2.85e-05	Myb family	Regulation overview.Regulation of gene expression.Regulation of transcription.Transcription factor.MYB-related family transcription factor	AT2G47820
Vitvi07g00276	73.195	4.13211	0.445952	9.2658	1.94e-20	1.34e-18	Protein kinase WEE1	Signaling.Signaling pathway.Protein kinase	AT1G02970
Vitvi07g00283	1043.42	2.85374	0.262906	10.8546	1.9e-27	2.89e-25	Glutathione S-transferase 8 GSTF8	Metabolism.Primary metabolism.Coenzyme and prosthetic group metabolism.Peptide derived compounds biosynthesis.Glutathione metabolism	AT2G47730
Vitvi07g00285	3167.31	2.01189	0.289516	6.94914	3.68e-12	8.91e-11	Glutathione S-transferase 8 GSTF8	Metabolism.Primary metabolism.Coenzyme and prosthetic group metabolism.Peptide derived compounds biosynthesis.Glutathione metabolism	AT2G47730
Vitvi07g00286	8197.99	1.53191	0.266729	5.7433	9.28e-09	1.28e-07	Glutathione S-transferase 8 GSTF8	Metabolism.Primary metabolism.Coenzyme and prosthetic group metabolism.Peptide derived compounds biosynthesis.Glutathione metabolism	AT2G47730
Vitvi07g00293	106.27	2.5197	0.821331	3.06782	0.00215625	0.00791184	Auxin-responsive GH3	Signaling.Hormone Signaling.Auxin Signaling.Auxin-mediated Signaling pathway	AT2G47750
Vitvi07g00295	119.338	2.40074	0.634032	3.78647	0.000152802	0.000789056	Rapid ALkalinization Factor RALFL11	Signaling.Signaling pathway.Signaling molecules.Signaling peptide	AT4G15800
Vitvi07g00319	386.076	2.79137	0.708781	3.93827	8.21e-05	0.000457636	No hit	No hit
Vitvi07g00320	6439.46	1.47254	0.24943	5.90362	3.56e-09	5.28e-08	Glycosyl hydrolase family 1 protein	Metabolism.Primary metabolism.Carbohydrate metabolism.Carbohydrate catabolism	AT1G02850
Vitvi07g00327	123.9	1.29299	0.490593	2.63556	0.00839996	0.025303	Monoglyceride lipase	Metabolism.Primary metabolism.Lipid metabolism.Glycerolipid metabolism.Glycerolipid catabolism	AT3G62860
Vitvi07g00337	34.9981	1.30559	0.457318	2.85489	0.00430516	0.0143441	NAD+ ADP-ribosyltransferase	Metabolism.Primary metabolism.Coenzyme and prosthetic group metabolism.Nicotinate and nicotinamide metabolism	AT4G02390
Vitvi07g00352	292.173	7.12727	0.746419	9.54863	1.31e-21	1.05e-19	Endo-1,4-beta-glucanase	Cellular process.Cellular component organization and biogenesis.Cell wall organization and biogenesis.Cell wall metabolism.Cell wall catabolism.Cellulose catabolism	AT4G02290
Vitvi07g00365	27.3463	-3.06444	1.04377	-2.93592	0.00332556	0.0114891	Unknown	Unknown
Vitvi07g00367	44.8518	3.46658	0.954212	3.63292	0.000280227	0.00134567	Pathogenesis protein 10	Response to stimulus.Stress response.Biotic stress response
Vitvi07g00374	77.7028	-2.77091	0.599786	-4.61982	3.84e-06	3e-05	ARR2 type-B response regulator	Signaling.Hormone Signaling.Cytokinin Signaling.Cytokinin-mediated Signaling pathway	AT3G16857
Vitvi07g00376	508.014	6.34019	0.47682	13.2968	2.42e-40	1.08e-37	Cellulose synthase CSLD5	Cellular process.Cellular component organization and biogenesis.Cell wall organization and biogenesis.Cell wall metabolism.Cell wall biosynthesis.Cellulose biosynthesis	AT1G02730
Vitvi07g00380	176.434	-3.23686	0.713774	-4.53485	5.76e-06	4.3e-05	Unknown protein	Unknown	AT1G02700
Vitvi07g00381	345.821	7.78986	1.08074	7.20787	5.68e-13	1.56e-11	ATP binding protein	Unknown	AT4G13030
Vitvi07g00387	1828.77	-1.13743	0.242521	-4.69005	2.73e-06	2.21e-05	CTP synthase	Metabolism.Primary metabolism.Nucleobase, nucleoside, nucleotide, nucleic acid metabolism.Nucleotide metabolism.Pyrimidine metabolism	AT4G02120
Vitvi07g00388	38.3438	2.09073	0.496157	4.21385	2.51e-05	0.000159574	Translation initiation factor eIF-4B	Signaling.Signaling pathway.TOR Signaling pathway
Vitvi07g00390	304.037	2.50506	0.513225	4.88102	1.06e-06	9.44e-06	Unknown protein	Unknown	AT3G62630
Vitvi07g00392	540.189	-1.08471	0.182477	-5.94436	2.78e-09	4.21e-08	Unknown	Unknown
Vitvi07g00393	262.113	3.03193	0.82469	3.67645	0.000236503	0.00115769	Myb domain protein 12	Regulation overview.Regulation of gene expression.Regulation of transcription.Transcription factor.MYB family transcription factor	AT2G47460
Vitvi07g00399	51.8506	2.20167	0.58263	3.77885	0.000157554	0.000810708	BRCT domain-containing protein	Regulation overview.Regulation of gene expression.Regulation of transcription.Transcription factor.PHD family transcription factor	AT4G02110
Vitvi07g00400	111.87	4.90208	0.885478	5.53609	3.09e-08	3.83e-07	DnaJ homolog, subfamily C, member 7	Transport overview.Primary Active Transporters.P-P-bond hydrolysis-driven transporters.General Secretory Pathway (Sec)	AT2G47440
Vitvi07g00411	348.171	4.82058	0.727433	6.62684	3.43e-11	7.15e-10	PROLIFERA protein	Metabolism.Primary metabolism.Nucleobase, nucleoside, nucleotide, nucleic acid metabolism.Nucleic acid metabolism.DNA metabolism.DNA replication	AT4G02060
Vitvi07g00418	10.5358	3.68207	1.23424	2.98326	0.00285195	0.0100554	DELLA protein RGL2 (RGA-like protein 2)	Signaling.Hormone Signaling.Gibberellic acid Signaling.Gibberellic acid-mediated Signaling pathway	AT3G03450
Vitvi07g00421	1600.15	1.41323	0.270406	5.22634	1.73e-07	1.83e-06	WRKY DNA-binding protein 35	Regulation overview.Regulation of gene expression.Regulation of transcription.Transcription factor.WRKY family transcription factor	AT2G34830
Vitvi07g00431	327.168	-2.04265	0.458876	-4.45143	8.53e-06	6.14e-05	Stachyose synthase	Metabolism.Primary metabolism.Carbohydrate metabolism.Monosaccharide metabolism.Galactose metabolism	AT4G01970
Vitvi07g00441	15.6998	-2.73758	1.136	-2.40984	0.0159596	0.0431995	Glycerol-3-phosphate acyltransferase 3 (AtGPAT3)	Metabolism.Primary metabolism.Lipid metabolism.Glycerolipid metabolism.Glycerophospholipid metabolism.Glycerophospholipid biosynthesis	AT4G01950
Vitvi07g00450	92.9742	2.07462	0.657311	3.15622	0.00159827	0.00611322	Unknown protein	Unknown	AT4G01935
Vitvi07g00455	107.384	-1.43924	0.398426	-3.61231	0.000303485	0.00144295	Myb domain protein 78	Regulation overview.Regulation of gene expression.Regulation of transcription.Transcription factor.MYB family transcription factor	AT3G06490
Vitvi07g00457	829.742	-3.32955	0.519759	-6.40596	1.49e-10	2.79e-09	Galactinol synthase	Metabolism.Primary metabolism.Carbohydrate metabolism.Monosaccharide metabolism.Galactose metabolism	AT2G47180
Vitvi07g00467	13.7318	3.18915	1.32055	2.41501	0.0157346	0.0427177	Lipase GDSL	Unclear	AT1G09390
Vitvi07g00468	3000.59	1.08228	0.313825	3.44866	0.000563378	0.00248589	Alpha-L-fucosidase 2 precursor	Metabolism.Primary metabolism.Carbohydrate metabolism.Oligosaccharide metabolism.N-Glycan metabolism.N-Glycan catabolism	AT1G56670
Vitvi07g00470	348.646	3.73894	0.609973	6.12967	8.81e-10	1.46e-08	Boron transporter-like protein 1	Transport overview.Electrochemical Potential-driven Transporters.Porters.Anion Exchanger	AT3G62270
Vitvi07g00476	1132.5	1.02799	0.2446	4.20272	2.64e-05	0.000166811	TolB protein-related	Transport overview.Electrochemical Potential-driven Transporters.Ion gradient-driven energizers.Auxiliary Proteins for Energization of Outer Membrane Rpt	AT4G01870
Vitvi07g00490	341.663	-1.10517	0.203943	-5.41901	5.99e-08	6.95e-07	ABC transporter G member 21	Transport overview.Macromolecule transport.Multidrug transport.Multidrug ABC transport	AT3G53480
Vitvi07g00496	10.8065	2.60149	0.998614	2.60511	0.0091846	0.0272483	Expansin EXPA17	Signaling.Hormone Signaling.Auxin Signaling.Auxin-mediated Signaling pathway	AT4G01630
Vitvi07g00509	132.683	-2.94645	0.557195	-5.288	1.24e-07	1.36e-06	Haloacid dehalogenase hydrolase	Metabolism.Primary metabolism.Generation of metabolite precursors and energy.Glyoxylate and dicarboxylate metabolism	AT3G62040
Vitvi07g00516	5.11225	-6.01436	2.56472	-2.34503	0.0190255	0.0499545	CYP709B2	Metabolism.Cellular metabolism.Oxidation reduction.Cytochrome P450 oxidoreductase	AT2G46950
Vitvi07g00520	855.176	1.01696	0.189521	5.36596	8.05e-08	9.12e-07	Protoporphyrinogen oxidase (PPOX)	Metabolism.Primary metabolism.Cofactor metabolism.Tetrapyrrole metabolism	AT4G01690
Vitvi07g00523	2342.25	2.00511	0.434916	4.61033	4.02e-06	3.12e-05	WRKY DNA-binding protein 47	Regulation overview.Regulation of gene expression.Regulation of transcription.Transcription factor.WRKY family transcription factor	AT4G01720
Vitvi07g00524	94.7301	5.04346	0.78807	6.39976	1.56e-10	2.9e-09	Zinc finger (DHHC type)	Regulation overview.Regulation of gene expression.Regulation of transcription.Transcription factor.Zinc finger DHHC family transcription factor	AT4G01730
Vitvi07g00525	359.446	1.46066	0.22056	6.62252	3.53e-11	7.33e-10	Polygalacturonase GH28	Cellular process.Cellular component organization and biogenesis.Cell wall organization and biogenesis.Cell wall metabolism.Cell wall modification.Pectin modification	AT3G62110
Vitvi07g00526	387.878	-1.26243	0.173627	-7.27093	3.57e-13	1.02e-11	Ribosomal protein L7Ae	Metabolism.Primary metabolism.Protein metabolism and modification.Protein synthesis.Ribosome	AT4G01790
Vitvi07g00540	1498.97	-1.23911	0.166025	-7.46338	8.43e-14	2.65e-12	DNAJ heat shock N-terminal domain-containing	Transport overview.Primary Active Transporters.P-P-bond hydrolysis-driven transporters.General Secretory Pathway (Sec)
Vitvi07g00578	578.849	-2.57271	0.228978	-11.2356	2.73e-29	4.84e-27	Nodulin MtN21 family	Transport overview.Electrochemical Potential-driven Transporters.Porters.Drug/Metabolite Transporter.Plant Drug/Metabolite Exporter	AT2G39510
Vitvi07g00579	146.041	3.23692	0.383799	8.4339	3.34e-17	1.63e-15	Cyclin-dependent protein kinase CDT1A	Cellular process.Cell growth and death	AT2G31270
Vitvi07g00582	43.2225	6.51714	1.00406	6.49078	8.54e-11	1.65e-09	Zinc finger (C3HC4-type ring finger)	Regulation overview.Regulation of gene expression.Regulation of transcription.Transcription factor.Zinc finger C3HC4 family transcription factor	AT5G43420
Vitvi07g00586	8365.7	5.54527	0.868374	6.38582	1.7e-10	3.16e-09	Aspartyl protease	Metabolism.Primary metabolism.Protein metabolism and modification.Proteolysis.Peptidase-mediated proteolysis	AT2G03200
Vitvi07g00590	5.55061	5.7292	2.08984	2.74145	0.00611683	0.019375	Ethylene-responsive transcription factor ERF098	Signaling.Hormone Signaling.Ethylene Signaling.Ethylene-mediated Signaling pathway	AT3G23230
Vitvi07g00594	165.989	2.29498	0.653907	3.50964	0.000448706	0.00203557	Inorganic phosphate transporter 1-4	Transport overview.Electrochemical Potential-driven Transporters.Porters.Major Facilitator Superfamily.Phosphate: H+ Symporter	AT2G38940
Vitvi07g00598	2854.97	-1.51684	0.346133	-4.38225	1.17e-05	8.14e-05	Myb domain protein 14	Regulation overview.Regulation of gene expression.Regulation of transcription.Transcription factor.MYB family transcription factor	AT2G31180
Vitvi07g00604	318.821	1.65672	0.351131	4.71823	2.38e-06	1.95e-05	Unknown protein	Unknown	AT2G20515
Vitvi07g00617	846.497	1.11469	0.330657	3.37114	0.000748575	0.00317513	Arabinose-5-phosphate isomerase	Metabolism.Primary metabolism.Carbohydrate metabolism.Oligosaccharide metabolism.Glycan metabolism.Lipopolysaccharide biosynthesis	AT3G54690
Vitvi07g00625	1603.49	1.42022	0.368799	3.85095	0.000117662	0.000628906	CCR4-NOT complex subunit CAF16	Metabolism.Primary metabolism.Nucleobase, nucleoside, nucleotide, nucleic acid metabolism.Nucleic acid metabolism.RNA metabolism.RNA catabolism	AT1G03905
Vitvi07g00636	490.818	-1.11487	0.471597	-2.36403	0.0180771	0.0479615	Alcohol oxidase	Metabolism.Cellular metabolism.Methane metabolism	AT4G28570
Vitvi07g00640	195.961	-1.1969	0.343081	-3.48869	0.000485401	0.00217866	Unknown protein	Unknown	AT1G04000
Vitvi07g00654	46.5955	2.87018	0.710149	4.04165	5.31e-05	0.000310272	Ankyrin	Transport overview.Accessory factors involved in transport.Auxiliary transport proteins.Ankyrin	AT3G54070
Vitvi07g00659	430.938	5.35627	0.37433	14.309	1.92e-46	1.75e-43	Unknown protein	Unknown	AT1G04030
Vitvi07g00665	615.5	2.8119	0.263985	10.6517	1.71e-26	2.33e-24	Cellulose synthase CESA4	Cellular process.Cellular component organization and biogenesis.Cell wall organization and biogenesis.Cell wall metabolism.Cell wall biosynthesis.Cellulose biosynthesis	AT5G44030
Vitvi07g00667	1040.79	5.51558	1.07675	5.12244	3.02e-07	3.04e-06	Acid phosphatase class B	Metabolism.Primary metabolism.Carbohydrate metabolism.Monosaccharide metabolism.Inositol phosphate metabolism	AT5G44020
Vitvi07g00668	30.945	2.07622	0.643748	3.22521	0.00125882	0.00496534	Unknown	Unknown
Vitvi07g00676	366.001	-1.3564	0.297166	-4.56446	5.01e-06	3.78e-05	Receptor-like protein kinase	Signaling.Signaling pathway.Protein kinase	AT1G04520
Vitvi07g00680	155.827	2.90906	0.512654	5.67452	1.39e-08	1.85e-07	No hit	No hit
Vitvi07g00685	286.313	-1.04163	0.215182	-4.8407	1.29e-06	1.13e-05	Unknown protein	Unknown	AT3G04350
Vitvi07g00690	552.687	1.96244	0.466922	4.20293	2.63e-05	0.00016674	Photosystem II reaction centre W (PsbW)	Metabolism.Primary metabolism.Generation of metabolite precursors and energy.Photosynthesis.Photosystem II	AT4G28660
Vitvi07g00696	753.256	2.28735	0.636394	3.59423	0.000325351	0.00153619	Tyrosine decarboxylase	Metabolism.Primary metabolism.Amino acid metabolism.Aromatic amino acid metabolism.Tyrosine metabolism.Tyrosine catabolism	AT2G20340
Vitvi07g00698	24.6066	2.21008	0.761296	2.90306	0.00369541	0.0125896	DENN domain containing protein	Unknown	AT2G20320
Vitvi07g00735	24.829	-1.86232	0.472997	-3.93728	8.24e-05	0.000459213	Glutathione S-transferase 25 GSTU7	Metabolism.Primary metabolism.Coenzyme and prosthetic group metabolism.Peptide derived compounds biosynthesis.Glutathione metabolism	AT2G29420
Vitvi07g00762	150.275	1.46605	0.352895	4.15436	3.26e-05	0.000201903	Phytochrome interacting factor 3-like 5	Signaling.Signaling pathway.Circadian clock Signaling	AT2G20180
Vitvi07g00786	271.494	1.37961	0.314327	4.38908	1.14e-05	7.92e-05	Kinase-like protein TMKL1	Signaling.Signaling pathway.Protein kinase	AT3G24660
Vitvi07g00787	827.221	2.79154	0.549994	5.07558	3.86e-07	3.79e-06	Pectate lyase	Cellular process.Cellular component organization and biogenesis.Cell wall organization and biogenesis.Cell wall metabolism.Cell wall catabolism.Pectin catabolism	AT3G07010
Vitvi07g00792	1777.41	-1.42972	0.187716	-7.61643	2.61e-14	8.73e-13	UDP-glucose:sterol 3-O-glucosyltransferase	Metabolism.Primary metabolism.Lipid metabolism.Steroid metabolism.Steroid biosynthesis	AT3G07020
Vitvi07g00830	5071.97	-1.25923	0.167909	-7.49951	6.41e-14	2.04e-12	Unknown protein	Unknown
Vitvi07g00879	221.071	7.6748	0.700678	10.9534	6.4e-28	1.01e-25	Pore-forming toxin-like protein Hfr-2	Transport overview.Channels and pores.Pore-forming toxins.Aerolysin Channel-forming Toxin
Vitvi07g00887	47.4156	1.36114	0.38841	3.5044	0.000457646	0.00207038	RPM1 (resistance to p. syringae pv maculicola 1)	Response to stimulus.Stress response.Biotic stress response.Plant-pathogen interaction	AT3G07040
Vitvi07g00894	184.077	1.24563	0.24556	5.07259	3.92e-07	3.84e-06	RPM1 (resistance to p. syringae pv maculicola 1)	Response to stimulus.Stress response.Biotic stress response.Plant-pathogen interaction	AT3G07040
Vitvi07g00905	318.731	1.59318	0.294926	5.40197	6.59e-08	7.58e-07	Phototropic-responsive NPH3	Signaling.Signaling pathway.Light Signaling	AT5G48800
Vitvi07g00924	511.318	3.54463	0.287284	12.3384	5.63e-35	1.77e-32	FRK1 (FLG22-induced receptor-like kinase 1)	Response to stimulus.Stress response.Biotic stress response.Plant-pathogen interaction	AT5G48740
Vitvi07g01038	263.854	1.06048	0.219454	4.83238	1.35e-06	1.17e-05	Auxin-independent growth promoter (axi 1)	Signaling.Hormone Signaling.Auxin Signaling.Auxin-mediated Signaling pathway	AT1G04910
Vitvi07g01061	195.734	3.6602	0.647988	5.64856	1.62e-08	2.13e-07	Mini-chromosome maintenance protein MCM6	Metabolism.Primary metabolism.Nucleobase, nucleoside, nucleotide, nucleic acid metabolism.Nucleic acid metabolism.DNA metabolism.DNA replication	AT5G44635
Vitvi07g01078	74.5919	2.6705	0.921352	2.89845	0.00375007	0.0127527	Unknown protein	Unknown	AT3G25130
Vitvi07g01120	254.613	-1.55264	0.276795	-5.60936	2.03e-08	2.62e-07	Nuclear transport factor 2 (NTF2)	Transport overview.Primary Active Transporters.P-P-bond hydrolysis-driven transporters.Nuclear mRNA Exporter	AT3G25150
Vitvi07g01124	103.196	1.89854	0.348343	5.4502	5.03e-08	5.92e-07	Unknown	Unknown
Vitvi07g01140	606.749	5.39816	0.504489	10.7003	1.01e-26	1.42e-24	Unknown protein	Unknown	AT5G48500
Vitvi07g01197	1054.08	-1.07868	0.223806	-4.8197	1.44e-06	1.24e-05	Unknown protein	Unknown	AT3G07510
Vitvi07g01213	322.315	1.66743	0.40964	4.07048	4.69e-05	0.000278313	formin protein AHF1	Cellular process.Cellular component organization and biogenesis.Cytoskeleton organization and biogenesis.Actin organization and biogenesis	AT3G25500
Vitvi07g01217	962.689	1.0457	0.280394	3.72939	0.000191943	0.00096203	MLO1	Cellular process.Cell growth and death.Cell death	AT4G02600
Vitvi07g01222	2174.7	-1.2074	0.319918	-3.77408	0.000160599	0.000823958	Disease resistance protein	Diverse functions.Gene family with diverse functions.NBS-LRR superfamily
Vitvi07g01233	24.2078	1.47139	0.528431	2.78444	0.00536204	0.0173014	Unknown protein	Unknown	AT1G33500
Vitvi07g01240	437.515	1.03582	0.316234	3.27548	0.00105484	0.00426194	Glycosyl hydrolase family 20 protein	Metabolism.Primary metabolism.Carbohydrate metabolism.Carbohydrate catabolism	AT1G65590
Vitvi07g01247	148.374	2.37635	0.431739	5.50414	3.71e-08	4.53e-07	Acetolactate synthase small subunit	Metabolism.Primary metabolism.Amino acid metabolism.Valine, leucine, and isoleucine metabolism.Valine, leucine, and isoleucine biosynthesis	AT5G16290
Vitvi07g01268	102.878	1.43326	0.46764	3.06488	0.00217757	0.00797575	Ternary complex factor MIP1	Unknown	AT5G66600
Vitvi07g01272	42.0501	2.80629	0.69586	4.03283	5.51e-05	0.00032055	Unknown protein	Unknown	AT2G23690
Vitvi07g01275	12136.6	1.20122	0.284339	4.22459	2.39e-05	0.000152988	Photosystem II PsbO protein	Metabolism.Primary metabolism.Generation of metabolite precursors and energy.Photosynthesis.Photosystem II	AT3G50820
Vitvi07g01277	889.54	2.01067	0.231011	8.70377	3.21e-18	1.74e-16	Phototropic-responsive NPH3	Signaling.Signaling pathway.Light Signaling	AT5G66560
Vitvi07g01285	1816.02	-1.00568	0.243394	-4.1319	3.6e-05	0.000220789	Unknown protein	Unknown	AT3G50380
Vitvi07g01298	575.262	2.93199	0.259753	11.2876	1.51e-29	2.81e-27	OBF binding protein 1	Regulation overview.Regulation of gene expression.Regulation of transcription.Transcription factor.C2C2-DOF family transcription factor	AT3G50410
Vitvi07g01300	1234.12	-2.05171	0.302354	-6.78579	1.15e-11	2.59e-10	Polyneuridine-aldehyde esterase precursor	Metabolism.Secondary metabolism.Terpenoid metabolism.Monoterpenoid metabolism.Monoterpenoid biosynthesis	AT2G23620
Vitvi07g01308	3594.55	4.49041	0.379509	11.8322	2.66e-32	6.8e-30	Monocopper oxidase SKS17 (SKU5 Similar 17)	Transport overview.Incompletely characterized transport systems.Recognized transporters of unknown biochemical mechanism.Iron/Lead Transporter.Oxidase-dep Fe2+ Transporter	AT5G66920
Vitvi07g01315	130.261	1.62236	0.574963	2.82168	0.00477725	0.0156555	R protein MLA10	Response to stimulus.Stress response.Biotic stress response.Plant-pathogen interaction.R proteins from Plant-pathogen interaction
Vitvi07g01316	21.6943	2.16368	0.807532	2.67938	0.00737592	0.0226892	No hit	No hit
Vitvi07g01317	628.18	-1.9862	0.378142	-5.25252	1.5e-07	1.61e-06	R protein disease resistance protein	Response to stimulus.Stress response.Biotic stress response.Plant-pathogen interaction.R proteins from Plant-pathogen interaction	AT5G66900
Vitvi07g01325	2101.17	-1.24534	0.288234	-4.3206	1.56e-05	0.000104629	Myb family	Regulation overview.Regulation of gene expression.Regulation of transcription.Transcription factor.G2-like family transcription factor	AT1G49560
Vitvi07g01326	50.9137	-2.5722	0.607046	-4.23725	2.26e-05	0.000145641	Lateral organ boundaries domain gene 36	Regulation overview.Regulation of gene expression.Regulation of transcription.Transcription factor.AS2 family transcription factor	AT5G66870
Vitvi07g01333	184.966	-1.41968	0.499639	-2.84141	0.00449147	0.0148639	Patatin	Metabolism.Primary metabolism.Generation of metabolite precursors and energy.Storage proteins	AT2G26560
Vitvi07g01350	179.274	1.55836	0.282242	5.52138	3.36e-08	4.13e-07	Unknown protein	Unknown	AT5G10150
Vitvi07g01354	105.849	-2.73181	0.882153	-3.09675	0.00195656	0.00728225	Annexin ANN6	Transport overview.Channels and pores.a-Type channels.Annexin
Vitvi07g01358	82.1759	1.91982	0.350748	5.4735	4.41e-08	5.26e-07	UNE2 (unfertilized embryo sac 2)	Transport overview.Electrochemical Potential-driven Transporters.Porters.Major Facilitator Superfamily.Drug:H+ Antiporter-1 (12 Spanner)	AT5G10190
Vitvi07g01365	2626.13	1.08842	0.356155	3.05603	0.00224287	0.00818802	Trehalose-6-phosphate phosphatase	Metabolism.Primary metabolism.Carbohydrate metabolism.Polysaccharide metabolism.Starch and sucrose metabolism	AT5G65140
Vitvi07g01377	14.766	2.72374	1.04308	2.61125	0.00902119	0.0268643	Carrier protein, Mitochondrial	Transport overview.Electrochemical Potential-driven Transporters.Porters.Mitochondrial Carrier	AT5G64970
Vitvi07g01378	2498.56	2.57943	0.306559	8.41416	3.96e-17	1.92e-15	Unknown protein	Unknown	AT4G39900
Vitvi07g01392	327.189	-1.87592	0.386694	-4.85118	1.23e-06	1.08e-05	Unknown	Unknown
Vitvi07g01394	338.465	1.71638	0.553277	3.1022	0.00192085	0.00717256	UDP-glucose glucosyltransferase	Metabolism.Primary metabolism.Carbohydrate metabolism.Polysaccharide metabolism.Starch and sucrose metabolism	AT1G22340
Vitvi07g01402	176.245	2.01709	0.306392	6.58336	4.6e-11	9.36e-10	Kinesin motor protein	Cellular process.Cellular component organization and biogenesis.Cytoskeleton organization and biogenesis.Microtubule organization and biogenesis.Microtubule-driven movement	AT2G22610
Vitvi07g01408	1322.32	-1.08942	0.399184	-2.72911	0.00635059	0.0200172	1-deoxy-D-xylulose-5-phosphate synthase, chloroplast precursor	Metabolism.Primary metabolism.Lipid metabolism.Steroid metabolism.Steroid biosynthesis	AT4G15560
Vitvi07g01411	20.8638	3.05906	1.18752	2.576	0.00999498	0.0292109	Anthocyanidine rhamnosyl-transferase	Metabolism.Secondary metabolism.Phenylpropanoid metabolism.Flavonoid metabolism.Flavonoid biosynthesis.Anthocyanin biosynthesis.Anthocyanin-glycoside biosynthesis	AT2G22590
Vitvi07g01412	620.259	2.5051	0.339345	7.38215	1.56e-13	4.66e-12	UDP-rhamnose/rhamnosyltransferase	Metabolism.Secondary metabolism.Phenylpropanoid metabolism.Flavonoid metabolism.Flavonoid biosynthesis.Anthocyanin biosynthesis.Anthocyanin-glycoside biosynthesis	AT5G65550
Vitvi07g01413	708.527	1.20619	0.263553	4.57665	4.72e-06	3.6e-05	UDP-rhamnose/rhamnosyltransferase	Metabolism.Secondary metabolism.Phenylpropanoid metabolism.Flavonoid metabolism.Flavonoid biosynthesis.Anthocyanin biosynthesis.Anthocyanin-glycoside biosynthesis	AT2G22590
Vitvi07g01414	290.67	1.16603	0.338494	3.44476	0.000571567	0.00251598	UDP-glucuronosyl/UDP-glucosyltransferase	Metabolism.Primary metabolism.Carbohydrate metabolism.Monosaccharide metabolism.Pentose glucuronate interconversion
Vitvi07g01415	123.294	4.61507	1.116	4.13537	3.54e-05	0.000218025	UDP-glucoronosyl/UDP-glucosyl transferase	Metabolism.Secondary metabolism.Phenylpropanoid metabolism.Flavonoid metabolism.Flavonoid biosynthesis.Anthocyanin biosynthesis.Anthocyanin-glycoside biosynthesis
Vitvi07g01423	712.482	2.28579	0.379315	6.02611	1.68e-09	2.67e-08	Protein kinase	Signaling.Signaling pathway.Protein kinase	AT5G65500
Vitvi07g01433	85.6603	3.26445	0.74718	4.36903	1.25e-05	8.6e-05	Centromere protein	Cellular process.Cell growth and death	AT4G38070
Vitvi07g01440	24.1695	3.85493	1.03803	3.7137	0.00020425	0.00101603	RAB GDP dissociation inhibitor 1 ATGD1	Signaling.Signaling pathway.G-protein signaling pathway.RAB-GTPase regulation	AT5G09550
Vitvi07g01450	61.9798	1.89047	0.7566	2.49863	0.0124673	0.0351668	Unknown protein	Unknown	AT4G24610
Vitvi07g01451	18.0498	3.85897	1.01768	3.79193	0.00014948	0.000774825	Unknown protein	Unknown	AT4G24610
Vitvi07g01460	6.66981	4.55312	1.5543	2.92937	0.00339645	0.011706	Cyclin delta-2 (CYCD2)	Cellular process.Cell growth and death	AT2G22490
Vitvi07g01468	198.735	1.26846	0.539404	2.35159	0.0186934	0.049283	Unknown protein	Unknown	AT5G65400
Vitvi07g01475	94.2883	8.35363	1.0733	7.78312	7.08e-15	2.54e-13	Basic helix-loop-helix (bHLH) family	Regulation overview.Regulation of gene expression.Regulation of transcription.Transcription factor.bHLH family transcription factor	AT1G72210
Vitvi07g01488	21994.6	1.18401	0.225964	5.23981	1.61e-07	1.72e-06	Homeobox-leucine zipper protein ATHB-6	Signaling.Hormone Signaling.ABA Signaling.ABA-mediated Signaling pathway	AT2G22430
Vitvi07g01495	10.6726	3.80879	1.60942	2.36657	0.017954	0.0476874	Unknown protein	Unknown	AT4G40020
Vitvi07g01502	2068.48	-1.20443	0.369466	-3.25991	0.00111446	0.0044624	Peroxidase 17	Metabolism.Primary metabolism.Amino acid metabolism.Aromatic amino acid metabolism.Phenylalanine metabolism.Phenylalanine biosynthesis	AT2G22420
Vitvi07g01516	8.46003	-4.53575	1.16049	-3.90847	9.29e-05	0.000510828	MADS-box agamous-like 21	Regulation overview.Regulation of gene expression.Regulation of transcription.Transcription factor.MADS-box family transcription factor
Vitvi07g01519	132.715	-3.11082	0.487843	-6.37668	1.81e-10	3.35e-09	Unknown	Unknown
Vitvi07g01530	15.4126	7.20279	1.44759	4.97572	6.5e-07	6.08e-06	Basic helix-loop-helix (bHLH) family	Regulation overview.Regulation of gene expression.Regulation of transcription.Transcription factor.bHLH family transcription factor	AT2G22750
Vitvi07g01532	72.1089	-2.48485	0.787667	-3.15469	0.00160667	0.00614248	Basic helix-loop-helix (bHLH) family	Regulation overview.Regulation of gene expression.Regulation of transcription.Transcription factor.bHLH family transcription factor	AT4G37850
Vitvi07g01535	197.036	1.66062	0.464692	3.57359	0.000352119	0.00164768	Kinesin motor protein	Cellular process.Cellular component organization and biogenesis.Cytoskeleton organization and biogenesis.Microtubule organization and biogenesis.Microtubule-driven movement	AT3G49650
Vitvi07g01542	2185.29	1.31713	0.239136	5.50788	3.63e-08	4.44e-07	Zinc finger (C3HC4-type ring finger)	Regulation overview.Regulation of gene expression.Regulation of transcription.Transcription factor.Zinc finger C3HC4 family transcription factor	AT5G49665
Vitvi07g01552	269.169	1.26152	0.346273	3.64314	0.000269332	0.00130023	BZIP transcription factor BZIP6	Regulation overview.Regulation of gene expression.Regulation of transcription.Transcription factor.bZIP family transcription factor
Vitvi07g01558	46.2884	2.43336	0.65998	3.68701	0.000226902	0.00111559	Unknown	Unknown
Vitvi07g01564	20.6755	7.62664	1.12946	6.75247	1.45e-11	3.19e-10	Cyclin-D like protein	Cellular process.Cell growth and death	AT4G34160
Vitvi07g01565	1540.61	1.44569	0.323448	4.46962	7.84e-06	5.7e-05	Unknown protein	Unknown	AT5G67620
Vitvi07g01578	26.201	3.93653	0.925584	4.25303	2.11e-05	0.000137074	Unknown protein	Unknown	AT5G67550
Vitvi07g01596	110.185	1.27324	0.242569	5.24896	1.53e-07	1.64e-06	Binding	Unknown	AT1G64960
Vitvi07g01598	2294.16	-2.21092	0.306699	-7.20878	5.65e-13	1.55e-11	BT4 (BTB and TAZ Domain protein 4)	Regulation overview.Regulation of gene expression.Regulation of transcription.Transcription factor.TAZ family transcription factor	AT5G67480
Vitvi07g01600	356.971	1.70522	0.350133	4.8702	1.11e-06	9.92e-06	Glucan endo-1,3-beta-glucosidase 7 precursor	Metabolism.Primary metabolism.Carbohydrate metabolism.Polysaccharide metabolism.Starch and sucrose metabolism	AT5G67460
Vitvi07g01604	366.179	-2.60677	0.41505	-6.28062	3.37e-10	5.97e-09	N-acetyltransferase hookless1 HLS1	Signaling.Hormone Signaling.Ethylene Signaling.Ethylene-mediated Signaling pathway	AT4G37580
Vitvi07g01614	1907.12	3.63872	0.625484	5.81745	5.98e-09	8.52e-08	Peroxidase 73	Metabolism.Primary metabolism.Amino acid metabolism.Aromatic amino acid metabolism.Phenylalanine metabolism.Phenylalanine biosynthesis	AT5G67400
Vitvi07g01617	664.975	2.88422	0.694493	4.15299	3.28e-05	0.000203016	Phototropic-responsive NPH3	Regulation overview.Regulation of gene expression.Regulation of transcription.Transcription factor.TRAF	AT5G67385
Vitvi07g01627	16994	1.09969	0.236613	4.64763	3.36e-06	2.66e-05	Hydrogenobyrinic acid a,c-diamide synthase	Transport overview.Channels and pores.√ü-Barrel porins.Autotransporter	AT5G67360
Vitvi07g01633	2677.47	1.7787	0.317384	5.60425	2.09e-08	2.69e-07	Hydrolase, alpha/beta fold family	Unknown	AT4G37470
Vitvi07g01636	2093.59	3.90475	0.410558	9.51084	1.89e-21	1.49e-19	No hit	No hit
Vitvi07g01651	147.725	1.08315	0.403711	2.68298	0.007297	0.0224916	CYP81E1 Isoflavone 2'-hydroxylase	Metabolism.Secondary metabolism.Phenylpropanoid metabolism.Flavonoid metabolism.Isoflavonoid metabolism.Isoflavonoid biosynthesis	AT4G37370
Vitvi07g01657	236.357	-1.61888	0.618677	-2.61668	0.00887893	0.0265308	CYP81E1 Isoflavone 2'-hydroxylase	Metabolism.Secondary metabolism.Phenylpropanoid metabolism.Flavonoid metabolism.Isoflavonoid metabolism.Isoflavonoid biosynthesis	AT4G37370
Vitvi07g01670	1319	1.53196	0.256742	5.96693	2.42e-09	3.72e-08	Protein kinase pto	Response to stimulus.Stress response.Biotic stress response.Plant-pathogen interaction	AT5G24010
Vitvi07g01678	352.61	3.94376	0.505094	7.80796	5.81e-15	2.14e-13	Leucine-rich repeat protein kinase	Signaling.Signaling pathway.Protein kinase	AT2G23300
Vitvi07g01679	311.711	5.31213	0.638624	8.31809	8.94e-17	4.14e-15	Microtubule end binding protein 1 (EB1)	Cellular process.Cellular component organization and biogenesis.Cytoskeleton organization and biogenesis.Microtubule organization and biogenesis.Microtubule-driven movement	AT5G67270
Vitvi07g01681	7.80884	-4.4636	1.43766	-3.10476	0.00190433	0.00712281	No hit	No hit
Vitvi07g01682	1783.89	-1.86592	0.282711	-6.60011	4.11e-11	8.44e-10	ADP-ribosylation factor	Cellular process.Cellular transport.Protein trafficking.Vesicle-mediated trafficking	AT1G10630
Vitvi07g01683	743.593	1.68552	0.223203	7.55149	4.3e-14	1.41e-12	Cyclin D	Cellular process.Cell growth and death	AT3G50070
Vitvi07g01686	81.7605	2.3966	0.346107	6.92444	4.38e-12	1.05e-10	Phosphoric monoester hydrolase	Signaling.Signaling pathway.Protein phosphatase	AT3G19420
Vitvi07g01698	872.562	1.54113	0.291903	5.27961	1.29e-07	1.41e-06	Leucine-rich repeat transmembrane protein kinase	Signaling.Signaling pathway.Protein kinase	AT5G67200
Vitvi07g01709	331.221	1.10432	0.149916	7.36626	1.75e-13	5.22e-12	Transporter-related	Transport overview.Incompletely characterized transport systems.Putative transport protein.Transporter unknown	AT2G23360
Vitvi07g01711	107.721	1.0282	0.40512	2.53802	0.0111481	0.032054	Anthranilate N-hydroxycinnamoyl/benzoyltransferase	Metabolism.Primary metabolism.Amino acid metabolism.Aromatic amino acid metabolism.Aromatic amino acid biosynthesis	AT5G67150
Vitvi07g01718	69.7191	3.42557	0.737897	4.64234	3.44e-06	2.72e-05	Anthranilate N-hydroxycinnamoyl/benzoyltransferase	Metabolism.Primary metabolism.Amino acid metabolism.Aromatic amino acid metabolism.Aromatic amino acid biosynthesis	AT3G50280
Vitvi07g01719	86.1065	2.67514	0.745559	3.5881	0.000333098	0.00156813	Anthranilate N-hydroxycinnamoyl/benzoyltransferase	Metabolism.Primary metabolism.Amino acid metabolism.Aromatic amino acid metabolism.Aromatic amino acid biosynthesis	AT3G50280
Vitvi07g01721	490.179	1.63363	0.236042	6.92093	4.49e-12	1.07e-10	Curly leaf PHCLF1	Development.Reproductive development.Flower development	AT2G23380
Vitvi07g01733	598.652	2.00175	0.294307	6.80157	1.03e-11	2.33e-10	MAP3K protein kinase	Signaling.Signaling pathway.Protein kinase.MAPK cascade	AT4G36945
Vitvi07g01734	179.192	3.2739	0.369837	8.85227	8.58e-19	4.97e-17	Subtilase	Transport overview.Channels and pores.√ü-Barrel porins.Autotransporter	AT5G67090
Vitvi07g01736	110.156	4.31694	0.758877	5.6886	1.28e-08	1.72e-07	No hit	No hit
Vitvi07g01739	2086.29	2.92211	0.38819	7.52752	5.17e-14	1.68e-12	Rapid ALkalinization Factor RALFL34	Signaling.Signaling pathway.Signaling molecules.Signaling peptide	AT5G67070
Vitvi07g01742	545.138	1.55444	0.208019	7.47259	7.86e-14	2.48e-12	Triacylglycerol lipase	Metabolism.Primary metabolism.Lipid metabolism.Glycerolipid metabolism.Glycerolipid catabolism	AT5G67050
Vitvi07g01744	1326.38	1.87758	0.376179	4.9912	6e-07	5.67e-06	Remorin	Unclear	AT4G36970
Vitvi07g01745	1029.76	1.19175	0.235172	5.06758	4.03e-07	3.93e-06	Zeaxanthin epoxidase (ZEP) (ABA1)	Metabolism.Secondary metabolism.Terpenoid metabolism.Tetraterpenoid metabolism.Tetraterpenoid biosynthesis.Carotenoid biosynthesis	AT5G67030
Vitvi07g01746	512.034	1.36313	0.333297	4.08985	4.32e-05	0.000258942	Unknown protein	Unknown
Vitvi07g01752	1149.89	1.77139	0.262055	6.75962	1.38e-11	3.05e-10	Caltractin / centrin	Metabolism.Primary metabolism.Nucleobase, nucleoside, nucleotide, nucleic acid metabolism.Nucleic acid metabolism.DNA metabolism.DNA recombination and repair.repair.Nucleotide excision repair	AT3G50360
Vitvi07g01753	25.2168	1.68198	0.383101	4.39043	1.13e-05	7.88e-05	Pentatricopeptide (PPR) repeat-containing	Diverse functions.Gene family with diverse functions.Pentatricopeptide domain family	AT3G09040
Vitvi07g01760	364.014	-1.69936	0.372816	-4.55817	5.16e-06	3.89e-05	EF hand	Signaling.Signaling pathway.Calcium sensors and Signaling
Vitvi07g01769	59.2936	9.14656	1.14692	7.97491	1.52e-15	6.03e-14	Patatin	Metabolism.Primary metabolism.Generation of metabolite precursors and energy.Storage proteins	AT4G37070
Vitvi07g01773	297.539	1.37836	0.311038	4.4315	9.36e-06	6.65e-05	Nodulation protein	Unclear	AT3G50620
Vitvi07g01777	15275.1	1.02992	0.345838	2.97805	0.00290088	0.0102001	Inositol-3-phosphate synthase	Metabolism.Primary metabolism.Carbohydrate metabolism.Monosaccharide metabolism.Inositol phosphate metabolism	AT2G22240
Vitvi07g01779	141.223	1.60494	0.678042	2.36703	0.0179317	0.0476463	Sulfate transporter 2.1 (AST68)	Transport overview.Electrochemical Potential-driven Transporters.Porters.Sulfate Permease	AT5G10180
Vitvi07g01780	35.9928	3.63141	0.896347	4.05134	5.09e-05	0.000299146	Exonuclease	Metabolism.Primary metabolism.Nucleobase, nucleoside, nucleotide, nucleic acid metabolism.Nucleic acid metabolism.Nucleic acid catabolism	AT4G39810
Vitvi07g01784	57.4124	3.20645	0.823794	3.8923	9.93e-05	0.000541873	D-galactoside/L-rhamnose binding SUEL lectin	Unclassified
Vitvi07g01790	61.8813	2.82234	0.998359	2.82698	0.00469889	0.0154461	Ascorbate oxidase	Metabolism.Primary metabolism.Organic acid metabolism.Ascorbate and aldarate metabolism	AT4G39830
Vitvi07g01791	239.071	2.00018	0.457591	4.37111	1.24e-05	8.52e-05	Ascorbate oxidase	Metabolism.Primary metabolism.Organic acid metabolism.Ascorbate and aldarate metabolism	AT4G39830
Vitvi07g01794	1195.65	1.52219	0.509367	2.9884	0.00280439	0.00991624	Hyperosmotically inducible periplasmic protein	Transport overview.Primary Active Transporters.P-P-bond hydrolysis-driven transporters.P-type ATPase (P-ATPase).Cu2+-exporting ATPase	AT4G39700
Vitvi07g01804	679.87	1.03727	0.2609	3.97573	7.02e-05	0.00039715	1-acylglycerone phosphate reductase	Metabolism.Primary metabolism.Lipid metabolism.Glycerolipid metabolism.Glycerophospholipid metabolism	AT5G10050
Vitvi07g01816	66.2858	-1.0936	0.424697	-2.57501	0.0100236	0.0292872	Pentatricopeptide repeat protein PPR986-12	Diverse functions.Gene family with diverse functions.Pentatricopeptide domain family	AT1G11290
Vitvi07g01829	9744.84	-1.02376	0.205394	-4.98439	6.22e-07	5.85e-06	Stress enhanced protein 2 (SEP2)	Metabolism.Primary metabolism.Generation of metabolite precursors and energy.Photosynthesis.Antenna proteins	AT2G21970
Vitvi07g01830	3439.13	-1.38879	0.15255	-9.10383	8.72e-20	5.69e-18	4-alpha-glucanotransferase	Metabolism.Primary metabolism.Carbohydrate metabolism.Polysaccharide metabolism.Starch and sucrose metabolism.Starch biosynthesis catabolism.Starch branching	AT5G64860
Vitvi07g01831	160.913	2.55943	0.604017	4.23734	2.26e-05	0.000145617	Unknown protein	Unknown	AT2G21960
Vitvi07g01861	1917.82	1.22242	0.242436	5.04224	4.6e-07	4.44e-06	BRI1 protein	Signaling.Hormone Signaling.Brassinosteroid Signaling.Brassinosteroid-mediated Signaling pathway	AT4G39400
Vitvi07g01875	1284.85	1.02438	0.132923	7.70659	1.29e-14	4.52e-13	Ribonucleotide reductase large subunit A	Metabolism.Primary metabolism.Nucleobase, nucleoside, nucleotide, nucleic acid metabolism.Nucleotide metabolism.Purine metabolism	AT2G21790
Vitvi07g01881	120.352	-3.0774	0.432167	-7.12086	1.07e-12	2.84e-11	Cellulose synthase CESA2	Cellular process.Cellular component organization and biogenesis.Cell wall organization and biogenesis.Cell wall metabolism.Cell wall biosynthesis.Cellulose biosynthesis	AT4G39350
Vitvi07g01889	98.7149	2.40679	1.00807	2.38752	0.0169623	0.0455116	Protein phosphatase 2C DBP	Regulation overview.Regulation of gene expression.Regulation of transcription.Transcription factor.DBP family transcription factor	AT3G51470
Vitvi07g01890	3489.09	1.17486	0.273375	4.2976	1.73e-05	0.000114616	Glutamate receptor GLR3.6	Transport overview.Channels and pores.a-Type channels.Glutamate-gated Ion Channel of Neurotransmitter Receptors	AT3G51480
Vitvi07g01893	5764.68	2.33599	0.428539	5.45106	5.01e-08	5.9e-07	Auxin efflux carrier	Signaling.Hormone Signaling.Auxin Signaling.Auxin transport	AT2G17500
Vitvi07g01904	73.9455	1.34233	0.355924	3.77138	0.000162349	0.000831368	No hit	No hit
Vitvi07g01912	111.34	-1.00313	0.403703	-2.48483	0.0129612	0.0363426	Amino acid permease 3	Transport overview.Electrochemical Potential-driven Transporters.Porters.Amino Acid/Auxin Permease	AT1G77380
Vitvi07g01921	423.172	4.18274	0.485151	8.62153	6.61e-18	3.45e-16	ABC transporter G member 14	Transport overview.Macromolecule transport.Multidrug transport.Multidrug ABC transport	AT2G13610
Vitvi07g01923	1731.63	2.00995	0.266688	7.53668	4.82e-14	1.57e-12	UVB-resistance protein UVR8	Response to stimulus.Stress response.Abiotic stress response.UV stress response	AT5G63860
Vitvi07g01930	464.071	2.45587	0.397961	6.17112	6.78e-10	1.15e-08	Aspartic proteinase Asp1 precursor	Metabolism.Primary metabolism.Protein metabolism and modification.Proteolysis.Peptidase-mediated proteolysis	AT4G33490
Vitvi07g01948	1066.1	-1.01721	0.23913	-4.25381	2.1e-05	0.000136707	No hit	No hit
Vitvi07g01951	219.83	-3.2036	0.378852	-8.45608	2.77e-17	1.36e-15	Auxin-responsive SAUR12	Signaling.Hormone Signaling.Auxin Signaling.Auxin-mediated Signaling pathway
Vitvi07g01955	34.9125	3.35046	1.14453	2.92736	0.00341851	0.0117754	Unknown protein	Unknown	AT4G08330
Vitvi07g01956	140.966	1.3682	0.33963	4.0285	5.61e-05	0.000325281	Cyclase/dehydrase	Unclear	AT5G08720
Vitvi07g01970	713.449	2.37623	0.500275	4.74984	2.04e-06	1.69e-05	Aspartyl protease	Metabolism.Primary metabolism.Protein metabolism and modification.Proteolysis.Peptidase-mediated proteolysis	AT2G03200
Vitvi07g01977	41.4152	2.87059	1.17279	2.44765	0.014379	0.039576	Ammonium transporter 2	Transport overview.Channels and pores.a-Type channels.Ammonia Channel Transporter	AT2G38290
Vitvi07g01990	1172.97	1.46068	0.531172	2.74991	0.00596109	0.0189526	Isoflavone reductase	Metabolism.Secondary metabolism.Phenylpropanoid metabolism.Flavonoid metabolism.Isoflavonoid metabolism.Isoflavonoid biosynthesis	AT1G75280
Vitvi07g01991	152.271	-1.46067	0.3238	-4.511	6.45e-06	4.77e-05	GPI transamidase subunit PIG-U	Metabolism.Primary metabolism.Lipid metabolism.Glycolipid metabolism.GPI anchor biosynthesis	AT5G64520
Vitvi07g01993	14.5309	-5.11014	1.17884	-4.33489	1.46e-05	9.87e-05	F-box family protein	Metabolism.Primary metabolism.Protein metabolism and modification.Proteolysis.cytoplasmic and nuclear protein degradation.Ubiquitin-mediated proteolysis	AT4G08980
Vitvi07g02005	830.561	1.76334	0.317454	5.55462	2.78e-08	3.47e-07	Protein kinase SPK-3 ASK1	Signaling.Hormone Signaling.ABA Signaling.ABA-mediated Signaling pathway	AT1G10940
Vitvi07g02006	2268.14	4.46167	0.310187	14.3838	6.54e-47	6.42e-44	Patellin-1	Metabolism.Primary metabolism.Generation of metabolite precursors and energy.Storage proteins	AT4G09160
Vitvi07g02015	397.211	-1.31435	0.221014	-5.94692	2.73e-09	4.16e-08	Unknown protein	Unknown	AT5G10695
Vitvi07g02026	20.7283	2.85333	0.903841	3.15689	0.00159461	0.00610205	Lipase GDSL	Unclear	AT1G71250
Vitvi07g02029	2186.19	-1.63064	0.46508	-3.50615	0.000454635	0.00205828	Peroxidase ATP32, class III	Metabolism.Primary metabolism.Amino acid metabolism.Aromatic amino acid metabolism.Phenylalanine metabolism.Phenylalanine biosynthesis	AT4G33420
Vitvi07g02034	1067.17	1.24211	0.26346	4.7146	2.42e-06	1.98e-05	4,5-DOPA dioxygenase extradiol	Metabolism.Primary metabolism.Amino acid metabolism.Aromatic amino acid metabolism.Tyrosine metabolism	AT4G15093
Vitvi07g02041	546.432	1.48857	0.289526	5.14139	2.73e-07	2.77e-06	Esterase/lipase/thioesterase	Unclear	AT5G23530
Vitvi07g02042	221.894	1.78371	0.347756	5.1292	2.91e-07	2.95e-06	Esterase/lipase/thioesterase	Unclear	AT5G23530
Vitvi07g02049	2422.69	1.41157	0.392196	3.59916	0.00031925	0.00150972	Chloride channel protein (CLC-c)	Transport overview.Electrochemical Potential-driven Transporters.Porters.Chloride Carrier/Channel	AT5G49890
Vitvi07g02062	111.07	-2.41757	0.372824	-6.48447	8.9e-11	1.72e-09	Ethylene response factor ERF14	Signaling.Hormone Signaling.Ethylene Signaling.Ethylene-mediated Signaling pathway
Vitvi07g02066	954.031	-2.35093	0.471234	-4.98887	6.07e-07	5.73e-06	ERF/AP2 transcription factor sub B-1(ATERF-3)	Signaling.Hormone Signaling.Ethylene Signaling.Ethylene-mediated Signaling pathway	AT1G50640
Vitvi07g02073	518.688	2.00706	0.272576	7.36332	1.79e-13	5.3e-12	Short-root transcription factor (SHR)	Regulation overview.Regulation of gene expression.Regulation of transcription.Transcription factor.GRAS family transcription factor	AT4G37650
Vitvi07g02092	661.79	-1.28349	0.257058	-4.99299	5.95e-07	5.63e-06	RNA polymerase Rpb7 N-terminal domain-containing	Metabolism.Primary metabolism.Nucleobase, nucleoside, nucleotide, nucleic acid metabolism.Nucleic acid metabolism.RNA metabolism.RNA biosynthesis
Vitvi07g02097	454.119	5.12651	0.506419	10.1231	4.37e-24	4.54e-22	Histone H2A variant 1 HTA11	Cellular process.Cellular component organization and biogenesis.Nucleus.Chromosome organization and biogenesis.Chromatin assembly	AT3G54560
Vitvi07g02103	37.3134	8.47843	1.02418	8.27823	1.25e-16	5.66e-15	Ankyrin	Diverse functions.Gene family with diverse functions.Ankyrin domain family	AT3G18670
Vitvi07g02107	322.47	6.16372	1.0173	6.05888	1.37e-09	2.21e-08	Ankyrin	Diverse functions.Gene family with diverse functions.Ankyrin domain family	AT3G18670
Vitvi07g02109	16.2459	7.27928	1.14708	6.34591	2.21e-10	4.02e-09	Ankyrin	Transport overview.Accessory factors involved in transport.Auxiliary transport proteins.Ankyrin	AT3G18670
Vitvi07g02110	42.9998	8.68421	0.93899	9.24846	2.28e-20	1.55e-18	Ankyrin	Diverse functions.Gene family with diverse functions.Ankyrin domain family	AT3G18670
Vitvi07g02111	277.125	5.40214	0.653999	8.26017	1.45e-16	6.52e-15	Ankyrin	Diverse functions.Gene family with diverse functions.Ankyrin domain family	AT3G18670
Vitvi07g02112	37.2108	5.59608	0.71243	7.85492	4e-15	1.5e-13	Ankyrin	Diverse functions.Gene family with diverse functions.Ankyrin domain family	AT3G18670
Vitvi07g02118	5.24777	5.64997	1.75301	3.223	0.00126854	0.00499856	Ankyrin	Transport overview.Accessory factors involved in transport.Auxiliary transport proteins.Ankyrin	AT3G18670
Vitvi07g02122	16.3001	2.98291	1.09693	2.71933	0.00654136	0.0205085	Ankyrin	Transport overview.Accessory factors involved in transport.Auxiliary transport proteins.Ankyrin	AT3G18670
Vitvi07g02126	972.784	-1.13004	0.260069	-4.34516	1.39e-05	9.48e-05	No hit	No hit
Vitvi07g02127	153.455	1.41399	0.476199	2.96933	0.00298446	0.010446	Globulin-1 S allele precursor	Metabolism.Primary metabolism.Generation of metabolite precursors and energy.Storage proteins	AT3G22640
Vitvi07g02137	74.1494	1.9488	0.501876	3.88303	0.000103161	0.000559957	Patatin	Metabolism.Primary metabolism.Generation of metabolite precursors and energy.Storage proteins	AT3G63200
Vitvi07g02138	4617.82	-1.67631	0.200681	-8.35312	6.65e-17	3.14e-15	Outer envelope membrane protein	Unknown
Vitvi07g02143	610.809	2.46458	0.719792	3.42401	0.000617039	0.00268691	Endo-1,3;1,4-beta-D-glucanase precursor	Metabolism.Primary metabolism.Carbohydrate metabolism.Polysaccharide metabolism.Beta-1,3 glucan metabolism.Beta-1,3 glucan catabolism	AT3G23600
Vitvi07g02144	2703.7	1.40315	0.482395	2.90871	0.00362925	0.0123882	Endo-1,3;1,4-beta-D-glucanase precursor	Metabolism.Primary metabolism.Carbohydrate metabolism.Polysaccharide metabolism.Beta-1,3 glucan metabolism.Beta-1,3 glucan catabolism	AT3G23600
Vitvi07g02149	1243.3	1.3028	0.398439	3.26977	0.00107636	0.00433461	No hit	No hit
Vitvi07g02154	99.9139	-1.26185	0.353652	-3.56807	0.000359625	0.00167704	Oxidoreductase, aldo/keto reductase	Unclear	AT1G04420
Vitvi07g02156	42.4162	-3.04271	0.868522	-3.50332	0.000459506	0.00207688	No hit	No hit
Vitvi07g02170	37.8007	-1.06169	0.439358	-2.41646	0.0156723	0.0425533	Transcription termination factor mitochondrial mTERF	Regulation overview.Regulation of gene expression.Regulation of transcription.Transcription factor.MTERF	AT5G07900
Vitvi07g02183	64.6208	1.80159	0.672124	2.68044	0.0073525	0.0226286	HAK5 (High affinity K+ transporter 5)	Transport overview.Electrochemical Potential-driven Transporters.Porters.K+ uptake porter (aka permease)	AT4G13420
Vitvi07g02188	971.923	2.08252	0.364708	5.71009	1.13e-08	1.53e-07	Glutathione S-transferase 13 GSTF13	Metabolism.Primary metabolism.Coenzyme and prosthetic group metabolism.Peptide derived compounds biosynthesis.Glutathione metabolism	AT3G62760
Vitvi07g02189	214.009	3.97632	0.351571	11.3102	1.17e-29	2.21e-27	Glutathione S-transferase 13 GSTF13	Metabolism.Primary metabolism.Coenzyme and prosthetic group metabolism.Peptide derived compounds biosynthesis.Glutathione metabolism	AT3G62760
Vitvi07g02190	785.401	1.62449	0.202506	8.02193	1.04e-15	4.19e-14	Glutathione S-transferase 11 GSTF7	Metabolism.Primary metabolism.Coenzyme and prosthetic group metabolism.Peptide derived compounds biosynthesis.Glutathione metabolism	AT1G02920
Vitvi07g02193	7859.04	-1.23988	0.153032	-8.10209	5.4e-16	2.27e-14	No hit	No hit
Vitvi07g02194	778.987	2.06805	0.178512	11.585	4.91e-31	1.08e-28	Unknown	Unknown
Vitvi07g02200	24.6971	-3.09448	0.940138	-3.29151	0.000996503	0.00406304	Glycosyl hydrolase family 1 protein	Metabolism.Primary metabolism.Carbohydrate metabolism.Carbohydrate catabolism	AT1G45191
Vitvi07g02201	277.249	1.42767	0.462336	3.08796	0.00201537	0.00746751	Beta Glucosidase 11	Metabolism.Primary metabolism.Carbohydrate metabolism.Oligosaccharide metabolism.Glycan metabolism.Glycan catabolism	AT1G02850
Vitvi07g02207	37.2513	2.44152	0.735354	3.3202	0.000899544	0.00370964	No hit	No hit
Vitvi07g02212	237.119	5.39778	0.639166	8.44504	3.04e-17	1.49e-15	Histone H1	Cellular process.Cellular component organization and biogenesis.Nucleus.Chromosome organization and biogenesis.Chromatin assembly	AT2G30620
Vitvi07g02214	100.526	-2.04424	0.424668	-4.81374	1.48e-06	1.27e-05	GATA transcription factor 16	Regulation overview.Regulation of gene expression.Regulation of transcription.Transcription factor.C2C2-GATA family transcription factor	AT3G06740
Vitvi07g02221	566.219	-1.22486	0.331413	-3.69589	0.000219121	0.00108124	Unknown	Unknown
Vitvi07g02231	476.13	3.59704	0.454028	7.92252	2.33e-15	8.99e-14	Patatin	Metabolism.Primary metabolism.Generation of metabolite precursors and energy.Storage proteins	AT2G26560
Vitvi07g02233	19.4765	5.15699	1.05873	4.8709	1.11e-06	9.89e-06	Patatin	Metabolism.Primary metabolism.Generation of metabolite precursors and energy.Storage proteins	AT2G26560
Vitvi07g02239	29.9918	4.34145	1.04001	4.17445	2.99e-05	0.000186724	Patatin	Metabolism.Primary metabolism.Generation of metabolite precursors and energy.Storage proteins	AT2G26560
Vitvi07g02242	1119.49	-3.59123	0.530812	-6.76554	1.33e-11	2.95e-10	Glycosyl transferase family 8 protein	Metabolism.Primary metabolism.Carbohydrate metabolism.Glycosyl transference	AT2G47180
Vitvi07g02243	2246.75	2.37389	0.349543	6.79141	1.11e-11	2.49e-10	No hit	No hit
Vitvi07g02244	1688.42	2.08309	0.328148	6.34801	2.18e-10	3.97e-09	No hit	No hit
Vitvi07g02246	708.171	2.08722	0.494205	4.22338	2.41e-05	0.000153689	LHCII type I CAB-1	Metabolism.Primary metabolism.Generation of metabolite precursors and energy.Photosynthesis.Antenna proteins	AT1G29930
Vitvi07g02251	126.049	1.89747	0.633272	2.9963	0.00273279	0.00969099	Phytochrome interacting factor 3 (PIF3)	Signaling.Signaling pathway.Circadian clock Signaling	AT1G09530
Vitvi07g02290	35.1535	1.08583	0.374414	2.90008	0.00373067	0.0126973	Leucine Rich Repeat receptor-like kinase	Signaling.Signaling pathway.Protein kinase	AT4G08850
Vitvi07g02299	252.944	-1.14222	0.387085	-2.95083	0.00316924	0.0110111	Blight-associated protein p12 precursor	Response to stimulus.Stress response.Biotic stress response	AT4G30380
Vitvi07g02304	41.1383	-1.1986	0.498095	-2.40638	0.0161116	0.0435484	ABC transporter C member 9	Transport overview.Macromolecule transport.Multidrug transport.Multidrug ABC transport	AT1G04120
Vitvi07g02342	57.3946	-3.19911	1.03522	-3.09027	0.00199971	0.00741847	Unknown	Unknown
Vitvi07g02357	90.0418	3.11721	0.611981	5.09364	3.51e-07	3.48e-06	Pore-forming toxin-like protein Hfr-2	Transport overview.Channels and pores.Pore-forming toxins.Aerolysin Channel-forming Toxin
Vitvi07g02360	16.737	7.32307	0.990727	7.39161	1.45e-13	4.37e-12	Pore-forming toxin-like protein Hfr-2	Transport overview.Channels and pores.Pore-forming toxins.Aerolysin Channel-forming Toxin
Vitvi07g02364	3675.8	1.64054	0.2944	5.57247	2.51e-08	3.16e-07	No hit	No hit
Vitvi07g02389	5.5289	4.27772	1.78364	2.3983	0.0164713	0.0443739	Serine/threonine kinase BRLK	Signaling.Signaling pathway.Protein kinase	AT4G21390
Vitvi07g02414	403.566	-1.16536	0.235667	-4.94495	7.62e-07	7.04e-06	No hit	No hit
Vitvi07g02425	20.5388	2.59807	0.990299	2.62352	0.00870262	0.0260739	R protein L6	Response to stimulus.Stress response.Biotic stress response.Plant-pathogen interaction.R proteins from Plant-pathogen interaction	AT5G17680
Vitvi07g02443	164.733	6.57097	1.40662	4.67145	2.99e-06	2.39e-05	DIR1 (defective IN induced resistance 1)	Response to stimulus.Stress response.Biotic stress response
Vitvi07g02461	3.29639	4.4596	1.52394	2.92636	0.00342953	0.01181	Ankyrin	Transport overview.Accessory factors involved in transport.Auxiliary transport proteins.Ankyrin	AT5G04730
Vitvi07g02462	205.224	1.66899	0.404383	4.12726	3.67e-05	0.000224729	Ankyrin repeat protein family	Transport overview.Accessory factors involved in transport.Auxiliary transport proteins.Ankyrin
Vitvi07g02476	42.6929	2.61994	0.694922	3.77012	0.000163169	0.000835047	No hit	No hit
Vitvi07g02505	13.6357	2.21907	0.786471	2.82155	0.00477915	0.0156575	No hit	No hit
Vitvi07g02513	849.276	1.75341	0.435232	4.02869	5.61e-05	0.000325172	Methyl jasmonate esterase	Metabolism.Primary metabolism.Lipid metabolism.Fatty acid metabolism.Alpha-linolenic acid metabolism	AT3G50440
Vitvi07g02521	346.342	-1.02215	0.256065	-3.99175	6.56e-05	0.000373786	R protein disease resistance protein	Response to stimulus.Stress response.Biotic stress response.Plant-pathogen interaction.R proteins from Plant-pathogen interaction	AT5G66900
Vitvi07g02522	103.95	-2.38337	0.615385	-3.87298	0.000107514	0.00058114	Disease resistance protein (CC-NBS-LRR class)	Diverse functions.Gene family with diverse functions.NBS-LRR superfamily	AT5G66630
Vitvi07g02523	377.722	-3.09092	0.405661	-7.61947	2.55e-14	8.55e-13	R protein disease resistance protein	Response to stimulus.Stress response.Biotic stress response.Plant-pathogen interaction.R proteins from Plant-pathogen interaction	AT5G66900
Vitvi07g02528	79.6637	1.03918	0.391857	2.65193	0.00800326	0.0243181	R protein disease resistance protein	Response to stimulus.Stress response.Biotic stress response.Plant-pathogen interaction.R proteins from Plant-pathogen interaction	AT5G66900
Vitvi07g02557	467.913	1.53878	0.21508	7.15443	8.4e-13	2.25e-11	Leucine-rich repeat family protein	Diverse functions.Gene family with diverse functions.NBS-LRR superfamily	AT5G10290
Vitvi07g02559	90.9809	-1.06053	0.248834	-4.26199	2.03e-05	0.000132428	UDP-glucoronosyl and UDP-glucosyl transferase	Unclear	AT1G22370
Vitvi07g02564	161.145	3.12887	0.456044	6.86089	6.84e-12	1.59e-10	UDP-rhamnose:rhamnosyltransferase	Metabolism.Secondary metabolism.Phenylpropanoid metabolism.Flavonoid metabolism.Flavonoid biosynthesis.Anthocyanin biosynthesis.Anthocyanin-glycoside biosynthesis	AT5G65550
Vitvi07g02574	5.80051	5.7935	2.0196	2.86865	0.00412234	0.0138251	Centromere protein	Cellular process.Cell growth and death	AT4G38070
Vitvi07g02593	26.3763	-2.38183	0.582658	-4.08788	4.35e-05	0.000260832	Unknown	Unknown
Vitvi07g02605	831.652	-2.56047	0.679037	-3.77074	0.000162767	0.000833335	ABC transporter G member 7	Transport overview.Macromolecule transport.Multidrug transport.Multidrug ABC transport	AT1G17840
Vitvi07g02609	93.616	-1.69476	0.507301	-3.34074	0.000835557	0.00348739	Unknown	Unknown
Vitvi07g02611	3350.87	2.23854	0.194982	11.4808	1.65e-30	3.34e-28	No hit	No hit
Vitvi07g02613	1559.97	1.0045	0.34786	2.88765	0.00388134	0.0131137	Basic helix-loop-helix (bHLH) family	Regulation overview.Regulation of gene expression.Regulation of transcription.Transcription factor.bHLH family transcription factor	AT5G65640
Vitvi07g02641	22.8742	2.11006	0.843391	2.50187	0.0123538	0.0349207	CYP81E8	Metabolism.Cellular metabolism.Oxidation reduction.Cytochrome P450 oxidoreductase	AT5G36220
Vitvi07g02646	49.6048	2.46417	0.846588	2.91071	0.00360607	0.0123314	Protein kinase	Signaling.Signaling pathway.Protein kinase
Vitvi07g02647	136.325	1.99944	0.342317	5.84091	5.19e-09	7.51e-08	Protein kinase	Signaling.Signaling pathway.Protein kinase
Vitvi07g02649	185.485	1.91736	0.43583	4.39934	1.09e-05	7.61e-05	Protein kinase	Signaling.Signaling pathway.Protein kinase	AT2G23200
Vitvi07g02674	61.5717	2.66014	0.841047	3.16289	0.00156211	0.0059889	L-ascorbate oxidase	Metabolism.Primary metabolism.Organic acid metabolism.Ascorbate and aldarate metabolism	AT4G39830
Vitvi07g02676	80.6442	2.45114	0.804262	3.04769	0.00230609	0.00837891	L-ascorbate oxidase	Metabolism.Primary metabolism.Organic acid metabolism.Ascorbate and aldarate metabolism	AT4G39830
Vitvi07g02677	13.63	4.00315	1.36891	2.92434	0.00345191	0.0118621	Ascorbate oxidase	Metabolism.Primary metabolism.Organic acid metabolism.Ascorbate and aldarate metabolism	AT4G39830
Vitvi07g02686	3320.97	2.68155	0.60027	4.46725	7.92e-06	5.75e-05	ferulate 5-hydroxylase	Metabolism.Secondary metabolism.Phenylpropanoid metabolism.Phenylpropanoid biosynthesis	AT4G36220
Vitvi07g02692	339.304	1.51657	0.422298	3.59123	0.000329122	0.00155221	CYP86A2	Metabolism.Cellular metabolism.Oxidation reduction.Cytochrome P450 oxidoreductase	AT4G39490
Vitvi07g02701	47.0922	4.14081	1.29791	3.19038	0.00142087	0.00553389	No hit	No hit
Vitvi07g02707	1075.51	-1.607	0.23756	-6.76461	1.34e-11	2.97e-10	Unknown	Unknown
Vitvi07g02734	29.3455	2.45813	0.871552	2.82041	0.00479629	0.0157011	TIR-NBS-LRR disease resistance	Diverse functions.Gene family with diverse functions.NBS-LRR superfamily
Vitvi07g02751	5.82991	3.89629	1.59577	2.44163	0.0146212	0.0401392	Anthranilate N-benzoyltransferase protein 1	Metabolism.Primary metabolism.Amino acid metabolism.Aromatic amino acid metabolism.Aromatic amino acid biosynthesis
Vitvi07g02752	241.771	1.81298	0.305704	5.93052	3.02e-09	4.54e-08	Ubiquitin-associated (UBA)/TS-N domain-containing protein	Unclear	AT1G04850
Vitvi07g02753	955.36	-1.12625	0.281971	-3.9942	6.49e-05	0.000370554	Unknown protein	Unknown	AT3G07150
Vitvi07g02789	2829.49	2.73196	0.270425	10.1025	5.39e-24	5.46e-22	Zinc finger (C3HC4-type ring finger)	Regulation overview.Regulation of gene expression.Regulation of transcription.Transcription factor.Zinc finger C3HC4 family transcription factor	AT4G13100
Vitvi07g02798	695.489	-1.73649	0.171583	-10.1204	4.49e-24	4.64e-22	Membrane bound O-acyl transferase (MBOAT)	Transport overview.Electrochemical Potential-driven Transporters.Porters.Glycerol Uptake	AT1G57600
Vitvi07g02800	128.147	-1.77394	0.398597	-4.45046	8.57e-06	6.17e-05	Membrane bound O-acyl transferase (MBOAT)	Transport overview.Electrochemical Potential-driven Transporters.Porters.Glycerol Uptake	AT1G57600
Vitvi07g02811	366.766	1.21652	0.260428	4.67122	2.99e-06	2.4e-05	Unknown	Unknown
Vitvi07g02812	19.0873	4.70894	1.22316	3.84983	0.0001182	0.000631113	TIR-NBS-LRR disease resistance	Diverse functions.Gene family with diverse functions.NBS-LRR superfamily
Vitvi07g02828	52.0193	1.21919	0.392996	3.10229	0.00192031	0.00717165	No hit	No hit
Vitvi07g02831	48.0759	2.00093	0.538564	3.71531	0.000202958	0.00101083	No hit	No hit
Vitvi07g02832	40.3093	2.57152	1.04819	2.45329	0.0141555	0.0390751	TIR-NBS-TIR type disease resistance protein	Diverse functions.Gene family with diverse functions.NBS-LRR superfamily	AT4G12010
Vitvi07g02841	7.02877	4.04725	1.53815	2.63124	0.00850735	0.025592	No hit	No hit
Vitvi07g02847	249.83	2.34955	0.563829	4.16713	3.08e-05	0.000192178	DnaJ homolog, subfamily A, member 2	Transport overview.Primary Active Transporters.P-P-bond hydrolysis-driven transporters.General Secretory Pathway (Sec)	AT4G13830
Vitvi07g02881	1956.2	1.11966	0.308207	3.63282	0.000280341	0.00134596	Auxin-responsive protein	Signaling.Hormone Signaling.Auxin Signaling.Auxin-mediated Signaling pathway	AT4G12980
Vitvi07g02895	424.479	-1.13317	0.156316	-7.24922	4.19e-13	1.18e-11	No hit	No hit
Vitvi07g02943	684.466	1.34202	0.28298	4.74247	2.11e-06	1.75e-05	No hit	No hit
Vitvi07g02946	63.9582	1.4241	0.307406	4.63263	3.61e-06	2.83e-05	Histidine triad family protein / HIT family protein	Metabolism.Primary metabolism.Nucleobase, nucleoside, nucleotide, nucleic acid metabolism.Nucleic acid metabolism.RNA metabolism.RNA catabolism	AT5G48545
Vitvi07g02951	1018.4	-2.2181	0.349861	-6.33994	2.3e-10	4.17e-09	Unknown protein	Unknown	AT3G07350
Vitvi07g02954	640.745	-1.20175	0.174302	-6.89464	5.4e-12	1.27e-10	Unknown protein	Unknown	AT3G07440
Vitvi07g02983	1151.2	6.05704	0.426463	14.203	8.78e-46	7.69e-43	Unknown protein	Unknown	AT5G16250
Vitvi07g02990	699.014	2.3847	0.427182	5.58242	2.37e-08	3.01e-07	Endo-1,4-beta-glucanase korrigan (KOR)	Cellular process.Cellular component organization and biogenesis.Cell wall organization and biogenesis.Cell wall metabolism.Cell wall catabolism.Cellulose catabolism	AT1G65610
Vitvi07g03002	343.582	1.03893	0.23215	4.47525	7.63e-06	5.57e-05	Ankyrin	Diverse functions.Gene family with diverse functions.Ankyrin domain family	AT5G04730
Vitvi07g03006	197.169	1.10628	0.220244	5.023	5.09e-07	4.87e-06	Ankyrin repeat protein	Diverse functions.Gene family with diverse functions.Ankyrin domain family
Vitvi07g03010	17.8372	1.41847	0.57372	2.4724	0.0134208	0.037341	Ankyrin	Transport overview.Accessory factors involved in transport.Auxiliary transport proteins.Ankyrin
Vitvi07g03027	58.8567	1.93468	0.613652	3.15273	0.00161753	0.00617819	Unknown protein	Unknown	AT5G10110
Vitvi07g03029	1244.02	1.68502	0.250966	6.71414	1.89e-11	4.06e-10	Ethylene-responsive transcription factor related to APETALA2 4	Signaling.Hormone Signaling.Ethylene Signaling.Ethylene-mediated Signaling pathway
Vitvi07g03030	3926.74	1.34996	0.267356	5.04931	4.43e-07	4.3e-06	Integral membrane family protein	Unknown
Vitvi07g03032	10.8592	2.95369	0.905788	3.2609	0.00111059	0.00445196	Brassinosteroid insensitive 1-associated receptor kinase 1	Signaling.Hormone Signaling.Brassinosteroid Signaling.Brassinosteroid-mediated Signaling pathway
Vitvi07g03036	6.08362	-2.70166	1.0039	-2.69115	0.00712057	0.022058	Brassinosteroid insensitive 1-associated receptor kinase 1	Signaling.Hormone Signaling.Brassinosteroid Signaling.Brassinosteroid-mediated Signaling pathway
Vitvi07g03052	1.86734	3.61761	1.42754	2.53415	0.011272	0.0323494	RAB GTPase RABA4A	Cellular process.Cellular transport.Protein trafficking.Vesicle-mediated trafficking	AT5G65270
Vitvi07g03053	1358.31	-2.43089	0.811494	-2.99558	0.00273926	0.00970994	ABC transporter G member 7	Transport overview.Macromolecule transport.Multidrug transport.Multidrug ABC transport	AT1G17840
Vitvi07g03060	7041.52	3.38578	0.591581	5.72327	1.04e-08	1.42e-07	No hit	No hit
Vitvi07g03083	853.023	1.27315	0.34139	3.72931	0.000192002	0.00096213	Mannitol dehydrogenase (ELI3-1)	Metabolism.Primary metabolism.Carbohydrate metabolism.Monosaccharide metabolism.Fructose and mannose metabolism	AT4G37990
Vitvi07g03135	135.081	1.98548	0.468449	4.2384	2.25e-05	0.000145083	Receptor protein kinase	Signaling.Signaling pathway.Protein kinase	AT5G54380
Vitvi07g03168	8.63274	6.36752	1.23535	5.15442	2.54e-07	2.61e-06	TRNA synthetase, class II (D, K and N); Nucleic acid-binding, OB-fold	Metabolism.Primary metabolism.Amino acid metabolism.Lysine metabolism.Lysine biosynthesis	AT3G07420
Vitvi07g03170	3.2021	4.93838	1.74716	2.82651	0.00470579	0.0154647	No hit	No hit
Vitvi08g00007	428.832	2.01653	0.387422	5.20498	1.94e-07	2.03e-06	Scarecrow transcription factor 23 (SCL23)	Regulation overview.Regulation of gene expression.Regulation of transcription.Transcription factor.GRAS family transcription factor	AT3G54220
Vitvi08g00014	119.208	2.70179	0.746489	3.61933	0.000295371	0.00140984	Unknown protein	Unknown	AT1G80120
Vitvi08g00019	405.901	3.88394	0.509701	7.62004	2.54e-14	8.52e-13	Cyclin-dependent kinase B1;2	Cellular process.Cell growth and death	AT2G38620
Vitvi08g00054	206.104	2.16042	0.620805	3.48003	0.000501358	0.00224171	Acid phosphatase	Metabolism.Primary metabolism.Coenzyme and prosthetic group metabolism.Riboflavin metabolism	AT2G38600
Vitvi08g00055	690.882	1.26078	0.260256	4.8444	1.27e-06	1.11e-05	Transposon protein, CACTA, En/Spm sub-class	Transposable elements viral and plasmid proteins.Protein from transposable element	AT3G08670
Vitvi08g00060	27.3765	6.57266	1.2775	5.14496	2.68e-07	2.73e-06	Phytochrome kinase substrate 1,	Response to stimulus.Stress response.Biotic stress response	AT5G04190
Vitvi08g00061	2692.05	-1.06823	0.168434	-6.34209	2.27e-10	4.12e-09	SEC14 cytosolic factor	Transport overview.Electrochemical Potential-driven Transporters.Porters.Drug/Metabolite Transporter.Triose-phosphate Transporter	AT1G22180
Vitvi08g00067	316.493	2.25174	0.426068	5.28494	1.26e-07	1.38e-06	MATE efflux family protein	Transport overview.Electrochemical Potential-driven Transporters.Porters.Multidrug/Oligosaccharidyl-lipid/Polysaccharide Flippase.Multi Antimicrobial Extrusion	AT1G33110
Vitvi08g00069	69.1732	2.94829	0.734772	4.01252	6.01e-05	0.000345746	Myb domain protein 60	Regulation overview.Regulation of gene expression.Regulation of transcription.Transcription factor.MYB family transcription factor	AT1G08810
Vitvi08g00091	570.741	2.63701	0.661617	3.9857	6.73e-05	0.000382815	MATE efflux family protein	Transport overview.Electrochemical Potential-driven Transporters.Porters.Multidrug/Oligosaccharidyl-lipid/Polysaccharide Flippase.Multi Antimicrobial Extrusion	AT5G17700
Vitvi08g00101	53.867	1.72447	0.636132	2.71086	0.00671081	0.0209801	Exostosin	Metabolism.Primary metabolism.Carbohydrate metabolism.Oligosaccharide metabolism.Glycan metabolism.Glycan structures-biosynthesis1	AT3G45400
Vitvi08g00103	286.426	1.69609	0.475012	3.57062	0.000356139	0.00166268	BDG1 (BODYGUARD1) hydrolase	Unknown	AT5G17780
Vitvi08g00108	2.94751	4.8124	1.75357	2.74434	0.00606334	0.0192279	Wuschel related homeobox 12	Regulation overview.Regulation of gene expression.Regulation of transcription.Transcription factor.Homeobox domain family transcription factor	AT3G03660
Vitvi08g00110	373.6	1.43394	0.326812	4.38766	1.15e-05	7.96e-05	Cycling DOF factor 2	Regulation overview.Regulation of gene expression.Regulation of transcription.Transcription factor.C2C2-DOF family transcription factor	AT5G39660
Vitvi08g00133	109.041	4.43962	0.391759	11.3325	9.06e-30	1.74e-27	Anthranilate phosphoribosyltransferase	Metabolism.Primary metabolism.Amino acid metabolism.Aromatic amino acid metabolism.Aromatic amino acid biosynthesis	AT3G03680
Vitvi08g00138	167298	-2.08677	0.279912	-7.45512	8.98e-14	2.81e-12	No hit	No hit
Vitvi08g00161	211.388	4.0937	0.606487	6.74985	1.48e-11	3.24e-10	Heat shock HSP20 family protein	Metabolism.Primary metabolism.Protein metabolism and modification.Protein folding.Chaperone-mediated protein folding.HSP-mediated protein folding
Vitvi08g00174	1358.88	1.26993	0.163503	7.767	8.04e-15	2.87e-13	RNA-binding region RNP-1	Unknown	AT5G32450
Vitvi08g00193	647.371	3.03885	0.262745	11.5658	6.14e-31	1.3e-28	Phosphoribosylanthranilate transferase	Metabolism.Primary metabolism.Amino acid metabolism.Aromatic amino acid metabolism.Aromatic amino acid biosynthesis	AT5G17980
Vitvi08g00202	126.023	1.83504	0.322616	5.688	1.29e-08	1.72e-07	Unknown	Unknown
Vitvi08g00207	550.657	-1.21217	0.380644	-3.18452	0.00144996	0.00562842	SPX (SYG1/Pho81/XPR1) domain-containing protein	Unknown	AT2G38920
Vitvi08g00221	386.232	1.65265	0.264568	6.24661	4.19e-10	7.3e-09	Calcium-dependent protein kinase 20 CPK20	Response to stimulus.Stress response.Biotic stress response.Plant-pathogen interaction	AT2G38910
Vitvi08g00233	125.122	1.44923	0.282	5.13911	2.76e-07	2.81e-06	Alpha-L-arabinosidase	Metabolism.Primary metabolism.Carbohydrate metabolism.Monosaccharide metabolism.Nucleotide sugar metabolism	AT5G64570
Vitvi08g00243	191.152	-2.24407	0.269308	-8.33272	7.9e-17	3.69e-15	Unknown protein	Unknown	AT3G52360
Vitvi08g00261	51.2953	2.68892	0.992596	2.70898	0.00674908	0.0210781	Glutaredoxin	Response to stimulus.Stress response.Abiotic stress response.Oxidative stress response	AT5G06470
Vitvi08g00292	1925.28	-1.23304	0.392902	-3.13829	0.00169936	0.00644804	Nuclear transcription factor Y subunit A-10	Regulation overview.Regulation of gene expression.Regulation of transcription.Transcription factor.CCAAT family transcription factor.HAP3-type-type	AT5G06510
Vitvi08g00298	1114.91	-2.27921	0.409812	-5.5616	2.67e-08	3.35e-07	Calcium dependent protein kinase 1	Response to stimulus.Stress response.Biotic stress response.Plant-pathogen interaction	AT5G04870
Vitvi08g00630	100.7	4.13853	0.920511	4.4959	6.93e-06	5.1e-05	U-box domain-containing protein	Unknown	AT3G11840
Vitvi08g00656	1270.36	3.29559	0.548813	6.00495	1.91e-09	3e-08	Leucoanthocyanidin dioxygenase	Metabolism.Secondary metabolism.Phenylpropanoid metabolism.Flavonoid metabolism.Flavonoid biosynthesis.Anthocyanin biosynthesis	AT3G11180
Vitvi08g00662	1111.99	3.22314	0.409465	7.87159	3.5e-15	1.32e-13	Omega-3 fatty acid desaturase, chloroplast precursor	Metabolism.Primary metabolism.Lipid metabolism.Fatty acid metabolism.Fatty acid biosynthesis.Unsaturated fatty acid biosynthesis	AT5G05580
Vitvi08g00669	416.322	-2.35371	0.203195	-11.5835	5e-31	1.08e-28	PHD finger-like domain-containing protein 5A	Metabolism.Primary metabolism.Nucleobase, nucleoside, nucleotide, nucleic acid metabolism.Nucleic acid metabolism.RNA metabolism.RNA processing.mRNA processing.mRNA splicing	AT2G30000
Vitvi08g00673	107.241	1.5534	0.394607	3.93658	8.27e-05	0.000460337	Unknown protein	Unknown	AT5G01360
Vitvi08g00703	397.609	1.88893	0.538322	3.50893	0.000449912	0.0020399	Verticillium wilt disease resistance protein Ve2	Response to stimulus.Stress response.Biotic stress response	AT1G45616
Vitvi08g00726	606.424	-1.7396	0.342305	-5.08202	3.73e-07	3.67e-06	Nudix hydrolase 15, mitochondrial precursor (AtNUDT15)	Metabolism.Primary metabolism.Nucleobase, nucleoside, nucleotide, nucleic acid metabolism.Nudix hydrolase family	AT1G28960
Vitvi08g00744	161.937	4.12262	1.49613	2.75552	0.00585983	0.0186791	Receptor lectin protein kinase	Signaling.Signaling pathway.Protein kinase	AT5G01560
Vitvi08g00754	34.789	4.05408	1.04614	3.87527	0.000106508	0.000576208	OAS high accumulation 1 OSH1	Unclear	AT5G01580
Vitvi08g00756	160.613	-3.1401	0.450587	-6.9689	3.19e-12	7.84e-11	No hit	No hit
Vitvi08g00763	63.4432	-1.98449	0.671247	-2.95643	0.00311225	0.0108361	ferritin	Metabolism.Primary metabolism.Cofactor metabolism.Tetrapyrrole metabolism	AT5G01600
Vitvi08g00768	812.753	1.07994	0.248892	4.339	1.43e-05	9.7e-05	Abscisic acid receptor PYL4 RCAR10	Signaling.Hormone Signaling.ABA Signaling.ABA-mediated Signaling pathway	AT2G38310
Vitvi08g00769	120.352	1.73519	0.353307	4.91129	9.05e-07	8.21e-06	Unknown protein	Unknown	AT2G38320
Vitvi08g00781	197.503	6.09132	0.713052	8.5426	1.31e-17	6.68e-16	IMK2 (inflorescence meristem receptor-like kinase 2)	Signaling.Signaling pathway.Protein kinase	AT3G51740
Vitvi08g00784	4500.23	-1.19962	0.176315	-6.80388	1.02e-11	2.3e-10	Macrophage migration inhibitory factor	Unknown	AT3G51660
Vitvi08g00788	6646.3	2.72111	0.254257	10.7022	9.94e-27	1.4e-24	Patellin-5	Metabolism.Primary metabolism.Generation of metabolite precursors and energy.Storage proteins	AT3G51670
Vitvi08g00795	197.964	-1.65834	0.365167	-4.54133	5.59e-06	4.18e-05	No hit	No hit
Vitvi08g00813	1323.45	-1.23409	0.391856	-3.14934	0.00163641	0.00624349	RAPTOR1B (RAPTOR1)	Signaling.Signaling pathway.TOR Signaling pathway	AT3G08850
Vitvi08g00820	305.708	2.53545	0.346244	7.32274	2.43e-13	7.07e-12	Basic helix-loop-helix (bHLH) family	Regulation overview.Regulation of gene expression.Regulation of transcription.Transcription factor.bHLH family transcription factor	AT2G40435
Vitvi08g00821	1661.62	2.77192	0.42014	6.59762	4.18e-11	8.55e-10	Cationic peroxidase	Metabolism.Primary metabolism.Amino acid metabolism.Aromatic amino acid metabolism.Phenylalanine metabolism.Phenylalanine biosynthesis	AT5G05340
Vitvi08g00822	363.629	3.37434	0.58915	5.72747	1.02e-08	1.39e-07	Cationic peroxidase	Metabolism.Primary metabolism.Amino acid metabolism.Aromatic amino acid metabolism.Phenylalanine metabolism.Phenylalanine biosynthesis	AT5G05340
Vitvi08g00823	753.207	2.61177	0.609577	4.28456	1.83e-05	0.000120766	Peroxidase	Metabolism.Primary metabolism.Amino acid metabolism.Aromatic amino acid metabolism.Phenylalanine metabolism.Phenylalanine biosynthesis	AT5G05340
Vitvi08g00825	190.018	3.2764	0.384084	8.53044	1.46e-17	7.37e-16	Saposin B domain-containing protein	Transport overview.Channels and pores.Pore-forming toxins.Amoebapore	AT3G51730
Vitvi08g00827	476.092	8.1815	1.48187	5.52107	3.37e-08	4.14e-07	Saposin B domain-containing protein	Transport overview.Channels and pores.Pore-forming toxins.Amoebapore	AT5G01800
Vitvi08g00835	401.994	1.3808	0.471112	2.93095	0.00337929	0.0116501	CBL-interacting protein kinase 14 (CIPK14)	Signaling.Signaling pathway.Protein kinase	AT5G01820
Vitvi08g00840	1021.57	2.21034	0.392689	5.62873	1.82e-08	2.36e-07	No hit	No hit
Vitvi08g00843	1550.65	1.25845	0.335639	3.74942	0.000177241	0.000896995	WNK5 (Arabidopsis WNK kinase 5)	Development.Reproductive development.Flower development	AT3G51630
Vitvi08g00853	1378.66	-3.31594	1.15317	-2.87549	0.00403396	0.0135639	Non-specific lipid transfer protein LTP1	Transport overview.Macromolecule transport.Lipid transport	AT2G38540
Vitvi08g00854	17132.9	2.45313	0.929311	2.63973	0.00829717	0.0250334	No hit	No hit
Vitvi08g00857	377.746	-1.1127	0.363084	-3.06459	0.0021797	0.00798235	Zinc finger (C3HC4-type ring finger)	Regulation overview.Regulation of gene expression.Regulation of transcription.Transcription factor.Zinc finger C3HC4 family transcription factor	AT3G10910
Vitvi08g00863	386.585	1.74348	0.232716	7.49186	6.79e-14	2.16e-12	Leucine-rich repeat transmembrane protein kinase	Signaling.Signaling pathway.Protein kinase	AT3G56370
Vitvi08g00868	5390.45	2.85726	0.375894	7.60124	2.93e-14	9.72e-13	WRKY DNA-binding protein 70	Regulation overview.Regulation of gene expression.Regulation of transcription.Transcription factor.WRKY family transcription factor	AT3G56400
Vitvi08g00871	83.9821	5.52561	0.608409	9.08206	1.07e-19	6.88e-18	Unknown protein	Unknown	AT5G01910
Vitvi08g00875	350.111	1.81772	0.422411	4.3032	1.68e-05	0.000112091	1,4-beta-mannan endohydrolase	Metabolism.Primary metabolism.Carbohydrate metabolism.Monosaccharide metabolism.Fructose and mannose metabolism	AT5G01930
Vitvi08g00883	560.881	3.09849	0.314023	9.86707	5.78e-23	5.33e-21	Receptor protein kinase	Signaling.Signaling pathway.Protein kinase	AT5G58300
Vitvi08g00903	4301.04	2.05094	0.362595	5.65629	1.55e-08	2.04e-07	No hit	No hit
Vitvi08g00910	108.596	4.00239	0.717655	5.57704	2.45e-08	3.09e-07	Unknown	Unknown
Vitvi08g00911	121.973	2.84113	0.69233	4.10373	4.07e-05	0.000245923	Caspase	Metabolism.Primary metabolism.Protein metabolism and modification.Proteolysis.Peptidase-mediated proteolysis	AT5G04200
Vitvi08g00930	6355.25	-2.0135	0.206349	-9.75772	1.71e-22	1.49e-20	4-alpha-glucanotransferase	Metabolism.Primary metabolism.Carbohydrate metabolism.Polysaccharide metabolism.Starch and sucrose metabolism.Starch biosynthesis catabolism.Starch branching	AT2G40840
Vitvi08g00935	1398.51	-1.51617	0.303893	-4.98917	6.06e-07	5.73e-06	Snf1 protein kinase (KIN10) (SKIN10)	Signaling.Signaling pathway.Protein kinase	AT3G01090
Vitvi08g00936	103.012	1.57957	0.410124	3.85146	0.000117418	0.000627891	CTV.22	Unknown	AT1G15780
Vitvi08g00940	16786.8	-1.08933	0.325258	-3.34912	0.000810692	0.00340097	P-coumaroyl shikimate 3'-hydroxylase isoform 1	Metabolism.Secondary metabolism.Phenylpropanoid metabolism.Phenylpropanoid biosynthesis	AT2G40890
Vitvi08g00944	42.1515	3.20751	0.931535	3.44325	0.000574766	0.00252751	CYP94A1	Metabolism.Cellular metabolism.Oxidation reduction.Cytochrome P450 oxidoreductase	AT3G56630
Vitvi08g00945	1006.98	1.352	0.453502	2.98124	0.0028708	0.0101088	Proton-dependent oligopeptide transport (POT) family protein	Transport overview.Electrochemical Potential-driven Transporters.Porters.Proton-dependent Oligopeptide Transporter	AT1G68570
Vitvi08g00947	115.296	1.67237	0.553929	3.01911	0.00253519	0.00908429	Thylakoid lumenal 20 kDa protein	Unknown	AT3G56650
Vitvi08g00958	300.683	5.78336	0.36547	15.8244	2.11e-56	4.32e-53	Cyclin B-type	Cellular process.Cell growth and death	AT5G06150
Vitvi08g00960	806.436	1.90907	0.198902	9.59806	8.15e-22	6.66e-20	Plectin (myosin-like)	Cellular process.Cellular component organization and biogenesis.Cytoskeleton organization and biogenesis	AT2G26770
Vitvi08g00977	139.679	2.69464	0.425707	6.32981	2.45e-10	4.44e-09	Auxin efflux carrier protein 10	Signaling.Hormone Signaling.Auxin Signaling.Auxin transport	AT1G73590
Vitvi08g00978	337.576	1.43993	0.35031	4.11045	3.95e-05	0.000239997	Auxin transport protein (PIN3)	Signaling.Hormone Signaling.Auxin Signaling.Auxin transport	AT1G73590
Vitvi08g00986	580.307	-1.0573	0.395972	-2.67013	0.00758211	0.0232061	F-box family protein	Metabolism.Primary metabolism.Protein metabolism and modification.Proteolysis.cytoplasmic and nuclear protein degradation.Ubiquitin-mediated proteolysis	AT2G32560
Vitvi08g00999	353.732	-1.67943	0.316915	-5.29929	1.16e-07	1.28e-06	TRNA (guanine-N(7)-)-methyltransferase	Metabolism.Primary metabolism.Amino acid metabolism.Methionine metabolism	AT3G12780
Vitvi08g01001	450.508	1.46195	0.409286	3.57196	0.000354326	0.00165537	Cis-zeatin O-beta-D-glucosyltransferase	Signaling.Hormone Signaling.Cytokinin Signaling.Cytokinin metabolism.Cytokinin inactivation by glycosylation	AT2G36970
Vitvi08g01004	32.0221	-5.90445	1.07348	-5.50028	3.79e-08	4.61e-07	High-affinity nitrate transporter 2.4	Transport overview.Electrochemical Potential-driven Transporters.Porters.Major Facilitator Superfamily.Nitrate/Nitrite Porter	AT5G60770
Vitvi08g01006	66.021	2.55419	0.629006	4.06067	4.89e-05	0.000288521	Indole-3-acetate beta-glucosyltransferase	Signaling.Hormone Signaling.Auxin Signaling.Auxin metabolism.Auxin inactivation by conjugation	AT2G36780
Vitvi08g01031	4.76085	4.99851	1.45047	3.44614	0.000568658	0.00250649	Laccase (diphenol oxidase)-like protein	Metabolism.single reactions	AT5G03260
Vitvi08g01032	4.33967	5.3746	2.15439	2.49472	0.0126056	0.0354836	BTB/POZ; NPH3	Metabolism.Primary metabolism.Protein metabolism and modification.Proteolysis.cytoplasmic and nuclear protein degradation.Ubiquitin-mediated proteolysis	AT5G03250
Vitvi08g01038	3597.51	2.39384	0.365747	6.54508	5.95e-11	1.18e-09	Aquaporin PIP2;4	Transport overview.Channels and pores.a-Type channels.Major Intrinsic Protein	AT5G60660
Vitvi08g01040	112.061	1.25159	0.469107	2.66802	0.00762989	0.02333	Crinkly4	Signaling.Signaling pathway.Calcium sensors and Signaling	AT3G09780
Vitvi08g01052	7.73514	3.33963	1.41382	2.36213	0.0181702	0.0481781	NAC domain containing protein 2	Regulation overview.Regulation of gene expression.Regulation of transcription.Transcription factor.NAC family transcription factor	AT3G15510
Vitvi08g01055	51.829	5.06717	1.34266	3.77397	0.000160669	0.000824043	MLO6 (mildew resistance locus O 6)	Cellular process.Cell growth and death.Cell death	AT1G61560
Vitvi08g01057	275.02	2.2266	0.509697	4.36848	1.25e-05	8.61e-05	Unknown	Unknown
Vitvi08g01058	10460.5	2.68728	0.556006	4.83318	1.34e-06	1.17e-05	Peroxidase ATP2a	Metabolism.Primary metabolism.Amino acid metabolism.Aromatic amino acid metabolism.Phenylalanine metabolism.Phenylalanine biosynthesis	AT2G37130
Vitvi08g01074	69.1238	-4.52068	0.691991	-6.53285	6.45e-11	1.27e-09	Zinc finger (C2H2 type) family	Regulation overview.Regulation of gene expression.Regulation of transcription.Transcription factor.C2H2 family transcription factor
Vitvi08g01075	180.122	2.44832	0.200918	12.1857	3.7e-34	1.04e-31	Myosin heavy chain	Cellular process.Cellular component organization and biogenesis.Cytoskeleton organization and biogenesis.Myosin-driven movement
Vitvi08g01077	90.8054	3.09278	0.423417	7.30433	2.79e-13	8.06e-12	Unknown protein	Unknown	AT3G53320
Vitvi08g01084	189.994	-1.58374	0.327418	-4.83707	1.32e-06	1.15e-05	No hit	No hit
Vitvi08g01087	139.017	2.27505	0.397054	5.72982	1.01e-08	1.37e-07	Kinesin motor protein	Cellular process.Cellular component organization and biogenesis.Cytoskeleton organization and biogenesis.Microtubule organization and biogenesis.Microtubule-driven movement	AT2G37420
Vitvi08g01097	297.763	-1.80008	0.322171	-5.58733	2.31e-08	2.93e-07	Heavy-metal-associated domain-containing protein	Unclear	AT2G37390
Vitvi08g01102	928.449	-1.04044	0.125735	-8.27486	1.29e-16	5.79e-15	Pectate lyase	Cellular process.Cellular component organization and biogenesis.Cell wall organization and biogenesis.Cell wall metabolism.Cell wall catabolism.Pectin catabolism	AT3G55140
Vitvi08g01113	5599.29	-1.0422	0.184177	-5.65866	1.53e-08	2.01e-07	RSZ33 (Arginine/serine-rich Zinc knuckle-containing protein 33)	Transport overview.Primary Active Transporters.P-P-bond hydrolysis-driven transporters.Nuclear mRNA Exporter	AT2G37340
Vitvi08g01123	146.685	2.54792	0.492776	5.17054	2.33e-07	2.41e-06	Zinc finger (C3HC4-type ring finger)	Regulation overview.Regulation of gene expression.Regulation of transcription.Transcription factor.Zinc finger C3HC4 family transcription factor
Vitvi08g01124	1293.69	1.03286	0.208338	4.95763	7.14e-07	6.63e-06	Protein phosphatase 2C	Signaling.Signaling pathway.Protein phosphatase.PP2C	AT3G12620
Vitvi08g01139	450.146	-2.22351	0.360683	-6.16473	7.06e-10	1.19e-08	Pseudo-response regulator 7 (APRR7)	Signaling.Hormone Signaling.Cytokinin Signaling.Cytokinin-mediated Signaling pathway	AT5G02810
Vitvi08g01140	3085.53	-1.00577	0.135071	-7.44623	9.6e-14	2.98e-12	Unknown protein	Unknown	AT2G37240
Vitvi08g01143	9858.26	-1.54438	0.186134	-8.29718	1.07e-16	4.9e-15	L-ascorbate peroxidase 1, cytosolic (APX1)	Metabolism.Primary metabolism.Organic acid metabolism.Ascorbate and aldarate metabolism	AT3G09640
Vitvi08g01146	55.7662	1.84098	0.402766	4.57085	4.86e-06	3.69e-05	APETALA2 (AP2) floral homeotic protein	Signaling.Hormone Signaling.Ethylene Signaling.Ethylene-mediated Signaling pathway	AT4G36920
Vitvi08g01149	381.63	1.60927	0.284303	5.6604	1.51e-08	2e-07	LCL1 (LHY/CCA1-like 1)	Signaling.Signaling pathway.Circadian clock Signaling	AT3G09600
Vitvi08g01150	483.224	1.74828	0.308775	5.66198	1.5e-08	1.98e-07	Unknown protein	Unknown	AT3G53470
Vitvi08g01158	52.1822	2.064	0.428548	4.81627	1.46e-06	1.26e-05	Mini-chromosome maintenance protein MCM8	Cellular process.Cell growth and death	AT3G09660
Vitvi08g01174	2223.08	1.92226	0.284749	6.75071	1.47e-11	3.23e-10	Cation/hydrogen exchanger 20 (CHX20)	Transport overview.Electrochemical Potential-driven Transporters.Porters.Monovalent Cation:Proton Antiporter-2	AT3G53720
Vitvi08g01183	205.381	2.59689	0.560728	4.63128	3.63e-06	2.85e-05	Zinc finger (C3HC4-type ring finger)	Regulation overview.Regulation of gene expression.Regulation of transcription.Transcription factor.Zinc finger C3HC4 family transcription factor	AT2G37580
Vitvi08g01196	415966	-2.37688	0.348561	-6.81911	9.16e-12	2.09e-10	Metallothionein	Cellular process.Cellular homeostasis.Heavy metal ion homeostasis
Vitvi08g01197	72.7239	2.4594	0.312109	7.87992	3.28e-15	1.24e-13	Kinesin family member 22	Cellular process.Cellular component organization and biogenesis.Cytoskeleton organization and biogenesis.Microtubule organization and biogenesis.Microtubule-driven movement	AT5G02370
Vitvi08g01203	150.983	1.34202	0.42513	3.15673	0.00159547	0.00610438	Myb domain protein 91	Regulation overview.Regulation of gene expression.Regulation of transcription.Transcription factor.MYB family transcription factor	AT2G37630
Vitvi08g01205	21.2111	-3.06147	1.19291	-2.56638	0.0102766	0.0298881	C2 domain containing protein	Signaling.Signaling pathway.Protein kinase
Vitvi08g01206	928.286	5.63444	0.603349	9.33861	9.76e-21	7e-19	Alpha-expansin 6 precursor	Signaling.Hormone Signaling.Auxin Signaling.Auxin-mediated Signaling pathway	AT2G28950
Vitvi08g01223	176.337	3.45375	0.939676	3.67547	0.000237412	0.00116144	Laccase-17 precursor	Metabolism.single reactions	AT2G29130
Vitvi08g01228	76.5089	3.89725	0.795954	4.89633	9.76e-07	8.8e-06	Laccase	Metabolism.single reactions	AT5G60020
Vitvi08g01231	954.824	1.35447	0.330661	4.09624	4.2e-05	0.000253131	Unknown	Unknown
Vitvi08g01237	462.369	4.72152	0.534832	8.82804	1.07e-18	6.15e-17	Thaumatin	Response to stimulus.Stress response	AT5G02140
Vitvi08g01241	36.6386	4.23274	1.63202	2.59356	0.00949883	0.0280145	Lectin receptor kinase 7	Signaling.Signaling pathway.Protein kinase	AT2G37710
Vitvi08g01250	11.1624	4.4405	1.26726	3.50403	0.00045828	0.0020721	Tropinone reductase	Metabolism.Primary metabolism.Amino acid metabolism.Arginine and proline metabolism.Urea cycle	AT2G29290
Vitvi08g01253	11.3352	5.34933	1.89209	2.8272	0.00469566	0.0154376	Tropinone reductase	Metabolism.Primary metabolism.Amino acid metabolism.Arginine and proline metabolism.Urea cycle	AT2G29290
Vitvi08g01264	40.1223	3.09021	0.952129	3.24558	0.00117212	0.00466433	DC1 domain-containing protein	Unknown	AT2G37800
Vitvi08g01276	652.523	3.51664	0.353139	9.95823	2.32e-23	2.18e-21	Glyoxal oxidase	Unclear	AT3G53950
Vitvi08g01285	8181.74	-1.28591	0.293718	-4.37805	1.2e-05	8.28e-05	Universal stress protein (USP) family protein	Response to stimulus.Stress response	AT3G53990
Vitvi08g01290	661.758	3.39237	0.370278	9.16168	5.11e-20	3.38e-18	Copper transporter 3	Transport overview.Channels and pores.a-Type channels.Copper Transporter	AT5G59040
Vitvi08g01293	590.895	3.41443	0.252009	13.5488	8.05e-42	4.39e-39	Unknown protein	Unknown	AT5G01030
[truncated: 2,794 more rows]
